# Supplementary material
Source: publisher figshare collection journal article supplement (https://sage.figshare.com/ndownloader/files/15473102)
Supplement: Supplementary file 1 [file 15473102]

## Sheet: Supplementary_Table_S2
ENSG_ID	baseMean	log2FC	lfcSE	stat	pvalue	padj	external gene ID	Pathway_cutoff_0.1	Pathway_cutoff_0.2	Pathway_cutoff_0.4
ENSG00000220842	35669.6	-0.262709	0.0602288	-4.36185	1.28965e-05	0.0589161	RPL21P16	Yes	Yes	Yes
ENSG00000091009	3797.01	0.138961	0.0328656	4.22815	2.35622e-05	0.0589161	RBM27	Yes	Yes	Yes
ENSG00000152495	10291	0.221288	0.0534512	4.14001	3.47295e-05	0.0589161	CAMK4	Yes	Yes	Yes
ENSG00000182541	3081.33	0.222594	0.0547359	4.06669	4.76847e-05	0.0589161	LIMK2	Yes	Yes	Yes
ENSG00000103351	1440	0.291114	0.0720466	4.04063	5.33081e-05	0.0589161	CLUAP1	Yes	Yes	Yes
ENSG00000111371	23215.5	0.125637	0.0322991	3.88979	0.00010033	0.0843085	SLC38A1	Yes	Yes	Yes
ENSG00000169967	3390.01	0.130539	0.0336909	3.87461	0.000106797	0.0843085	MAP3K2	Yes	Yes	Yes
ENSG00000074706	7397.88	0.212468	0.0562545	3.7769	0.000158795	0.0893675	IPCEF1	Yes	Yes	Yes
ENSG00000128789	2269.36	-0.0851369	0.0227258	-3.74627	0.000179486	0.0893675	PSMG2	Yes	Yes	Yes
ENSG00000140564	3258.47	-0.158218	0.0424607	-3.72621	0.00019438	0.0893675	FURIN	Yes	Yes	Yes
ENSG00000124198	2836.34	0.114267	0.0307002	3.72202	0.000197634	0.0893675	ARFGEF2	Yes	Yes	Yes
ENSG00000111786	4742.54	-0.0900496	0.0242407	-3.7148	0.000203362	0.0893675	SRSF9	Yes	Yes	Yes
ENSG00000158987	8254.28	0.152934	0.0412622	3.70639	0.000210238	0.0893675	RAPGEF6	Yes	Yes	Yes
ENSG00000140264	21036	-0.111112	0.0302777	-3.66975	0.000242784	0.089844	SERF2	Yes	Yes	Yes
ENSG00000091039	9547.63	0.127633	0.0347907	3.66861	0.000243876	0.089844	OSBPL8	Yes	Yes	Yes
ENSG00000152256	2327.69	0.247163	0.0679884	3.63537	0.000277585	0.0958709	PDK1	Yes	Yes	Yes
ENSG00000124172	20463.5	-0.0956447	0.0267502	-3.57547	0.000349599	0.11364	ATP5E	No	Yes	Yes
ENSG00000105808	2641.59	0.289855	0.0816929	3.54811	0.000388008	0.117048	RASA4	No	Yes	Yes
ENSG00000173436	3190.16	-0.130808	0.0369674	-3.53847	0.000402446	0.117048	MINOS1	No	Yes	Yes
ENSG00000204217	1905.21	0.170311	0.0483677	3.52117	0.000429644	0.118711	BMPR2	No	Yes	Yes
ENSG00000214046	1551.94	-0.107566	0.030905	-3.48053	0.000500421	0.131682	SMIM7	No	Yes	Yes
ENSG00000078177	1591.29	0.190785	0.055726	3.42363	0.000617898	0.149608	N4BP2	No	Yes	Yes
ENSG00000142669	24022.8	-0.186665	0.0550126	-3.39314	0.000690965	0.149608	SH3BGRL3	No	Yes	Yes
ENSG00000091542	5496.25	0.144373	0.0425752	3.391	0.000696372	0.149608	ALKBH5	No	Yes	Yes
ENSG00000132549	1840.15	0.127319	0.037551	3.39056	0.000697498	0.149608	VPS13B	No	Yes	Yes
ENSG00000165672	3259.5	-0.118547	0.0349897	-3.38805	0.000703911	0.149608	PRDX3	No	Yes	Yes
ENSG00000163807	1587.77	0.132001	0.0392919	3.3595	0.000780831	0.154103	KIAA1143	No	Yes	Yes
ENSG00000281665	1587.77	0.132001	0.0392919	3.3595	0.000780831	0.154103	KIAA1143	No	Duplicate	Duplicate
ENSG00000188994	3083.49	0.124116	0.0372403	3.33285	0.00085961	0.162527	ZNF292	No	Yes	Yes
ENSG00000172270	10129.7	-0.119819	0.0360619	-3.32259	0.000891857	0.162527	BSG	No	Yes	Yes
ENSG00000172428	2418.55	-0.103033	0.0310673	-3.31643	0.00091175	0.162527	COPS9	No	Yes	Yes
ENSG00000155744	1569.01	0.123503	0.0379876	3.25113	0.00114949	0.183706	FAM126B	No	Yes	Yes
ENSG00000151779	1917.26	0.132808	0.040855	3.25071	0.00115117	0.183706	NBAS	No	Yes	Yes
ENSG00000276371	4400.98	0.09377	0.0288534	3.24987	0.00115457	0.183706	FAM60A	No	Yes	Yes
ENSG00000163428	2270.42	0.119505	0.0368367	3.24419	0.00117786	0.183706	LRRC58	No	Yes	Yes
ENSG00000117602	17927.2	0.123986	0.0383564	3.23247	0.00122726	0.183706	RCAN3	No	Yes	Yes
ENSG00000111674	1608.37	-0.184623	0.0571264	-3.23182	0.00123002	0.183706	ENO2	No	Yes	Yes
ENSG00000062650	5900.37	0.0974546	0.0304069	3.20502	0.00135055	0.193975	WAPL	No	Yes	Yes
ENSG00000138641	6484.72	0.097462	0.0304463	3.20111	0.00136899	0.193975	HERC3	No	Yes	Yes
ENSG00000101596	12428	0.139336	0.0437061	3.18801	0.00143255	0.197907	SMCHD1	No	Yes	Yes
ENSG00000088986	4298.38	-0.123057	0.0387615	-3.17473	0.00149977	0.199437	DYNLL1	No	Yes	Yes
ENSG00000165609	2630.62	-0.0865386	0.0272864	-3.17149	0.00151657	0.199437	NUDT5	No	Yes	Yes
ENSG00000170043	5227.71	-0.117688	0.0373363	-3.1521	0.00162098	0.199437	TRAPPC1	No	Yes	Yes
ENSG00000061987	1839.54	0.117183	0.0372088	3.14934	0.00163639	0.199437	MON2	No	Yes	Yes
ENSG00000143811	5841.17	-0.137444	0.043644	-3.14921	0.00163711	0.199437	PYCR2	No	Yes	Yes
ENSG00000100503	7604.02	0.114492	0.0364032	3.14512	0.00166017	0.199437	NIN	No	Yes	Yes
ENSG00000166333	4119.47	-0.151398	0.0488352	-3.10018	0.001934	0.224524	ILK	No	No	Yes
ENSG00000159176	2823.12	-0.0879038	0.0285709	-3.07669	0.0020931	0.224524	CSRP1	No	No	Yes
ENSG00000134313	4509.1	0.118157	0.0384343	3.07426	0.00211025	0.224524	KIDINS220	No	No	Yes
ENSG00000168646	1763.65	0.196817	0.0640448	3.07311	0.00211842	0.224524	AXIN2	No	No	Yes
ENSG00000144357	2503.87	0.097689	0.0317905	3.0729	0.0021199	0.224524	UBR3	No	No	Yes
ENSG00000163848	3497.08	0.125345	0.0409173	3.06338	0.00218849	0.224524	ZNF148	No	No	Yes
ENSG00000163939	3728.09	0.0927808	0.0303395	3.05809	0.00222754	0.224524	PBRM1	No	No	Yes
ENSG00000100100	32615.2	0.220655	0.0722353	3.05467	0.00225308	0.224524	PIK3IP1	No	No	Yes
ENSG00000108559	2551.61	0.0863095	0.0282796	3.05201	0.00227317	0.224524	NUP88	No	No	Yes
ENSG00000163682	74318.3	-1.03571	0.339386	-3.05172	0.00227531	0.224524	RPL9	No	No	Yes
ENSG00000138439	1976.77	0.209588	0.0691125	3.03257	0.00242483	0.232999	FAM117B	No	No	Yes
ENSG00000181754	2465.88	0.161599	0.0533328	3.03	0.00244551	0.232999	AMIGO1	No	No	Yes
ENSG00000135686	5319.13	0.0753573	0.0250143	3.01257	0.00259045	0.242624	KLHL36	No	No	Yes
ENSG00000101474	5321.66	-0.124466	0.0415068	-2.9987	0.00271136	0.249717	APMAP	No	No	Yes
ENSG00000173221	4840.52	0.149225	0.0499969	2.98468	0.00283876	0.257164	GLRX	No	No	Yes
ENSG00000164151	3529.8	0.0838525	0.0281524	2.97852	0.00289643	0.258156	ICE1	No	No	Yes
ENSG00000134352	11190	0.217607	0.0734032	2.96455	0.00303129	0.265887	IL6ST	No	No	Yes
ENSG00000063046	62551	0.110247	0.0372617	2.95872	0.00308917	0.26673	EIF4B	No	No	Yes
ENSG00000107036	1689.42	0.114977	0.0390386	2.94521	0.00322739	0.270508	RIC1	No	No	Yes
ENSG00000153815	2492.21	-0.199383	0.0677138	-2.9445	0.00323482	0.270508	CMIP	No	No	Yes
ENSG00000196547	1826.59	-0.128381	0.0436638	-2.94022	0.00327978	0.270508	MAN2A2	No	No	Yes
ENSG00000132432	2491.44	-0.121309	0.0413238	-2.93558	0.00332921	0.270547	SEC61G	No	No	Yes
ENSG00000164715	1422.81	0.108804	0.0372101	2.92404	0.00345526	0.276721	LMTK2	No	No	Yes
ENSG00000011454	2274.32	0.0642157	0.0220927	2.90664	0.00365328	0.283798	RABGAP1	No	No	Yes
ENSG00000026297	9214.04	0.260864	0.0899156	2.90121	0.00371727	0.283798	RNASET2	No	No	Yes
ENSG00000072858	2602.52	0.104199	0.036123	2.88456	0.00391958	0.283798	SIDT1	No	No	Yes
ENSG00000087088	2536	-0.121845	0.0422682	-2.88265	0.0039434	0.283798	BAX	No	No	Yes
ENSG00000139496	1787.73	0.0886046	0.0307525	2.88122	0.00396145	0.283798	NUP58	No	No	Yes
ENSG00000158604	3131.78	-0.0740802	0.0257688	-2.87481	0.00404276	0.283798	TMED4	No	No	Yes
ENSG00000020633	12201.9	-0.147458	0.0513005	-2.87439	0.00404808	0.283798	RUNX3	No	No	Yes
ENSG00000072135	6954.67	-0.134851	0.0469172	-2.87423	0.00405008	0.283798	PTPN18	No	No	Yes
ENSG00000135185	2168.63	0.0990204	0.0344529	2.87408	0.00405205	0.283798	TMEM243	No	No	Yes
ENSG00000145675	9841.29	0.11687	0.040669	2.87368	0.00405719	0.283798	PIK3R1	No	No	Yes
ENSG00000113441	6850.32	0.113519	0.0398442	2.84906	0.00438483	0.298409	LNPEP	No	No	Yes
ENSG00000203879	4031.12	-0.119156	0.0418423	-2.84773	0.00440326	0.298409	GDI1	No	No	Yes
ENSG00000173020	16379.5	-0.079914	0.02808	-2.84594	0.00442808	0.298409	GRK2	No	No	Yes
ENSG00000157540	6808.03	0.0979645	0.034657	2.82669	0.00470316	0.311469	DYRK1A	No	No	Yes
ENSG00000184384	4290.32	0.135539	0.0480304	2.82195	0.00477326	0.311469	MAML2	No	No	Yes
ENSG00000213626	32299.4	0.158125	0.0560577	2.82076	0.00479097	0.311469	LBH	No	No	Yes
ENSG00000234857	4582.48	-0.108553	0.0385403	-2.81661	0.00485331	0.311853	HNRNPUL2-BSCL2	No	No	Yes
ENSG00000176340	4219.88	-0.0842156	0.0299948	-2.80767	0.0049901	0.316958	COX8A	No	No	Yes
ENSG00000173113	6876.27	-0.107167	0.0382969	-2.79833	0.00513673	0.321258	TRMT112	No	No	Yes
ENSG00000162783	1397.95	-0.229079	0.0820241	-2.79283	0.00522498	0.321258	IER5	No	No	Yes
ENSG00000141627	2059.43	0.081496	0.0292083	2.79016	0.00526817	0.321258	DYM	No	No	Yes
ENSG00000198879	1913.49	0.145021	0.0520012	2.7888	0.00529036	0.321258	SFMBT2	No	No	Yes
ENSG00000124562	3077.56	-0.0974167	0.0349873	-2.78435	0.00536356	0.322163	SNRPC	No	No	Yes
ENSG00000092439	3630.67	0.111269	0.0400828	2.77599	0.00550347	0.327013	TRPM7	No	No	Yes
ENSG00000111605	4227.98	0.115232	0.0415652	2.77231	0.00556592	0.327205	CPSF6	No	No	Yes
ENSG00000278032	1519.52	-0.985526	0.356056	-2.7679	0.00564193	0.328182	LY6E	No	No	Yes
ENSG00000269955	1467.73	0.117004	0.0424208	2.75816	0.00581269	0.331309	C7orf55-LUC7L2	No	No	Yes
ENSG00000105205	2033.81	1.12812	0.409036	2.758	0.0058156	0.331309	CLC	No	No	Yes
ENSG00000215114	1651.28	0.116875	0.042734	2.73494	0.00623909	0.341404	UBXN2B	No	No	Yes
ENSG00000108064	3647.49	0.0695493	0.0254445	2.73338	0.00626883	0.341404	TFAM	No	No	Yes
ENSG00000172575	10932.9	0.0734444	0.026887	2.73159	0.00630287	0.341404	RASGRP1	No	No	Yes
ENSG00000130159	1625.01	0.113961	0.0417772	2.72784	0.00637509	0.341404	ECSIT	No	No	Yes
ENSG00000080839	1425.56	0.0876803	0.0321765	2.72498	0.00643047	0.341404	RBL1	No	No	Yes
ENSG00000113263	19952.4	0.114825	0.0421491	2.72425	0.00644476	0.341404	ITK	No	No	Yes
ENSG00000100330	3014.57	0.0774597	0.0284529	2.72238	0.00648139	0.341404	MTMR3	No	No	Yes
ENSG00000110367	14989.1	0.10509	0.0386062	2.72209	0.00648706	0.341404	DDX6	No	No	Yes
ENSG00000092929	5724.78	-0.0964336	0.0354677	-2.71892	0.00654961	0.341445	UNC13D	No	No	Yes
ENSG00000184939	1955.27	0.0962218	0.0355839	2.70408	0.00684933	0.343066	ZFP90	No	No	Yes
ENSG00000272325	4113.03	0.0946579	0.0350061	2.70404	0.00685015	0.343066	NUDT3	No	No	Yes
ENSG00000138795	23631.2	0.134473	0.0497515	2.7029	0.00687364	0.343066	LEF1	No	No	Yes
ENSG00000255529	4958.5	0.0820117	0.0304001	2.69775	0.00698105	0.343066	POLR2M	No	No	Yes
ENSG00000118707	2100.41	0.0916738	0.0340029	2.69605	0.00701664	0.343066	TGIF2	No	No	Yes
ENSG00000154814	6815.31	0.134806	0.0500217	2.69495	0.00703992	0.343066	OXNAD1	No	No	Yes
ENSG00000182718	9230.63	-0.170113	0.0632417	-2.68989	0.00714753	0.343066	ANXA2	No	No	Yes
ENSG00000146063	1656.66	-0.108276	0.0402829	-2.6879	0.00719039	0.343066	TRIM41	No	No	Yes
ENSG00000075539	4968.05	0.0966838	0.0359794	2.6872	0.00720544	0.343066	FRYL	No	No	Yes
ENSG00000136153	1520.42	0.163438	0.0608496	2.68594	0.00723255	0.343066	LMO7	No	No	Yes
ENSG00000114861	6488.1	0.10244	0.0381597	2.68451	0.00726361	0.343066	FOXP1	No	No	Yes
ENSG00000228474	10694	-0.101208	0.0379253	-2.66863	0.00761624	0.3494	OST4	No	No	Yes
ENSG00000162378	1696.11	0.119635	0.0448307	2.6686	0.0076167	0.3494	ZYG11B	No	No	Yes
ENSG00000100811	9650.95	0.0688686	0.0258221	2.66704	0.00765226	0.3494	YY1	No	No	Yes
ENSG00000138767	8350.43	0.132384	0.0496716	2.6652	0.00769436	0.3494	CNOT6L	No	No	Yes
ENSG00000172869	1942.92	0.102738	0.0385604	2.66434	0.00771387	0.3494	DMXL1	No	No	Yes
ENSG00000176903	3300.35	-0.114064	0.0428585	-2.6614	0.00778154	0.34952	PNMA1	No	No	Yes
ENSG00000115758	4402.08	-0.218104	0.0820322	-2.65875	0.00784302	0.34952	ODC1	No	No	Yes
ENSG00000147274	11629.2	0.085358	0.0321694	2.65339	0.00796872	0.35071	RBMX	No	No	Yes
ENSG00000229833	1986.27	-0.107993	0.0407182	-2.65221	0.00799665	0.35071	PET100	No	No	Yes
ENSG00000103657	5623.17	0.11085	0.0420282	2.63752	0.00835147	0.363388	HERC1	No	No	Yes
ENSG00000103005	2089.56	-0.118108	0.0450136	-2.62383	0.00869477	0.37064	USB1	No	No	Yes
ENSG00000071859	1811.15	-0.106353	0.0405718	-2.62136	0.00875799	0.37064	FAM50A	No	No	Yes
ENSG00000111639	2898.39	-0.0964935	0.0368295	-2.62001	0.00879284	0.37064	MRPL51	No	No	Yes
ENSG00000157978	17380.1	0.196651	0.0751498	2.61678	0.00887627	0.37064	LDLRAP1	No	No	Yes
ENSG00000126247	10686.2	-0.104302	0.0398825	-2.61524	0.00891639	0.37064	CAPNS1	No	No	Yes
ENSG00000157764	1976.69	0.0844596	0.032316	2.61356	0.00896054	0.37064	BRAF	No	No	Yes
ENSG00000144895	6562.3	0.213791	0.0819392	2.60914	0.00907688	0.37064	EIF2A	No	No	Yes
ENSG00000079739	1650.3	-0.0927161	0.0355604	-2.60728	0.00912638	0.37064	PGM1	No	No	Yes
ENSG00000087460	34242.5	-0.0916617	0.0351714	-2.60614	0.00915692	0.37064	GNAS	No	No	Yes
ENSG00000197070	1854.01	-0.0896881	0.0344362	-2.60447	0.00920169	0.37064	ARRDC1	No	No	Yes
ENSG00000113240	1481.95	0.11246	0.0432385	2.60092	0.00929736	0.37064	CLK4	No	No	Yes
ENSG00000104973	1405.92	-0.118176	0.0454526	-2.59998	0.00932301	0.37064	MED25	No	No	Yes
ENSG00000091409	10820	0.124228	0.0478734	2.59494	0.00946087	0.371885	ITGA6	No	No	Yes
ENSG00000181191	1767.59	0.0945764	0.0364608	2.59392	0.00948892	0.371885	PJA1	No	No	Yes
ENSG00000157570	3002.33	-0.203607	0.0792966	-2.56767	0.0102386	0.398439	TSPAN18	No	No	Yes
ENSG00000160271	3152.14	-0.145483	0.0568074	-2.56098	0.0104378	0.401263	RALGDS	No	No	No
ENSG00000185591	5894.26	0.0857476	0.0334904	2.56036	0.0104564	0.401263	SP1	No	No	No
ENSG00000150907	6552.42	0.108548	0.042457	2.55667	0.010568	0.402751	FOXO1	No	No	No
ENSG00000137845	7289.38	0.137417	0.0538669	2.55105	0.0107397	0.404167	ADAM10	No	No	No
ENSG00000139343	2663.91	-0.0772859	0.0303099	-2.54986	0.0107767	0.404167	SNRPF	No	No	No
ENSG00000158856	1980.67	-0.264958	0.103974	-2.54831	0.0108246	0.404167	DMTN	No	No	No
ENSG00000119950	2415.81	0.142927	0.0562107	2.54271	0.0109998	0.405641	MXI1	No	No	No
ENSG00000170802	3000.6	0.116645	0.0458808	2.54235	0.0110109	0.405641	FOXN2	No	No	No
ENSG00000078142	2560.43	0.0749602	0.0295785	2.53428	0.0112678	0.407753	PIK3C3	No	No	No
ENSG00000185187	6794.84	-0.10738	0.0423461	-2.53576	0.0112203	0.407753	SIGIRR	No	No	No
ENSG00000169018	4251.62	0.0690159	0.0272634	2.53145	0.0113592	0.407753	FEM1B	No	No	No
ENSG00000099785	1807.52	-0.204607	0.0808301	-2.53132	0.0113634	0.407753	MARCH2	No	No	No
ENSG00000137770	3276.76	0.0885335	0.0350676	2.52465	0.0115812	0.41289	CTDSPL2	No	No	No
ENSG00000102572	8602.97	-0.0629205	0.0249693	-2.51991	0.0117384	0.413365	STK24	No	No	No
ENSG00000101972	10463.1	0.0834405	0.0331147	2.51974	0.0117442	0.413365	STAG2	No	No	No
ENSG00000070366	2452.98	-0.0848386	0.0337482	-2.51387	0.0119413	0.417645	SMG6	No	No	No
ENSG00000104814	5009.87	-0.0890586	0.0355805	-2.50302	0.0123139	0.427966	MAP4K1	No	No	No
ENSG00000167005	7500.3	0.0616202	0.0246572	2.49908	0.0124516	0.430049	NUDT21	No	No	No
ENSG00000198805	3072.25	-0.131305	0.0526552	-2.49367	0.012643	0.433945	PNP	No	No	No
ENSG00000108510	4376.49	0.0924898	0.0371412	2.49022	0.0127664	0.434257	MED13	No	No	No
ENSG00000213413	2517.35	-0.151819	0.0611412	-2.48308	0.0130251	0.434257	PVRIG	No	No	No
ENSG00000178163	1885.34	0.128187	0.0517212	2.47842	0.0131964	0.434257	ZNF518B	No	No	No
ENSG00000116406	2430.52	0.081533	0.0330158	2.46952	0.0135295	0.434257	EDEM3	No	No	No
ENSG00000107331	1547.38	-0.17496	0.0709	-2.4677	0.0135984	0.434257	ABCA2	No	No	No
ENSG00000196712	2162.2	0.117574	0.047646	2.46766	0.0136	0.434257	NF1	No	No	No
ENSG00000167863	5991.71	-0.0725659	0.0294214	-2.46643	0.0136468	0.434257	ATP5H	No	No	No
ENSG00000173744	3535.93	0.0766962	0.0311019	2.46597	0.0136644	0.434257	AGFG1	No	No	No
ENSG00000130511	2297.69	-0.16333	0.0662939	-2.46373	0.0137499	0.434257	SSBP4	No	No	No
ENSG00000167397	1761.13	-0.0891568	0.0361949	-2.46324	0.0137687	0.434257	VKORC1	No	No	No
ENSG00000148700	28644.9	0.0971582	0.0394788	2.46103	0.0138541	0.434257	ADD3	No	No	No
ENSG00000088448	2766.84	0.0979323	0.0398123	2.45985	0.0138995	0.434257	ANKRD10	No	No	No
ENSG00000198689	1978.5	0.0655524	0.0266538	2.4594	0.0139168	0.434257	SLC9A6	No	No	No
ENSG00000115421	1959.43	0.0706986	0.028808	2.45413	0.0141227	0.434257	PAPOLG	No	No	No
ENSG00000182934	8603.56	-0.072161	0.029409	-2.45371	0.0141392	0.434257	SRPRA	No	No	No
ENSG00000141232	3497	-0.1843	0.0751744	-2.45164	0.0142208	0.434257	TOB1	No	No	No
ENSG00000115825	3119.73	0.115247	0.0470412	2.44991	0.0142892	0.434257	PRKD3	No	No	No
ENSG00000151692	3047.95	0.137528	0.0562188	2.44631	0.0144328	0.434257	RNF144A	No	No	No
ENSG00000115839	3676.3	0.0737856	0.0302376	2.44019	0.0146794	0.434257	RAB3GAP1	No	No	No
ENSG00000155903	4393.43	0.0864561	0.0354439	2.43924	0.0147182	0.434257	RASA2	No	No	No
ENSG00000107581	15468.7	0.0646242	0.0265123	2.43752	0.0147886	0.434257	EIF3A	No	No	No
ENSG00000164830	2383.06	0.118774	0.0487277	2.43751	0.0147889	0.434257	OXR1	No	No	No
ENSG00000157191	11209.2	0.0668792	0.027452	2.43623	0.0148414	0.434257	NECAP2	No	No	No
ENSG00000104517	5045.3	0.0791317	0.0324843	2.436	0.0148508	0.434257	UBR5	No	No	No
ENSG00000172845	6892.77	0.0645696	0.0265204	2.43472	0.0149034	0.434257	SP3	No	No	No
ENSG00000087206	1860.7	0.0938578	0.038561	2.43401	0.0149325	0.434257	UIMC1	No	No	No
ENSG00000170222	1844.7	0.1312	0.0539124	2.43357	0.0149506	0.434257	ADPRM	No	No	No
ENSG00000114127	4112.8	0.106155	0.0436422	2.43238	0.0149998	0.434257	XRN1	No	No	No
ENSG00000152102	7256.9	0.0588419	0.0241922	2.43227	0.0150045	0.434257	FAM168B	No	No	No
ENSG00000184076	2954.27	-0.0531282	0.0218441	-2.43215	0.0150096	0.434257	UQCR10	No	No	No
ENSG00000108100	6770.16	0.0865387	0.0357292	2.42207	0.0154324	0.439527	CCNY	No	No	No
ENSG00000133657	3777.27	0.0716614	0.0296107	2.42012	0.0155155	0.439527	ATP13A3	No	No	No
ENSG00000110651	6794.46	-0.135121	0.0558534	-2.41922	0.0155539	0.439527	CD81	No	No	No
ENSG00000084070	21243.5	0.186649	0.0772095	2.41744	0.0156303	0.439527	SMAP2	No	No	No
ENSG00000066739	1623.88	0.0934623	0.0386656	2.41719	0.0156407	0.439527	ATG2B	No	No	No
ENSG00000253729	5525.87	0.119464	0.0494361	2.41654	0.015669	0.439527	PRKDC	No	No	No
ENSG00000085415	1508.6	0.0935114	0.0387674	2.41212	0.0158603	0.442646	SEH1L	No	No	No
ENSG00000185825	8595.37	-0.0726992	0.0301632	-2.41019	0.0159441	0.44275	BCAP31	No	No	No
ENSG00000163811	2813.58	0.0780968	0.0324498	2.4067	0.0160974	0.443248	WDR43	No	No	No
ENSG00000125356	5501.27	-0.0851853	0.0354274	-2.40451	0.0161943	0.443248	NDUFA1	No	No	No
ENSG00000152133	1735.09	0.113325	0.0471339	2.40432	0.0162027	0.443248	GPATCH11	No	No	No
ENSG00000141076	1927.45	0.091928	0.0382958	2.40047	0.0163738	0.445123	UTP4	No	No	No
ENSG00000130717	1513.5	0.0745491	0.0310807	2.39856	0.0164595	0.445123	UCK1	No	No	No
ENSG00000131507	17533.7	0.130333	0.0543975	2.39594	0.0165779	0.445123	NDFIP1	No	No	No
ENSG00000198815	4301.27	0.0601094	0.0250916	2.39559	0.0165934	0.445123	FOXJ3	No	No	No
ENSG00000027869	1668.49	-0.189632	0.0792672	-2.39231	0.0167427	0.446957	SH2D2A	No	No	No
ENSG00000125772	3100.74	-0.140788	0.0588942	-2.39053	0.0168243	0.446976	GPCPD1	No	No	No
ENSG00000180776	7037.79	0.103682	0.0435285	2.38193	0.017222	0.454435	ZDHHC20	No	No	No
ENSG00000048740	11973.9	0.115243	0.0484314	2.37952	0.0173353	0.454435	CELF2	No	No	No
ENSG00000147251	7729.69	0.0865955	0.0363974	2.37917	0.0173517	0.454435	DOCK11	No	No	No
ENSG00000100731	7528.33	0.126883	0.0534502	2.37385	0.0176037	0.458858	PCNX1	No	No	No
ENSG00000155368	3753.01	-0.0728835	0.0307745	-2.36831	0.0178697	0.461581	DBI	No	No	No
ENSG00000186432	4187.79	0.0795127	0.0336162	2.36531	0.018015	0.461581	KPNA4	No	No	No
ENSG00000102265	2810.48	-0.189057	0.0799786	-2.36384	0.0180867	0.461581	TIMP1	No	No	No
ENSG00000157500	3177.17	0.0818515	0.0346375	2.36309	0.0181234	0.461581	APPL1	No	No	No
ENSG00000198380	1463.92	0.139205	0.0589092	2.36304	0.0181258	0.461581	GFPT1	No	No	No
ENSG00000149311	11766.1	0.132784	0.0562509	2.36057	0.0182467	0.462529	ATM	No	No	No
ENSG00000198160	4810.74	0.12979	0.0550434	2.35795	0.0183761	0.463405	MIER1	No	No	No
ENSG00000166326	6055.78	0.0713715	0.030288	2.35643	0.0184515	0.463405	TRIM44	No	No	No
ENSG00000134644	5237.3	0.0734961	0.0312112	2.3548	0.0185328	0.463405	PUM1	No	No	No
ENSG00000198265	4386.51	0.100596	0.0428162	2.34949	0.018799	0.464172	HELZ	No	No	No
ENSG00000198898	5683.31	0.0771085	0.0328223	2.34927	0.0188103	0.464172	CAPZA2	No	No	No
ENSG00000134758	6129.46	0.100099	0.042612	2.34908	0.0188196	0.464172	RNF138	No	No	No
ENSG00000172757	54759	-0.0899391	0.0383126	-2.34751	0.0188995	0.464172	CFL1	No	No	No
ENSG00000141873	1426.08	-0.101966	0.0434714	-2.34559	0.0189971	0.464378	SLC39A3	No	No	No
ENSG00000135127	1699.08	-0.123467	0.0527234	-2.34179	0.0191915	0.464378	BICDL1	No	No	No
ENSG00000213145	10667.4	-0.183799	0.0785327	-2.34042	0.0192621	0.464378	CRIP1	No	No	No
ENSG00000111481	6620.38	-0.0411724	0.0175941	-2.34012	0.0192773	0.464378	COPZ1	No	No	No
ENSG00000102189	1657.3	0.193103	0.0825548	2.33909	0.0193309	0.464378	EEA1	No	No	No
ENSG00000198034	203376	-0.0836873	0.0358017	-2.33752	0.0194121	0.464378	RPS4X	No	No	No
ENSG00000124733	2596.87	-0.0565632	0.024275	-2.3301	0.0198009	0.468719	MEA1	No	No	No
ENSG00000164674	1376.15	-0.133594	0.0573796	-2.32824	0.0198993	0.468719	SYTL3	No	No	No
ENSG00000112576	26902.7	0.115338	0.0495649	2.327	0.0199652	0.468719	CCND3	No	No	No
ENSG00000123908	2950.62	0.110526	0.0475164	2.32606	0.0200152	0.468719	AGO2	No	No	No
ENSG00000219200	5091.02	-0.108045	0.0464509	-2.32602	0.0200177	0.468719	RNASEK	No	No	No
ENSG00000160551	3542.76	0.109323	0.0470962	2.32127	0.0202724	0.47268	TAOK1	No	No	No
ENSG00000130592	26462.1	-0.104636	0.0451861	-2.31568	0.0205759	0.474286	LSP1	No	No	No
ENSG00000243279	1390.74	-0.10565	0.0456354	-2.31509	0.0206083	0.474286	PRAF2	No	No	No
ENSG00000196924	61828.3	-0.0891883	0.0385587	-2.31305	0.0207199	0.474286	FLNA	No	No	No
ENSG00000166337	3855.64	-0.0560847	0.0242554	-2.31226	0.0207633	0.474286	TAF10	No	No	No
ENSG00000100395	2254.26	-0.0678535	0.0293564	-2.31137	0.0208123	0.474286	L3MBTL2	No	No	No
ENSG00000198258	6133.86	-0.0927434	0.0401386	-2.31058	0.0208562	0.474286	UBL5	No	No	No
ENSG00000126264	6637.38	-0.117565	0.0510347	-2.30362	0.0212439	0.478396	HCST	No	No	No
ENSG00000125534	7402.9	-0.223118	0.0970503	-2.29899	0.0215056	0.478396	PPDPF	No	No	No
ENSG00000134375	1380.88	-0.0971303	0.0422601	-2.29839	0.0215395	0.478396	TIMM17A	No	No	No
ENSG00000155115	1789.16	-0.0882028	0.0384562	-2.29359	0.021814	0.478396	GTF3C6	No	No	No
ENSG00000133703	4046.5	0.0738347	0.0322138	2.29203	0.0219042	0.478396	KRAS	No	No	No
ENSG00000050426	3015.23	0.106551	0.0464908	2.29187	0.0219129	0.478396	LETMD1	No	No	No
ENSG00000196535	4660.41	-0.0869284	0.0379325	-2.29166	0.0219252	0.478396	MYO18A	No	No	No
ENSG00000239779	2081.88	-0.0889176	0.0388167	-2.29071	0.0219804	0.478396	WBP1	No	No	No
ENSG00000099817	4635.34	-0.105507	0.0460698	-2.29015	0.0220125	0.478396	POLR2E	No	No	No
ENSG00000174738	5109.83	0.0993958	0.0434063	2.2899	0.0220273	0.478396	NR1D2	No	No	No
ENSG00000118922	5210.23	0.097498	0.0425797	2.28978	0.0220342	0.478396	KLF12	No	No	No
ENSG00000068305	2310.24	0.0881786	0.038544	2.28774	0.0221528	0.478396	MEF2A	No	No	No
ENSG00000148337	3925.35	-0.0904175	0.0396156	-2.28237	0.0224676	0.478396	CIZ1	No	No	No
ENSG00000211734	2725.5	-0.193234	0.0846926	-2.28159	0.0225134	0.478396	TRBV5-1	No	No	No
ENSG00000164754	16123	0.0792211	0.0347393	2.28045	0.0225813	0.478396	RAD21	No	No	No
ENSG00000141293	7688.11	-0.0716235	0.0314135	-2.28003	0.0226062	0.478396	SKAP1	No	No	No
ENSG00000135439	4636.86	-0.0859451	0.0377244	-2.27824	0.0227125	0.478396	AGAP2	No	No	No
ENSG00000198146	3293.86	0.101649	0.0446247	2.27786	0.0227351	0.478396	ZNF770	No	No	No
ENSG00000197969	1751.29	0.103078	0.0452532	2.2778	0.0227387	0.478396	VPS13A	No	No	No
ENSG00000053254	8851.51	0.102965	0.0452135	2.2773	0.0227684	0.478396	FOXN3	No	No	No
ENSG00000169251	2800.39	0.0724857	0.0318571	2.27534	0.0228856	0.479037	NMD3	No	No	No
ENSG00000119760	1512.36	-0.0640592	0.0282602	-2.26676	0.0234046	0.481359	SUPT7L	No	No	No
ENSG00000141646	4147.13	0.071388	0.0315253	2.26447	0.0235454	0.481359	SMAD4	No	No	No
ENSG00000237550	26103.9	0.676308	0.298805	2.26337	0.0236126	0.481359	RPL9P9	No	No	No
ENSG00000120137	2622.93	0.0938382	0.0414724	2.26267	0.0236561	0.481359	PANK3	No	No	No
ENSG00000275079	1714.55	-0.210649	0.0931163	-2.26221	0.0236844	0.481359	LPCAT1	No	No	No
ENSG00000181163	59887.1	0.0850087	0.0375819	2.26196	0.0236999	0.481359	NPM1	No	No	No
ENSG00000077097	13128.1	0.0706686	0.0312549	2.26104	0.0237567	0.481359	TOP2B	No	No	No
ENSG00000110697	3706.32	-0.115487	0.0511134	-2.25943	0.0238567	0.481359	PITPNM1	No	No	No
ENSG00000141556	2691.67	-0.122381	0.0541703	-2.25919	0.0238714	0.481359	TBCD	No	No	No
ENSG00000170315	40805.8	-0.0991909	0.04391	-2.25896	0.023886	0.481359	UBB	No	No	No
ENSG00000047932	2868.13	0.060487	0.0267896	2.25786	0.0239547	0.481359	GOPC	No	No	No
ENSG00000166226	6684.17	0.0763865	0.0339666	2.24887	0.0245208	0.490949	CCT2	No	No	No
ENSG00000136068	3734.88	0.189489	0.0843394	2.24674	0.0246564	0.491882	FLNB	No	No	No
ENSG00000205352	11193.4	-0.0831183	0.0370605	-2.24277	0.0249115	0.495046	PRR13	No	No	No
ENSG00000070081	5021.35	0.156337	0.0697599	2.24107	0.0250216	0.495046	NUCB2	No	No	No
ENSG00000066084	3139.82	0.118617	0.0530402	2.23636	0.025328	0.495046	DIP2B	No	No	No
ENSG00000149932	3502.72	-0.0746537	0.0334054	-2.23478	0.0254319	0.495046	TMEM219	No	No	No
ENSG00000203485	2479.61	-0.218279	0.0978381	-2.23102	0.0256796	0.495046	INF2	No	No	No
ENSG00000163608	3062.34	0.0732094	0.0328256	2.23025	0.0257308	0.495046	NEPRO	No	No	No
ENSG00000139233	1882.75	-0.0858686	0.0385356	-2.22829	0.025861	0.495046	LLPH	No	No	No
ENSG00000156504	1927.72	-0.0846516	0.0379983	-2.22777	0.0258958	0.495046	FAM122B	No	No	No
ENSG00000069275	10337.8	0.0895791	0.0402197	2.22724	0.025931	0.495046	NUCKS1	No	No	No
ENSG00000103429	2675.61	0.0957692	0.0430032	2.22703	0.0259455	0.495046	BFAR	No	No	No
ENSG00000103064	3874.11	0.0865006	0.0388727	2.22523	0.026066	0.495046	SLC7A6	No	No	No
ENSG00000082258	1733.43	0.0770774	0.0346511	2.22438	0.0261227	0.495046	CCNT2	No	No	No
ENSG00000175155	1398.23	0.164888	0.0741541	2.22359	0.0261761	0.495046	YPEL2	No	No	No
ENSG00000130177	1411.88	-0.0806473	0.0362728	-2.22336	0.0261917	0.495046	CDC16	No	No	No
ENSG00000150054	2534.87	0.0968249	0.0435525	2.22317	0.0262041	0.495046	MPP7	No	No	No
ENSG00000148362	1445.92	-0.116531	0.0524319	-2.22252	0.0262484	0.495046	C9orf142	No	No	No
ENSG00000163463	3014.17	-0.0840514	0.0379113	-2.21706	0.0266193	0.500333	KRTCAP2	No	No	No
ENSG00000105939	13574.5	0.0939038	0.0423979	2.21482	0.0267723	0.500924	ZC3HAV1	No	No	No
ENSG00000204178	1815.27	0.0787196	0.0355707	2.21305	0.0268944	0.500924	TMEM57	No	No	No
ENSG00000107262	2380.29	0.0688641	0.0311231	2.21264	0.0269226	0.500924	BAG1	No	No	No
ENSG00000118564	6572.31	0.0760226	0.0344027	2.20979	0.02712	0.502903	FBXL5	No	No	No
ENSG00000163788	7983.59	0.0805562	0.0365078	2.20655	0.0273456	0.505391	SNRK	No	No	No
ENSG00000196323	5242.56	0.0990096	0.0449401	2.20314	0.0275847	0.50811	ZBTB44	No	No	No
ENSG00000186660	3772.85	0.0618354	0.0281203	2.19895	0.0278811	0.511864	ZFP91	No	No	No
ENSG00000125676	3560.61	0.0673435	0.030662	2.19632	0.0280692	0.513611	THOC2	No	No	No
ENSG00000027075	15339.4	0.0719242	0.0327802	2.19413	0.0282257	0.514435	PRKCH	No	No	No
ENSG00000130340	2610.26	0.121983	0.0556699	2.19119	0.0284384	0.514435	SNX9	No	No	No
ENSG00000104695	1825.06	-0.0627723	0.0286532	-2.19076	0.0284692	0.514435	PPP2CB	No	No	No
ENSG00000179639	1794.74	0.544731	0.248676	2.19052	0.0284866	0.514435	FCER1A	No	No	No
ENSG00000074603	2573.82	0.0733698	0.0335464	2.18712	0.0287341	0.514565	DPP8	No	No	No
ENSG00000150776	2036.73	0.0683215	0.0312737	2.18463	0.028916	0.514565	C11orf57	No	No	No
ENSG00000220205	8745.36	-0.107648	0.0492775	-2.18453	0.0289232	0.514565	VAMP2	No	No	No
ENSG00000164944	3290.23	0.0746075	0.0341834	2.18256	0.029068	0.514565	KIAA1429	No	No	No
ENSG00000116852	5553.57	-0.0869528	0.0398445	-2.1823	0.0290871	0.514565	KIF21B	No	No	No
ENSG00000274233	7726.89	-0.421723	0.193249	-2.18228	0.0290891	0.514565	CCL5	No	No	No
ENSG00000188559	1677.75	0.0694246	0.0318241	2.18151	0.0291456	0.514565	RALGAPA2	No	No	No
ENSG00000110717	1600.83	-0.0928026	0.0426954	-2.1736	0.0297355	0.523308	NDUFS8	No	No	No
ENSG00000105583	2710.1	-0.0596719	0.0274977	-2.17007	0.0300018	0.524072	WDR83OS	No	No	No
ENSG00000113580	5685.54	0.0938876	0.0432723	2.1697	0.0300299	0.524072	NR3C1	No	No	No
ENSG00000160712	16802	0.089745	0.0413924	2.16815	0.0301469	0.524072	IL6R	No	No	No
ENSG00000154723	3104.67	-0.0515979	0.0237997	-2.168	0.0301583	0.524072	ATP5J	No	No	No
ENSG00000142875	13399.4	0.0804803	0.0371688	2.16526	0.0303676	0.525683	PRKACB	No	No	No
ENSG00000082074	29884.7	0.0713127	0.0329495	2.1643	0.0304413	0.525683	FYB	No	No	No
ENSG00000074966	2528.89	0.154076	0.071296	2.16107	0.0306896	0.526354	TXK	No	No	No
ENSG00000136451	3945.8	0.0570911	0.0264236	2.16061	0.0307256	0.526354	VEZF1	No	No	No
ENSG00000030419	1415.64	0.24037	0.111278	2.16009	0.0307659	0.526354	IKZF2	No	No	No
ENSG00000107738	13866.3	0.0907143	0.0420555	2.15702	0.0310043	0.527261	VSIR	No	No	No
ENSG00000186834	3507.13	-0.096106	0.0445742	-2.15609	0.0310766	0.527261	HEXIM1	No	No	No
ENSG00000178691	4381.6	0.084295	0.0391029	2.15572	0.0311052	0.527261	SUZ12	No	No	No
ENSG00000133103	1397.55	0.119541	0.0554933	2.15415	0.0312282	0.527728	COG6	No	No	No
ENSG00000152558	56786.8	0.101173	0.0470326	2.15112	0.0314671	0.528673	TMEM123	No	No	No
ENSG00000124486	6361.83	0.0859778	0.0399709	2.15101	0.0314755	0.528673	USP9X	No	No	No
ENSG00000084676	3936.89	0.0710978	0.0330919	2.1485	0.0316744	0.530403	NCOA1	No	No	No
ENSG00000163584	1441.44	-0.0962465	0.044838	-2.14654	0.0318299	0.531206	RPL22L1	No	No	No
ENSG00000149781	9927.8	-0.120787	0.0563658	-2.14292	0.0321198	0.531206	FERMT3	No	No	No
ENSG00000183258	2628.49	-0.0523597	0.024438	-2.14255	0.0321489	0.531206	DDX41	No	No	No
ENSG00000213445	8184.83	-0.0939421	0.0438827	-2.14075	0.0322938	0.531206	SIPA1	No	No	No
ENSG00000064601	4950.92	-0.187595	0.0876937	-2.13921	0.0324187	0.531206	CTSA	No	No	No
ENSG00000171115	5538.23	0.08977	0.0420209	2.13632	0.0326533	0.531206	GIMAP8	No	No	No
ENSG00000151702	11078.2	0.0546012	0.0255636	2.1359	0.0326875	0.531206	FLI1	No	No	No
ENSG00000182208	2172.04	-0.0643482	0.0301416	-2.13486	0.0327724	0.531206	MOB2	No	No	No
ENSG00000099219	1577.26	-0.120727	0.0565852	-2.13355	0.0328799	0.531206	ERMP1	No	No	No
ENSG00000243749	2243.36	-0.0786862	0.0368956	-2.13267	0.0329518	0.531206	TMEM35B	No	No	No
ENSG00000160211	2400.91	-0.108086	0.0506904	-2.13227	0.0329845	0.531206	G6PD	No	No	No
ENSG00000168291	3303.54	-0.074272	0.0348424	-2.13166	0.033035	0.531206	PDHB	No	No	No
ENSG00000128585	2476.12	0.0858495	0.04031	2.12973	0.0331938	0.531206	MKLN1	No	No	No
ENSG00000132471	6215.46	-0.0967179	0.0454363	-2.12865	0.0332836	0.531206	WBP2	No	No	No
ENSG00000164506	2242.03	0.0926399	0.0435319	2.12809	0.0333293	0.531206	STXBP5	No	No	No
ENSG00000092871	3512.28	0.0983829	0.0462562	2.12691	0.0334272	0.531206	RFFL	No	No	No
ENSG00000271503	2209	-0.385543	0.181285	-2.12673	0.0334429	0.531206	CCL5	No	No	No
ENSG00000091164	2839.81	0.0583155	0.0274435	2.12493	0.0335921	0.531206	TXNL1	No	No	No
ENSG00000133872	70569.6	0.0833546	0.039274	2.12239	0.0338053	0.531206	SARAF	No	No	No
ENSG00000111142	4465.95	0.0464865	0.0219355	2.11924	0.0340702	0.531206	METAP2	No	No	No
ENSG00000163935	1371.73	0.118307	0.0558336	2.11891	0.0340979	0.531206	SFMBT1	No	No	No
ENSG00000150637	4708.89	-0.168492	0.0795292	-2.11861	0.0341231	0.531206	CD226	No	No	No
ENSG00000114331	5983.56	0.0842847	0.0398039	2.1175	0.0342177	0.531206	ACAP2	No	No	No
ENSG00000105373	78374	0.0883787	0.0417483	2.11694	0.034265	0.531206	NOP53	No	No	No
ENSG00000084090	6584.9	0.0530629	0.0251008	2.11399	0.0345162	0.531206	STARD7	No	No	No
ENSG00000155959	3187.65	0.0654288	0.0309616	2.11322	0.0345816	0.531206	VBP1	No	No	No
ENSG00000169020	3201.74	-0.0808718	0.0383111	-2.11092	0.034779	0.531206	ATP5I	No	No	No
ENSG00000169442	45872.8	-0.0822613	0.0389827	-2.1102	0.0348409	0.531206	CD52	No	No	No
ENSG00000165264	1507.35	-0.0591978	0.0280623	-2.10952	0.0349001	0.531206	NDUFB6	No	No	No
ENSG00000162688	1530.05	0.0917776	0.0435166	2.10902	0.0349426	0.531206	AGL	No	No	No
ENSG00000101109	14803.8	0.0877677	0.0416592	2.1068	0.0351345	0.531206	STK4	No	No	No
ENSG00000105677	1699.83	-0.0607737	0.0288477	-2.10671	0.0351428	0.531206	TMEM147	No	No	No
ENSG00000065150	6296.89	0.0618489	0.0293597	2.10659	0.0351531	0.531206	IPO5	No	No	No
ENSG00000154582	1852.56	-0.053001	0.0251872	-2.10428	0.035354	0.531206	ELOC	No	No	No
ENSG00000164244	3267.78	0.0498464	0.0236893	2.10418	0.0353631	0.531206	PRRC1	No	No	No
ENSG00000159346	3663.73	-0.0908333	0.0432051	-2.10238	0.0355203	0.531206	ADIPOR1	No	No	No
ENSG00000165516	2193.1	0.0660834	0.031444	2.10162	0.0355864	0.531206	KLHDC2	No	No	No
ENSG00000180530	2399.24	0.113429	0.0540063	2.1003	0.0357023	0.531206	NRIP1	No	No	No
ENSG00000156642	2551.54	-0.0633698	0.0301856	-2.09934	0.0357872	0.531206	NPTN	No	No	No
ENSG00000134954	141495	0.115957	0.0552638	2.09825	0.0358828	0.531206	ETS1	No	No	No
ENSG00000215305	1511.43	-0.0775506	0.0369693	-2.09771	0.0359312	0.531206	VPS16	No	No	No
ENSG00000159023	20310.7	0.0946674	0.0451372	2.09732	0.0359649	0.531206	EPB41	No	No	No
ENSG00000157216	5128.65	-0.112925	0.0538704	-2.09623	0.0360618	0.531206	SSBP3	No	No	No
ENSG00000177728	1941.06	-0.0831304	0.0396607	-2.09604	0.0360785	0.531206	TMEM94	No	No	No
ENSG00000160796	2555.07	-0.145434	0.0693929	-2.0958	0.0360997	0.531206	NBEAL2	No	No	No
ENSG00000196911	1442.32	0.0892307	0.0425861	2.0953	0.0361443	0.531206	KPNA5	No	No	No
ENSG00000145337	2796.74	-0.114688	0.0547718	-2.09392	0.0362675	0.531602	PYURF	No	No	No
ENSG00000074370	16058.9	-0.0885257	0.0423196	-2.09184	0.036453	0.532486	ATP2A3	No	No	No
ENSG00000078403	2574.7	0.0705845	0.033755	2.09108	0.0365205	0.532486	MLLT10	No	No	No
ENSG00000165813	2088.81	0.079881	0.0382637	2.08764	0.0368301	0.53501	CCDC186	No	No	No
ENSG00000114062	4044.63	0.0555883	0.0266354	2.08701	0.0368872	0.53501	UBE3A	No	No	No
ENSG00000100387	3364.37	-0.0656673	0.0315594	-2.08075	0.0374565	0.541537	RBX1	No	No	No
ENSG00000168300	3813.98	0.0731424	0.0351811	2.07903	0.037615	0.541537	PCMTD1	No	No	No
ENSG00000125037	2224.39	-0.0556012	0.0267462	-2.07885	0.0376313	0.541537	EMC3	No	No	No
ENSG00000186687	1740.16	0.0876359	0.0421895	2.0772	0.0377833	0.541583	LYRM7	No	No	No
ENSG00000142207	1422.08	0.0856863	0.0413162	2.07391	0.0380873	0.541583	URB1	No	No	No
ENSG00000142453	1412.92	-0.10732	0.0518257	-2.07078	0.0383793	0.541583	CARM1	No	No	No
ENSG00000163785	1531.41	0.0703779	0.0339884	2.07064	0.0383922	0.541583	RYK	No	No	No
ENSG00000114812	2404.46	0.173747	0.0839553	2.06952	0.0384975	0.541583	VIPR1	No	No	No
ENSG00000228628	1402.82	-1.22876	0.594215	-2.06787	0.0386521	0.541583	ATF6B	No	No	No
ENSG00000125447	2320.62	-0.0650133	0.0314423	-2.0677	0.0386681	0.541583	GGA3	No	No	No
ENSG00000112851	8353.99	0.0836687	0.0404777	2.06703	0.038731	0.541583	ERBIN	No	No	No
ENSG00000014216	6992.06	-0.0902908	0.0437652	-2.06308	0.0391055	0.541583	CAPN1	No	No	No
ENSG00000197747	8994.75	-0.126088	0.0611632	-2.0615	0.0392553	0.541583	S100A10	No	No	No
ENSG00000106211	3782.26	-0.125507	0.0609165	-2.06031	0.0393688	0.541583	HSPB1	No	No	No
ENSG00000129625	4607.08	-0.0943927	0.0458222	-2.05998	0.0394005	0.541583	REEP5	No	No	No
ENSG00000265972	214384	0.1588	0.0771165	2.05922	0.0394735	0.541583	TXNIP	No	No	No
ENSG00000066136	1960.53	-0.0638082	0.0309912	-2.05892	0.0395023	0.541583	NFYC	No	No	No
ENSG00000061938	3212.41	-0.091132	0.0443096	-2.05671	0.0397141	0.541583	TNK2	No	No	No
ENSG00000121892	9713.74	0.071156	0.0346112	2.05586	0.0397957	0.541583	PDS5A	No	No	No
ENSG00000102316	4152.76	-0.0602545	0.0293119	-2.05563	0.0398183	0.541583	MAGED2	No	No	No
ENSG00000117868	14611.4	0.0965239	0.0469687	2.05507	0.0398725	0.541583	ESYT2	No	No	No
ENSG00000141446	1717.62	0.093795	0.0456409	2.05507	0.0398727	0.541583	ESCO1	No	No	No
ENSG00000130741	18467.3	0.0857566	0.0417798	2.05258	0.040113	0.541583	EIF2S3	No	No	No
ENSG00000113851	5226.5	0.0629744	0.0307029	2.05109	0.0402584	0.541583	CRBN	No	No	No
ENSG00000030066	2977.47	0.0878342	0.0428336	2.05059	0.0403071	0.541583	NUP160	No	No	No
ENSG00000153339	2686.28	0.0703318	0.0343489	2.04757	0.0406021	0.541583	TRAPPC8	No	No	No
ENSG00000167797	2750.85	-0.122603	0.0599103	-2.04645	0.0407124	0.541583	CDK2AP2	No	No	No
ENSG00000132694	1669.09	-0.0965131	0.0471622	-2.04641	0.0407164	0.541583	ARHGEF11	No	No	No
ENSG00000122218	6600.23	0.0579913	0.0283655	2.04443	0.0409108	0.541583	COPA	No	No	No
ENSG00000241685	1642.02	-0.0582095	0.0284873	-2.04335	0.0410181	0.541583	ARPC1A	No	No	No
ENSG00000132522	2548.69	-0.102627	0.0502351	-2.04294	0.0410585	0.541583	GPS2	No	No	No
ENSG00000143252	4726.63	-0.0588413	0.0288124	-2.04222	0.0411296	0.541583	SDHC	No	No	No
ENSG00000213593	2366.29	-0.0714392	0.0349828	-2.04212	0.0411393	0.541583	TMX2	No	No	No
ENSG00000131748	2711.39	-0.0745734	0.03653	-2.04143	0.0412084	0.541583	STARD3	No	No	No
ENSG00000140511	2461.8	0.146879	0.0719548	2.04127	0.0412236	0.541583	HAPLN3	No	No	No
ENSG00000093072	6671.58	0.0870433	0.0426492	2.04091	0.0412595	0.541583	ADA2	No	No	No
ENSG00000172432	1553.56	-0.116399	0.057087	-2.03898	0.0414523	0.541583	GTPBP2	No	No	No
ENSG00000109118	3844.81	-0.0727993	0.0357321	-2.03736	0.0416138	0.541583	PHF12	No	No	No
ENSG00000141552	1702.81	-0.0599935	0.0294564	-2.03669	0.0416816	0.541583	ANAPC11	No	No	No
ENSG00000180448	28708.7	0.0738846	0.0362937	2.03574	0.0417763	0.541583	ARHGAP45	No	No	No
ENSG00000260916	2135.33	-0.147933	0.0727082	-2.03462	0.0418894	0.541583	CCPG1	No	No	No
ENSG00000083799	22851.9	0.0853959	0.0419771	2.03435	0.0419168	0.541583	CYLD	No	No	No
ENSG00000139218	7782.79	0.079228	0.0389464	2.03429	0.0419228	0.541583	SCAF11	No	No	No
ENSG00000135365	1693.69	-0.0742078	0.0364904	-2.03362	0.0419895	0.541583	PHF21A	No	No	No
ENSG00000160213	4294.95	-0.118051	0.0580508	-2.03357	0.0419946	0.541583	CSTB	No	No	No
ENSG00000099331	4936.74	-0.0935247	0.0459906	-2.03356	0.0419958	0.541583	MYO9B	No	No	No
ENSG00000101347	30200.7	0.0996975	0.0490533	2.03243	0.04211	0.541583	SAMHD1	No	No	No
ENSG00000275052	8690.24	0.0692197	0.0340582	2.03239	0.0421138	0.541583	PPP4R3B	No	No	No
ENSG00000134970	2990.06	0.0823686	0.0405336	2.03211	0.0421428	0.541583	TMED7	No	No	No
ENSG00000176390	7345.38	0.0902275	0.0444658	2.02914	0.0424439	0.544187	CRLF3	No	No	No
ENSG00000154727	3404.03	0.0662711	0.032683	2.02769	0.0425915	0.544816	GABPA	No	No	No
ENSG00000108848	2598.45	-0.0957924	0.0472806	-2.02604	0.0427608	0.545355	LUC7L3	No	No	No
ENSG00000058668	7711.73	-0.0889532	0.0439198	-2.02535	0.042831	0.545355	ATP2B4	No	No	No
ENSG00000163328	1441.03	0.12978	0.0641281	2.02377	0.0429943	0.546176	GPR155	No	No	No
ENSG00000162402	5340.12	0.0793734	0.0392717	2.02114	0.0432657	0.546234	USP24	No	No	No
ENSG00000181924	1436.87	-0.0648305	0.0320801	-2.02089	0.0432907	0.546234	COA4	No	No	No
ENSG00000175105	1517.5	0.0748792	0.0370807	2.01936	0.0434498	0.546234	ZNF654	No	No	No
ENSG00000165732	7527.11	0.0645901	0.0319968	2.01864	0.0435246	0.546234	DDX21	No	No	No
ENSG00000127445	2206.79	-0.0845351	0.0418789	-2.01856	0.043533	0.546234	PIN1	No	No	No
ENSG00000198242	63813.4	-0.0635392	0.0314863	-2.01799	0.0435919	0.546234	RPL23A	No	No	No
ENSG00000165632	1466.94	-0.0774887	0.0384941	-2.013	0.0441142	0.54738	TAF3	No	No	No
ENSG00000254838	8865.73	0.123217	0.0612116	2.01297	0.0441179	0.54738	GVINP1	No	No	No
ENSG00000100092	6090.7	-0.0982124	0.0488289	-2.01136	0.0442878	0.54738	SH3BP1	No	No	No
ENSG00000137642	27031	0.0927143	0.046135	2.00963	0.0444702	0.54738	SORL1	No	No	No
ENSG00000015479	20119.3	0.055808	0.027774	2.00936	0.0444991	0.54738	MATR3	No	No	No
ENSG00000048707	4369.48	0.0793991	0.0395259	2.00879	0.0445599	0.54738	VPS13D	No	No	No
ENSG00000138660	1761.34	0.0837771	0.0417185	2.00815	0.0446271	0.54738	AP1AR	No	No	No
ENSG00000008869	2939.77	0.0803407	0.0400335	2.00683	0.0447674	0.54738	HEATR5B	No	No	No
ENSG00000092841	35438.1	-0.0637572	0.03178	-2.00621	0.0448341	0.54738	MYL6	No	No	No
ENSG00000156804	2070.28	0.210027	0.104695	2.00608	0.0448479	0.54738	FBXO32	No	No	No
ENSG00000127184	23319.1	-0.0565106	0.0281728	-2.00586	0.0448717	0.54738	COX7C	No	No	No
ENSG00000103275	6429.88	-0.0460691	0.0229699	-2.00563	0.0448959	0.54738	UBE2I	No	No	No
ENSG00000096433	2284.37	-0.100775	0.0502637	-2.00492	0.0449712	0.54738	ITPR3	No	No	No
ENSG00000108509	2774.68	-0.115019	0.0574927	-2.00058	0.0454376	0.550194	CAMTA2	No	No	No
ENSG00000109919	1683.05	-0.064754	0.0323857	-1.99946	0.0455587	0.550194	MTCH2	No	No	No
ENSG00000105397	2658.87	-0.0621658	0.0310919	-1.99942	0.0455626	0.550194	TYK2	No	No	No
ENSG00000110848	3319.1	0.291517	0.145906	1.99797	0.0457194	0.550194	CD69	No	No	No
ENSG00000106803	3163.83	-0.0763496	0.0382136	-1.99797	0.04572	0.550194	SEC61B	No	No	No
ENSG00000118482	5393.5	0.0840859	0.0421012	1.99723	0.0457997	0.550194	PHF3	No	No	No
ENSG00000163513	15415.5	0.0850613	0.0427217	1.99106	0.0464747	0.555997	TGFBR2	No	No	No
ENSG00000066933	1540.18	0.0938587	0.0471421	1.99097	0.046484	0.555997	MYO9A	No	No	No
ENSG00000106609	7679.32	0.0436662	0.0219607	1.98837	0.0467704	0.557824	TMEM248	No	No	No
ENSG00000073614	2486.43	0.10773	0.0541966	1.98776	0.0468386	0.557824	KDM5A	No	No	No
ENSG00000179295	5326.09	0.0640021	0.0322527	1.9844	0.0472116	0.558091	PTPN11	No	No	No
ENSG00000181852	2336.23	0.061496	0.0309935	1.98416	0.0472379	0.558091	RNF41	No	No	No
ENSG00000005059	8041.54	0.0921665	0.0464812	1.98288	0.0473809	0.558091	MCUB	No	No	No
ENSG00000139722	2206.98	-0.0851117	0.0429528	-1.98152	0.0475333	0.558091	VPS37B	No	No	No
ENSG00000130402	7603.95	-0.108185	0.0546002	-1.98139	0.047547	0.558091	ACTN4	No	No	No
ENSG00000110713	5808.74	0.0570636	0.0288078	1.98084	0.0476093	0.558091	NUP98	No	No	No
ENSG00000179526	1626.79	-0.0786977	0.0397357	-1.98053	0.0476444	0.558091	SHARPIN	No	No	No
ENSG00000102119	2638.38	-0.0860951	0.0434915	-1.97958	0.0477502	0.558091	EMD	No	No	No
ENSG00000131242	2539.08	0.0760676	0.0384294	1.97941	0.04777	0.558091	RAB11FIP4	No	No	No
ENSG00000125166	2624	-0.0738654	0.0373422	-1.97807	0.047921	0.558674	GOT2	No	No	No
ENSG00000134242	2342.89	-0.0828572	0.0419383	-1.97569	0.0481897	0.55896	PTPN22	No	No	No
ENSG00000125503	2319.35	-0.078585	0.039781	-1.97544	0.048218	0.55896	PPP1R12C	No	No	No
ENSG00000117899	3552.38	-0.0516286	0.0261388	-1.97517	0.048249	0.55896	MESDC2	No	No	No
ENSG00000113615	1569.78	0.0807929	0.0409972	1.97069	0.0487593	0.562581	SEC24A	No	No	No
ENSG00000164985	13055.7	0.0581267	0.0295069	1.96993	0.0488461	0.562581	PSIP1	No	No	No
ENSG00000170860	2446.87	-0.0640014	0.0324921	-1.96975	0.048867	0.562581	LSM3	No	No	No
ENSG00000089063	6391.73	-0.0893784	0.0454344	-1.9672	0.0491607	0.564785	TMEM230	No	No	No
ENSG00000197006	7112.77	0.0943124	0.0479972	1.96496	0.0494193	0.566579	METTL9	No	No	No
ENSG00000167395	1513.43	-0.0895218	0.0456347	-1.96171	0.0497967	0.569723	ZNF646	No	No	No
ENSG00000132465	12347.6	0.409616	0.209382	1.95631	0.0504287	0.569935	JCHAIN	No	No	No
ENSG00000174748	121892	0.057645	0.0294724	1.9559	0.0504769	0.569935	RPL15	No	No	No
ENSG00000137871	1755.92	0.0726625	0.0371584	1.95548	0.0505266	0.569935	ZNF280D	No	No	No
ENSG00000109452	7599.14	0.161426	0.082563	1.95518	0.0505617	0.569935	INPP4B	No	No	No
ENSG00000198840	103796	0.120852	0.061817	1.955	0.0505834	0.569935	MT-ND3	No	No	No
ENSG00000274752	1928.32	-0.146402	0.07489	-1.9549	0.0505951	0.569935	AC244196.1	No	No	No
ENSG00000114439	3441.38	0.10137	0.0518657	1.95447	0.0506452	0.569935	BBX	No	No	No
ENSG00000090372	1718.45	-0.0960271	0.0491428	-1.95404	0.0506963	0.569935	STRN4	No	No	No
ENSG00000103335	4302.08	-0.133717	0.0684712	-1.95289	0.0508322	0.569935	PIEZO1	No	No	No
ENSG00000230034	1903.96	-1.36556	0.699292	-1.95277	0.0508466	0.569935	PSMB8	No	No	No
ENSG00000122122	11835.4	-0.0702829	0.0360188	-1.95129	0.051023	0.570447	SASH3	No	No	No
ENSG00000138326	102016	0.0827893	0.0424472	1.95041	0.0511276	0.570447	RPS24	No	No	No
ENSG00000115685	3766.25	-0.0519353	0.0266473	-1.94898	0.0512973	0.570447	PPP1R7	No	No	No
ENSG00000163221	1433.91	-0.470968	0.241656	-1.94892	0.0513052	0.570447	S100A12	No	No	No
ENSG00000129355	3298.18	-0.117634	0.0604507	-1.94596	0.0516601	0.572055	CDKN2D	No	No	No
ENSG00000144815	5311.67	0.110593	0.0568873	1.94408	0.0518864	0.572055	NXPE3	No	No	No
ENSG00000170242	3850.76	0.083907	0.0431621	1.944	0.0518956	0.572055	USP47	No	No	No
ENSG00000164163	4870.89	0.0555435	0.0285992	1.94213	0.052121	0.572055	ABCE1	No	No	No
ENSG00000078596	12217.3	-0.174749	0.0900124	-1.94139	0.0522114	0.572055	ITM2A	No	No	No
ENSG00000116649	2314.41	-0.0863216	0.0444753	-1.94089	0.052272	0.572055	SRM	No	No	No
ENSG00000100348	3090.41	-0.073176	0.0377056	-1.94072	0.0522921	0.572055	TXN2	No	No	No
ENSG00000182903	1797.97	0.109268	0.0563095	1.94049	0.05232	0.572055	ZNF721	No	No	No
ENSG00000172780	6483.96	0.117929	0.0608005	1.93961	0.0524272	0.572055	RAB43	No	No	No
ENSG00000124541	1550.16	-0.0534859	0.0275917	-1.93848	0.0525646	0.572055	RRP36	No	No	No
ENSG00000259781	3256.81	0.125276	0.064646	1.93789	0.0526372	0.572055	HMGB1P6	No	No	No
ENSG00000082641	4882.15	0.0499648	0.0257949	1.93701	0.0527447	0.572055	NFE2L1	No	No	No
ENSG00000032219	2113.81	0.0852396	0.0440153	1.93659	0.0527956	0.572055	ARID4A	No	No	No
ENSG00000011260	3023.95	0.0698134	0.0360936	1.93423	0.0530846	0.573975	UTP18	No	No	No
ENSG00000228300	2046.78	-0.0813353	0.0420955	-1.93216	0.0533398	0.573975	C19orf24	No	No	No
ENSG00000137106	2215.96	0.158622	0.0820983	1.93209	0.0533478	0.573975	GRHPR	No	No	No
ENSG00000084092	2481.57	0.056347	0.0291744	1.93139	0.0534351	0.573975	NOA1	No	No	No
ENSG00000178057	2083.5	-0.0938689	0.048642	-1.92979	0.0536325	0.573975	NDUFAF3	No	No	No
ENSG00000127947	2016.67	-0.212361	0.110051	-1.92966	0.0536487	0.573975	PTPN12	No	No	No
ENSG00000117592	6004.95	-0.0983252	0.0509655	-1.92925	0.0536998	0.573975	PRDX6	No	No	No
ENSG00000127922	3154.92	-0.0742923	0.0385359	-1.92787	0.0538711	0.574695	SEM1	No	No	No
ENSG00000136827	2800.65	0.0597115	0.0310133	1.92535	0.054185	0.576252	TOR1A	No	No	No
ENSG00000064961	2096.84	-0.0726741	0.0377522	-1.92503	0.0542256	0.576252	HMG20B	No	No	No
ENSG00000164405	2218.38	-0.0653739	0.0339777	-1.92402	0.0543519	0.576425	UQCRQ	No	No	No
ENSG00000101849	2602.96	0.0822871	0.0427858	1.92323	0.0544506	0.576425	TBL1X	No	No	No
ENSG00000146463	1849.42	0.0834853	0.0434564	1.92113	0.0547153	0.577581	ZMYM4	No	No	No
ENSG00000221963	5499.19	0.166326	0.086637	1.9198	0.0548832	0.577581	APOL6	No	No	No
ENSG00000151366	3360.34	-0.0587929	0.0306359	-1.91909	0.0549735	0.577581	NDUFC2	No	No	No
ENSG00000138964	3032.08	-0.0628678	0.0327832	-1.91768	0.055151	0.577581	PARVG	No	No	No
ENSG00000158417	5563.59	-0.067324	0.0351301	-1.91642	0.055312	0.577581	EIF5B	No	No	No
ENSG00000198837	3586.75	-0.0750834	0.0391907	-1.91585	0.0553846	0.577581	DENND4B	No	No	No
ENSG00000115760	6397.34	0.088464	0.0461896	1.91524	0.0554623	0.577581	BIRC6	No	No	No
ENSG00000142327	7875.67	-0.0727384	0.0379813	-1.91511	0.0554784	0.577581	RNPEPL1	No	No	No
ENSG00000183475	1869.13	0.0578747	0.0302228	1.91494	0.0555005	0.577581	ASB7	No	No	No
ENSG00000106400	2527.48	-0.0833863	0.0436796	-1.90904	0.0562567	0.582642	ZNHIT1	No	No	No
ENSG00000140941	5259.4	-0.050753	0.0265954	-1.90834	0.0563476	0.582642	MAP1LC3B	No	No	No
ENSG00000066777	4812.48	0.0504576	0.0264453	1.908	0.0563914	0.582642	ARFGEF1	No	No	No
ENSG00000105254	3148.25	-0.0598258	0.0313733	-1.90691	0.0565329	0.582642	TBCB	No	No	No
ENSG00000172175	6175.78	0.0969232	0.0508351	1.90662	0.0565701	0.582642	MALT1	No	No	No
ENSG00000125686	4061.34	0.0623252	0.0326954	1.90624	0.0566194	0.582642	MED1	No	No	No
ENSG00000197555	1519.37	-0.0787029	0.041372	-1.90232	0.0571289	0.583026	SIPA1L1	No	No	No
ENSG00000172262	3089.91	0.058717	0.0308687	1.90215	0.0571511	0.583026	ZNF131	No	No	No
ENSG00000092036	2068.08	-0.0973194	0.0511671	-1.90199	0.0571724	0.583026	HAUS4	No	No	No
ENSG00000170854	1737.02	0.0689285	0.0362518	1.90138	0.0572523	0.583026	RIOX2	No	No	No
ENSG00000137486	1785.94	-0.10373	0.0545594	-1.90123	0.0572716	0.583026	ARRB1	No	No	No
ENSG00000197343	3839.54	0.0488192	0.0256795	1.90109	0.0572897	0.583026	ZNF655	No	No	No
ENSG00000071553	4637.93	-0.0489254	0.0257527	-1.89981	0.0574576	0.583659	ATP6AP1	No	No	No
ENSG00000197226	3948.19	-0.0794018	0.0418451	-1.89752	0.0577598	0.583739	TBC1D9B	No	No	No
ENSG00000113712	8407.25	0.0459494	0.024216	1.89748	0.0577642	0.583739	CSNK1A1	No	No	No
ENSG00000173757	15434.5	0.0384469	0.0202696	1.89678	0.0578574	0.583739	STAT5B	No	No	No
ENSG00000169762	1713.88	0.0589067	0.0310641	1.89629	0.0579211	0.583739	TAPT1	No	No	No
ENSG00000132953	2019.92	0.0672863	0.0354933	1.89575	0.0579936	0.583739	XPO4	No	No	No
ENSG00000171148	4616.87	-0.0618477	0.0326722	-1.89298	0.0583608	0.585877	TADA3	No	No	No
ENSG00000101856	2406.05	-0.177413	0.0937431	-1.89255	0.058418	0.585877	PGRMC1	No	No	No
ENSG00000099624	3130.51	-0.0997523	0.0527602	-1.89067	0.0586679	0.586892	ATP5D	No	No	No
ENSG00000166170	3257.25	0.0556239	0.0294519	1.88864	0.0589407	0.586892	BAG5	No	No	No
ENSG00000066654	4316.21	0.0566693	0.0300058	1.88861	0.0589439	0.586892	THUMPD1	No	No	No
ENSG00000088247	6039.13	-0.054943	0.0291047	-1.88777	0.0590571	0.586892	KHSRP	No	No	No
ENSG00000177463	3128.22	0.0724752	0.0384428	1.88528	0.0593924	0.586892	NR2C2	No	No	No
ENSG00000167930	1398.66	-0.0740219	0.0392828	-1.88433	0.05952	0.586892	FAM234A	No	No	No
ENSG00000158711	4200.61	0.0807729	0.0428676	1.88424	0.0595321	0.586892	ELK4	No	No	No
ENSG00000130332	2216.41	0.0598584	0.0317699	1.88412	0.0595483	0.586892	LSM7	No	No	No
ENSG00000123066	4652.39	0.0634303	0.0336683	1.88397	0.0595684	0.586892	MED13L	No	No	No
ENSG00000119403	2615.79	-0.063589	0.0337765	-1.88264	0.0597496	0.586892	PHF19	No	No	No
ENSG00000047849	4170.15	-0.09056	0.04815	-1.88079	0.0600008	0.586892	MAP4	No	No	No
ENSG00000122033	1657.83	-0.0799535	0.0425108	-1.88078	0.0600016	0.586892	MTIF3	No	No	No
ENSG00000116918	3537.65	0.0621599	0.0330571	1.88038	0.0600564	0.586892	TSNAX	No	No	No
ENSG00000115091	23987.6	0.0488652	0.0259958	1.87973	0.0601446	0.586892	ACTR3	No	No	No
ENSG00000110066	3195.69	0.0464835	0.0247613	1.87727	0.0604816	0.586892	KMT5B	No	No	No
ENSG00000186395	2168.02	-0.0855877	0.0455997	-1.87694	0.060527	0.586892	KRT10	No	No	No
ENSG00000101082	3703.01	-0.0950397	0.0506451	-1.87658	0.0605755	0.586892	SLA2	No	No	No
ENSG00000076924	2971.03	0.0767831	0.0409217	1.87634	0.0606086	0.586892	XAB2	No	No	No
ENSG00000117153	1606.28	-0.0580054	0.0309362	-1.875	0.0607924	0.586892	KLHL12	No	No	No
ENSG00000122042	6842.75	0.0970019	0.0517359	1.87494	0.0608004	0.586892	UBL3	No	No	No
ENSG00000107829	2429.07	-0.0707811	0.0377622	-1.87439	0.0608765	0.586892	FBXW4	No	No	No
ENSG00000197102	8037.53	0.0878406	0.0468804	1.87372	0.0609696	0.586892	DYNC1H1	No	No	No
ENSG00000150459	7180.28	-0.0471179	0.0251535	-1.87322	0.0610382	0.586892	SAP18	No	No	No
ENSG00000148154	2083.58	0.137062	0.0732169	1.872	0.061207	0.586892	UGCG	No	No	No
ENSG00000108523	7345.52	-0.0596503	0.0319036	-1.8697	0.0615249	0.586892	RNF167	No	No	No
ENSG00000101608	44557.8	-0.046291	0.024762	-1.86944	0.0615622	0.586892	MYL12A	No	No	No
ENSG00000055917	12912.5	0.0524134	0.0280377	1.86939	0.0615684	0.586892	PUM2	No	No	No
ENSG00000171492	4181.61	0.081046	0.043373	1.86858	0.0616808	0.586892	LRRC8D	No	No	No
ENSG00000126903	1767.57	-0.0792176	0.0424255	-1.86722	0.0618711	0.586892	SLC10A3	No	No	No
ENSG00000152601	33512.4	0.0856458	0.0458705	1.86712	0.0618847	0.586892	MBNL1	No	No	No
ENSG00000109320	5775.84	0.101441	0.0543511	1.86639	0.0619865	0.586892	NFKB1	No	No	No
ENSG00000057757	3227.08	0.0529423	0.0283917	1.86471	0.0622222	0.586892	PITHD1	No	No	No
ENSG00000106028	3377.67	-0.0595978	0.0319673	-1.86433	0.0622749	0.586892	SSBP1	No	No	No
ENSG00000126860	10233.1	0.108949	0.0584888	1.86273	0.0625	0.586892	EVI2A	No	No	No
ENSG00000154122	6003.1	0.0633245	0.0340065	1.86213	0.0625851	0.586892	ANKH	No	No	No
ENSG00000132359	1524.1	-0.122577	0.0659468	-1.85872	0.0630671	0.586892	RAP1GAP2	No	No	No
ENSG00000113732	10111.7	-0.0456314	0.0245608	-1.8579	0.0631836	0.586892	ATP6V0E1	No	No	No
ENSG00000079313	1944.31	-0.0997023	0.0536847	-1.85718	0.063285	0.586892	REXO1	No	No	No
ENSG00000239264	5188.02	0.255686	0.13772	1.85656	0.0633743	0.586892	TXNDC5	No	No	No
ENSG00000116237	2468.06	-0.0737903	0.0397491	-1.8564	0.063396	0.586892	ICMT	No	No	No
ENSG00000185236	3945.58	-0.0773597	0.0416744	-1.85629	0.0634121	0.586892	RAB11B	No	No	No
ENSG00000108518	71768.9	-0.0616661	0.0332263	-1.85594	0.063462	0.586892	PFN1	No	No	No
ENSG00000023902	4949.78	-0.106067	0.0571689	-1.85532	0.0635504	0.586892	PLEKHO1	No	No	No
ENSG00000154027	2555.78	0.176151	0.0949554	1.85509	0.0635827	0.586892	AK5	No	No	No
ENSG00000111615	1783.14	0.0730972	0.0394227	1.85419	0.0637119	0.586892	KRR1	No	No	No
ENSG00000105698	7546.91	-0.0885961	0.0477994	-1.8535	0.0638113	0.586892	USF2	No	No	No
ENSG00000135945	1716.38	0.0808617	0.0436297	1.85336	0.0638305	0.586892	REV1	No	No	No
ENSG00000118412	3206.36	0.100976	0.0544904	1.85309	0.0638695	0.586892	CASP8AP2	No	No	No
ENSG00000110324	19902.7	-0.0820125	0.0442573	-1.85308	0.0638704	0.586892	IL10RA	No	No	No
ENSG00000197956	20071.8	-0.0800184	0.0431882	-1.85278	0.0639133	0.586892	S100A6	No	No	No
ENSG00000211679	2217.44	0.392532	0.211906	1.85238	0.0639706	0.586892	IGLC3	No	No	No
ENSG00000185787	18210	0.0449277	0.024265	1.85154	0.0640918	0.586892	MORF4L1	No	No	No
ENSG00000146285	2678.74	0.118996	0.0643139	1.85024	0.064279	0.586892	SCML4	No	No	No
ENSG00000184014	5352.11	0.111383	0.0602265	1.84941	0.064399	0.586892	DENND5A	No	No	No
ENSG00000213203	13738.6	0.0796844	0.0431008	1.84879	0.064488	0.586892	GIMAP1	No	No	No
ENSG00000113845	1769.68	-0.056028	0.0303127	-1.84833	0.0645539	0.586892	TIMMDC1	No	No	No
ENSG00000175602	3477.56	0.0679448	0.0367667	1.848	0.0646027	0.586892	CCDC85B	No	No	No
ENSG00000129562	6123.86	-0.0698892	0.0378582	-1.84608	0.0648804	0.586892	DAD1	No	No	No
ENSG00000072062	2966.35	-0.0721691	0.039094	-1.84604	0.0648861	0.586892	PRKACA	No	No	No
ENSG00000168159	4500.25	-0.0869499	0.0471017	-1.846	0.0648916	0.586892	RNF187	No	No	No
ENSG00000134294	7205.55	0.0917775	0.0497408	1.84511	0.065021	0.587102	SLC38A2	No	No	No
ENSG00000166783	4673.39	0.0997841	0.0541109	1.84407	0.0651732	0.587331	MARF1	No	No	No
ENSG00000013441	4539.93	0.0929211	0.0504736	1.84098	0.065624	0.587331	CLK1	No	No	No
ENSG00000147140	17026.1	0.051052	0.0277311	1.84096	0.0656268	0.587331	NONO	No	No	No
ENSG00000132581	2049.75	-0.0536098	0.0291373	-1.8399	0.0657825	0.587331	SDF2	No	No	No
ENSG00000101266	4475.85	0.058089	0.0315888	1.83891	0.0659282	0.587331	CSNK2A1	No	No	No
ENSG00000156508	2.00737e+06	0.0663578	0.0360931	1.83852	0.0659858	0.587331	EEF1A1	No	No	No
ENSG00000100084	2637.03	-0.0515386	0.0280332	-1.83848	0.065991	0.587331	HIRA	No	No	No
ENSG00000068308	3170.52	-0.0591386	0.0321729	-1.83815	0.0660404	0.587331	OTUD5	No	No	No
ENSG00000136811	1793.32	-0.0903216	0.0491391	-1.83808	0.0660503	0.587331	ODF2	No	No	No
ENSG00000108443	2429.62	0.0603307	0.0328504	1.83653	0.0662794	0.587331	RPS6KB1	No	No	No
ENSG00000109062	13335.2	-0.0658816	0.0358839	-1.83597	0.0663627	0.587331	SLC9A3R1	No	No	No
ENSG00000108424	8675.41	0.0510179	0.0277968	1.83538	0.0664488	0.587331	KPNB1	No	No	No
ENSG00000156531	1628.05	0.0678793	0.0370081	1.83418	0.0666279	0.587331	PHF6	No	No	No
ENSG00000088832	6890.64	-0.0651382	0.0355138	-1.83417	0.0666294	0.587331	FKBP1A	No	No	No
ENSG00000121851	4138.17	0.0492962	0.0268777	1.83409	0.0666407	0.587331	POLR3GL	No	No	No
ENSG00000281571	2100.94	-0.0956489	0.0522432	-1.83084	0.0671243	0.590492	AC241585.3	No	No	No
ENSG00000083844	1537.22	0.0788322	0.0430719	1.83025	0.0672131	0.590492	ZNF264	No	No	No
ENSG00000172239	2479.5	0.0466753	0.0255359	1.82783	0.0675757	0.592736	PAIP1	No	No	No
ENSG00000198198	1989.89	-0.0845968	0.0463522	-1.82509	0.0679876	0.595403	SZT2	No	No	No
ENSG00000142230	6609.42	0.0714024	0.0392244	1.82036	0.0687046	0.600731	SAE1	No	No	No
ENSG00000185811	30584.9	0.0515445	0.0283431	1.81859	0.0689741	0.602134	IKZF1	No	No	No
ENSG00000174574	8372.85	0.0612757	0.0337315	1.81657	0.0692828	0.603875	AKIRIN1	No	No	No
ENSG00000005194	2714.06	0.115412	0.0635733	1.81542	0.0694595	0.604462	CIAPIN1	No	No	No
ENSG00000134717	3072.67	0.0602255	0.033202	1.81391	0.0696913	0.604657	BTF3L4	No	No	No
ENSG00000100243	3788.09	-0.111309	0.0613664	-1.81385	0.0697008	0.604657	CYB5R3	No	No	No
ENSG00000158717	4273.69	-0.107642	0.0593915	-1.81242	0.0699213	0.605353	RNF166	No	No	No
ENSG00000160094	1455.18	-0.0826748	0.0456317	-1.81178	0.0700197	0.605353	ZNF362	No	No	No
ENSG00000136152	1970.08	0.0643214	0.0355131	1.8112	0.0701097	0.605353	COG3	No	No	No
ENSG00000197183	2183.37	-0.103413	0.0571645	-1.80904	0.0704446	0.606945	NOL4L	No	No	No
ENSG00000137076	25976.8	-0.0893522	0.0494042	-1.8086	0.0705137	0.606945	TLN1	No	No	No
ENSG00000233476	1651.66	0.0971241	0.0537392	1.80732	0.0707121	0.607707	EEF1A1P6	No	No	No
ENSG00000197471	10414.1	-0.0897586	0.0497246	-1.80512	0.0710566	0.608989	SPN	No	No	No
ENSG00000126216	1567.92	0.0443998	0.0246218	1.80327	0.0713451	0.608989	TUBGCP3	No	No	No
ENSG00000110075	3817.52	0.0559878	0.0310653	1.80226	0.0715039	0.608989	PPP6R3	No	No	No
ENSG00000182957	7732.56	0.0743623	0.041299	1.80058	0.0717687	0.608989	SPATA13	No	No	No
ENSG00000105819	3983.02	0.0629383	0.0349738	1.79959	0.0719261	0.608989	PMPCB	No	No	No
ENSG00000112787	2585.56	-0.0923888	0.0513497	-1.79921	0.0719858	0.608989	FBRSL1	No	No	No
ENSG00000163875	4457.94	0.0729342	0.0405375	1.79918	0.0719903	0.608989	MEAF6	No	No	No
ENSG00000090615	1904.66	-0.0749904	0.0416877	-1.79886	0.072041	0.608989	GOLGA3	No	No	No
ENSG00000100823	7978.79	0.0648852	0.0360761	1.79857	0.0720875	0.608989	APEX1	No	No	No
ENSG00000178980	4778.33	-0.0621616	0.0345994	-1.79661	0.072398	0.608989	SELENOW	No	No	No
ENSG00000162980	3234.49	0.0803028	0.044697	1.7966	0.0723987	0.608989	ARL5A	No	No	No
ENSG00000137876	10636	0.0734933	0.0409091	1.7965	0.0724148	0.608989	RSL24D1	No	No	No
ENSG00000083828	1857.45	0.063338	0.0352774	1.79542	0.0725861	0.608989	ZNF586	No	No	No
ENSG00000235162	1714.92	-0.146569	0.0816542	-1.795	0.0726545	0.608989	C12orf75	No	No	No
ENSG00000184887	1802.17	-0.0693496	0.0386565	-1.794	0.0728139	0.608989	BTBD6	No	No	No
ENSG00000103423	1948.81	0.0761325	0.0424393	1.79392	0.0728267	0.608989	DNAJA3	No	No	No
ENSG00000159216	5906.19	0.0647146	0.036076	1.79384	0.0728383	0.608989	RUNX1	No	No	No
ENSG00000081320	20572.2	0.0842814	0.0469866	1.79373	0.0728556	0.608989	STK17B	No	No	No
ENSG00000069493	6776.36	0.0944398	0.0526681	1.79311	0.0729552	0.608989	CLEC2D	No	No	No
ENSG00000005075	2507.5	-0.0660171	0.0369157	-1.78832	0.0737242	0.613538	POLR2J	No	No	No
ENSG00000275035	1655.59	-0.0956817	0.053527	-1.78754	0.0738499	0.613538	CCDC92	No	No	No
ENSG00000111802	3216.77	0.050989	0.0285319	1.78709	0.0739233	0.613538	TDP2	No	No	No
ENSG00000119138	3839.59	0.157559	0.0882153	1.78607	0.0740878	0.613538	KLF9	No	No	No
ENSG00000005486	2398.71	-0.0888315	0.0497484	-1.78562	0.0741615	0.613538	RHBDD2	No	No	No
ENSG00000151465	2819.11	-0.055109	0.0308858	-1.78428	0.074378	0.613538	CDC123	No	No	No
ENSG00000128245	3516.57	-0.0975149	0.0547244	-1.78193	0.0747609	0.613538	YWHAH	No	No	No
ENSG00000183172	1391.88	0.33903	0.190287	1.78167	0.0748025	0.613538	SMDT1	No	No	No
ENSG00000272835	1391.88	0.33903	0.190287	1.78167	0.0748025	0.613538	SMDT1	No	No	No
ENSG00000274112	1391.88	0.33903	0.190287	1.78167	0.0748025	0.613538	SMDT1	No	No	No
ENSG00000125971	4501.14	-0.0722859	0.0405753	-1.78153	0.0748264	0.613538	DYNLRB1	No	No	No
ENSG00000135426	10553.4	0.0776191	0.0435698	1.78149	0.0748326	0.613538	TESPA1	No	No	No
ENSG00000198839	2302.9	0.094521	0.0530837	1.7806	0.0749775	0.613565	ZNF277	No	No	No
ENSG00000120451	2703.78	0.103512	0.0581706	1.77946	0.0751643	0.613565	SNX19	No	No	No
ENSG00000106460	4039.97	0.0760629	0.0427456	1.77943	0.075169	0.613565	TMEM106B	No	No	No
ENSG00000171791	16430.1	0.128348	0.0721738	1.77831	0.0753523	0.614154	BCL2	No	No	No
ENSG00000211746	2525.45	0.11288	0.0635442	1.77639	0.0756681	0.61582	TRBV19	No	No	No
ENSG00000131558	3191.46	0.0635173	0.0358491	1.7718	0.0764278	0.621089	EXOC4	No	No	No
ENSG00000033178	1560.44	0.114846	0.0648967	1.76967	0.0767814	0.622082	UBA6	No	No	No
ENSG00000163605	3851.39	0.0664292	0.037553	1.76895	0.076903	0.622082	PPP4R2	No	No	No
ENSG00000135916	4393.11	0.126549	0.071547	1.76876	0.076934	0.622082	ITM2C	No	No	No
ENSG00000083642	1970.95	0.0949058	0.0536687	1.76836	0.0770004	0.622082	PDS5B	No	No	No
ENSG00000101639	1714.23	0.1139	0.0645867	1.76353	0.077812	0.627392	CEP192	No	No	No
ENSG00000099875	10578.1	-0.0638781	0.0362435	-1.76247	0.0779898	0.627392	MKNK2	No	No	No
ENSG00000213983	2592.46	-0.096259	0.0546175	-1.76242	0.0779983	0.627392	AP1G2	No	No	No
ENSG00000155313	4107.45	0.0572837	0.0325205	1.76146	0.0781602	0.627781	USP25	No	No	No
ENSG00000196177	2276.71	0.0695347	0.0395132	1.75978	0.0784446	0.628918	ACADSB	No	No	No
ENSG00000132467	2938.42	-0.0782966	0.044506	-1.75924	0.0785373	0.628918	UTP3	No	No	No
ENSG00000155508	8627.21	0.0441929	0.025137	1.75808	0.0787332	0.628918	CNOT8	No	No	No
ENSG00000111412	2300.83	-0.0545637	0.0310435	-1.75765	0.0788066	0.628918	C12orf49	No	No	No
ENSG00000166822	1712.12	0.0757284	0.0431231	1.7561	0.0790716	0.628918	TMEM170A	No	No	No
ENSG00000023516	4066.17	0.0813697	0.0463444	1.75576	0.0791291	0.628918	AKAP11	No	No	No
ENSG00000118363	4731.79	-0.0467983	0.0266604	-1.75535	0.0791994	0.628918	SPCS2	No	No	No
ENSG00000115524	12691.6	0.064774	0.0369025	1.75528	0.0792122	0.628918	SF3B1	No	No	No
ENSG00000103994	3484.2	0.0733453	0.0418148	1.75405	0.0794216	0.628964	ZNF106	No	No	No
ENSG00000076641	7548.93	0.0882205	0.0503365	1.75261	0.0796682	0.628964	PAG1	No	No	No
ENSG00000107290	8351.46	0.0668886	0.038169	1.75243	0.0796994	0.628964	SETX	No	No	No
ENSG00000090238	4864.93	-0.0913861	0.0521603	-1.75202	0.0797698	0.628964	YPEL3	No	No	No
ENSG00000107175	1550.06	0.0461701	0.0263733	1.75063	0.080009	0.628964	CREB3	No	No	No
ENSG00000189159	3090.32	-0.0721224	0.0411981	-1.75063	0.0800101	0.628964	JPT1	No	No	No
ENSG00000124570	2038.22	-0.222941	0.127351	-1.7506	0.0800148	0.628964	SERPINB6	No	No	No
ENSG00000122085	3441.51	0.0860873	0.0493088	1.74588	0.0808314	0.633885	MTERF4	No	No	No
ENSG00000169976	3725.46	-0.0412863	0.023657	-1.7452	0.0809492	0.633885	SF3B5	No	No	No
ENSG00000111843	2291.51	0.0787804	0.0451721	1.74401	0.0811582	0.633885	TMEM14C	No	No	No
ENSG00000151135	3101.89	0.0979203	0.0561631	1.7435	0.0812463	0.633885	TMEM263	No	No	No
ENSG00000171862	8369.04	0.0613924	0.0352381	1.74221	0.0814708	0.633885	PTEN	No	No	No
ENSG00000129347	2571.32	-0.0663823	0.0381073	-1.74198	0.0815117	0.633885	KRI1	No	No	No
ENSG00000053371	1613.34	-0.0646114	0.0371125	-1.74096	0.0816905	0.633885	AKR7A2	No	No	No
ENSG00000126768	1499.1	-0.068762	0.0395247	-1.73972	0.0819079	0.633885	TIMM17B	No	No	No
ENSG00000242485	2762.33	-0.0534418	0.030738	-1.73862	0.0821008	0.633885	MRPL20	No	No	No
ENSG00000100883	2434.98	-0.0732762	0.0421783	-1.7373	0.0823351	0.633885	SRP54	No	No	No
ENSG00000065413	5163.15	0.109966	0.0633066	1.73703	0.0823819	0.633885	ANKRD44	No	No	No
ENSG00000205765	1631.98	0.0581226	0.0334633	1.7369	0.0824041	0.633885	C5orf51	No	No	No
ENSG00000203667	2811.19	-0.0579885	0.0334039	-1.73598	0.0825671	0.633885	COX20	No	No	No
ENSG00000058063	7906.31	0.058487	0.0337014	1.73545	0.0826617	0.633885	ATP11B	No	No	No
ENSG00000112200	2673.03	0.0784761	0.0452488	1.73433	0.0828603	0.633885	ZNF451	No	No	No
ENSG00000002586	11576.8	-0.132461	0.0763973	-1.73384	0.0829464	0.633885	CD99	No	No	No
ENSG00000055163	26670.3	0.0542799	0.0313241	1.73285	0.0831223	0.633885	CYFIP2	No	No	No
ENSG00000119541	4824.25	0.0557344	0.0321699	1.7325	0.0831846	0.633885	VPS4B	No	No	No
ENSG00000146540	1591.98	-0.169863	0.0980871	-1.73176	0.0833165	0.633885	C7orf50	No	No	No
ENSG00000167552	5602.47	0.0887089	0.0512883	1.72961	0.0836991	0.633885	TUBA1A	No	No	No
ENSG00000129250	1404.52	-0.086008	0.0497402	-1.72915	0.0837831	0.633885	KIF1C	No	No	No
ENSG00000213064	2416.27	0.0973342	0.0562984	1.7289	0.0838273	0.633885	SFT2D2	No	No	No
ENSG00000167315	2354.61	-0.144749	0.0837571	-1.7282	0.0839525	0.633885	ACAA2	No	No	No
ENSG00000133935	1659.61	-0.0516748	0.029907	-1.72785	0.0840149	0.633885	C14orf1	No	No	No
ENSG00000114391	80640	0.0613189	0.0355061	1.72699	0.0841687	0.633885	RPL24	No	No	No
ENSG00000196704	3094.22	-0.0481523	0.027884	-1.72688	0.084189	0.633885	AMZ2	No	No	No
ENSG00000126001	2331.28	-0.0786955	0.0455729	-1.72681	0.0842027	0.633885	CEP250	No	No	No
ENSG00000121691	5443.84	0.158282	0.091714	1.72582	0.0843805	0.633885	CAT	No	No	No
ENSG00000088766	1779.5	0.0478332	0.027723	1.7254	0.0844561	0.633885	CRLS1	No	No	No
ENSG00000110031	6744.3	-0.0965589	0.0559686	-1.72523	0.0844854	0.633885	LPXN	No	No	No
ENSG00000112531	3998.28	0.0575295	0.0333473	1.72516	0.0844982	0.633885	QKI	No	No	No
ENSG00000112679	1897.32	0.0579293	0.0335864	1.72478	0.0845665	0.633885	DUSP22	No	No	No
ENSG00000103111	2557.73	-0.0547391	0.0317694	-1.72301	0.0848865	0.633885	MON1B	No	No	No
ENSG00000129055	2338.03	-0.0813931	0.0472428	-1.72287	0.0849127	0.633885	ANAPC13	No	No	No
ENSG00000166477	1379.28	-0.0678414	0.0393788	-1.72279	0.0849269	0.633885	LEO1	No	No	No
ENSG00000138378	3332.43	-0.118175	0.0686176	-1.72223	0.0850273	0.633885	STAT4	No	No	No
ENSG00000187239	15528.9	-0.0434717	0.0252456	-1.72195	0.0850784	0.633885	FNBP1	No	No	No
ENSG00000112343	1788.04	-0.104028	0.0604176	-1.72182	0.0851029	0.633885	TRIM38	No	No	No
ENSG00000096060	16068.2	0.222103	0.128998	1.72175	0.0851145	0.633885	FKBP5	No	No	No
ENSG00000105329	17056.6	-0.103326	0.0600687	-1.72013	0.0854095	0.635226	TGFB1	No	No	No
ENSG00000120868	2007.35	0.071834	0.0417791	1.71937	0.0855462	0.635388	APAF1	No	No	No
ENSG00000135655	4112.55	0.0805668	0.0468928	1.71811	0.0857771	0.635777	USP15	No	No	No
ENSG00000108107	112125	-0.0918643	0.053485	-1.71757	0.0858748	0.635777	RPL28	No	No	No
ENSG00000172115	4313.25	-0.0560608	0.0326502	-1.71701	0.0859776	0.635777	CYCS	No	No	No
ENSG00000160058	2502.3	-0.0477957	0.0278438	-1.71656	0.0860589	0.635777	BSDC1	No	No	No
ENSG00000040933	7137.86	0.0591923	0.034504	1.71552	0.0862496	0.636335	INPP4A	No	No	No
ENSG00000198792	1457.64	-0.102605	0.0598442	-1.71454	0.0864292	0.636811	TMEM184B	No	No	No
ENSG00000130724	3350.35	-0.050155	0.0292758	-1.71319	0.086677	0.637786	CHMP2A	No	No	No
ENSG00000113649	1882.86	0.0449438	0.0263234	1.70737	0.0877533	0.643148	TCERG1	No	No	No
ENSG00000121879	2845.28	0.0670257	0.0392645	1.70703	0.087816	0.643148	PIK3CA	No	No	No
ENSG00000115128	2817.27	-0.0475918	0.0278907	-1.70637	0.0879395	0.643148	SF3B6	No	No	No
ENSG00000122515	1841.12	-0.0890147	0.052193	-1.70549	0.0881025	0.643148	ZMIZ2	No	No	No
ENSG00000110046	1533.16	-0.0567477	0.0332996	-1.70416	0.0883516	0.643148	ATG2A	No	No	No
ENSG00000165271	1961.2	0.0851685	0.0499769	1.70416	0.0883518	0.643148	NOL6	No	No	No
ENSG00000100814	1567.32	0.0736031	0.0432033	1.70364	0.0884475	0.643148	CCNB1IP1	No	No	No
ENSG00000185201	9825.33	-0.175121	0.10283	-1.70302	0.088564	0.643148	IFITM2	No	No	No
ENSG00000164086	2422.14	-0.0877778	0.0515474	-1.70286	0.088595	0.643148	DUSP7	No	No	No
ENSG00000127481	4912.72	0.0931645	0.0547208	1.70254	0.0886536	0.643148	UBR4	No	No	No
ENSG00000076770	2497.98	0.0598265	0.0351457	1.70224	0.0887103	0.643148	MBNL3	No	No	No
ENSG00000114120	1986.62	0.0669688	0.0393529	1.70175	0.0888024	0.643148	SLC25A36	No	No	No
ENSG00000278183	2904.39	0.213608	0.125607	1.70061	0.0890172	0.64386	ABCC1	No	No	No
ENSG00000145817	2118.44	0.0742003	0.0436586	1.69956	0.0892142	0.644441	YIPF5	No	No	No
ENSG00000105220	8890.12	-0.0448392	0.0264064	-1.69804	0.0894996	0.644916	GPI	No	No	No
ENSG00000163527	12893.8	0.0667529	0.0393162	1.69785	0.0895368	0.644916	STT3B	No	No	No
ENSG00000156860	6029.44	-0.0808124	0.0476207	-1.697	0.0896962	0.644916	FBRS	No	No	No
ENSG00000272333	3466.5	-0.0878076	0.0517509	-1.69674	0.0897467	0.644916	KMT2B	No	No	No
ENSG00000169375	6985.33	0.0428163	0.0252449	1.69604	0.0898786	0.644931	SIN3A	No	No	No
ENSG00000196504	4750.96	0.0575644	0.0339626	1.69493	0.0900884	0.644931	PRPF40A	No	No	No
ENSG00000116604	2897.94	-0.0739264	0.0436176	-1.69488	0.0900989	0.644931	MEF2D	No	No	No
ENSG00000102030	1704.3	-0.0600793	0.0355244	-1.69121	0.0907958	0.64692	NAA10	No	No	No
ENSG00000095370	3431.73	-0.0898336	0.0531327	-1.69074	0.0908864	0.64692	SH2D3C	No	No	No
ENSG00000022840	6670	-0.0365029	0.021592	-1.69057	0.0909183	0.64692	RNF10	No	No	No
ENSG00000184922	15307.3	-0.06861	0.0405841	-1.69056	0.0909201	0.64692	FMNL1	No	No	No
ENSG00000132405	5283.32	0.0500198	0.0295915	1.69034	0.0909622	0.64692	TBC1D14	No	No	No
ENSG00000185728	3389.9	0.0454353	0.0268936	1.68945	0.0911338	0.647308	YTHDF3	No	No	No
ENSG00000063245	2345.02	-0.0742175	0.0439655	-1.68808	0.091395	0.648329	EPN1	No	No	No
ENSG00000136810	2626.53	-0.0815002	0.0483084	-1.68708	0.0915881	0.648867	TXN	No	No	No
ENSG00000116288	8009.75	-0.0443071	0.0262973	-1.68485	0.0920174	0.650678	PARK7	No	No	No
ENSG00000102882	2610.56	-0.0763089	0.0453121	-1.68407	0.0921674	0.650678	MAPK3	No	No	No
ENSG00000145782	2204.49	0.0594232	0.0352886	1.68392	0.092197	0.650678	ATG12	No	No	No
ENSG00000278615	1707.75	-0.0669526	0.039795	-1.68244	0.0924839	0.65187	C11orf98	No	No	No
ENSG00000139651	3054.1	0.0606438	0.0360612	1.68169	0.0926289	0.65206	ZNF740	No	No	No
ENSG00000273611	2338.4	0.0560298	0.0333601	1.67954	0.0930464	0.652791	ZNHIT3	No	No	No
ENSG00000104442	2029.87	-0.0674309	0.0401607	-1.67903	0.0931469	0.652791	ARMC1	No	No	No
ENSG00000140718	1593.54	0.0615356	0.0366532	1.67886	0.0931795	0.652791	FTO	No	No	No
ENSG00000100385	6859.27	-0.123408	0.0735128	-1.67873	0.0932053	0.652791	IL2RB	No	No	No
ENSG00000158710	33974.8	-0.102595	0.0612325	-1.67549	0.0938375	0.653202	TAGLN2	No	No	No
ENSG00000154016	4209.4	0.0660791	0.0394461	1.67518	0.0938997	0.653202	GRAP	No	No	No
ENSG00000100083	1484.05	-0.0641653	0.0383046	-1.67513	0.0939083	0.653202	GGA1	No	No	No
ENSG00000111652	1377.48	-0.0547357	0.0326856	-1.67461	0.0940103	0.653202	COPS7A	No	No	No
ENSG00000162607	4774.42	0.0567885	0.0339165	1.67436	0.0940596	0.653202	USP1	No	No	No
ENSG00000131408	3961.82	-0.0493438	0.0294943	-1.67299	0.0943287	0.653202	NR1H2	No	No	No
ENSG00000261796	4612.51	0.084741	0.0506824	1.672	0.0945244	0.653202	ISY1-RAB43	No	No	No
ENSG00000166037	3571.07	0.061954	0.0370685	1.67134	0.094655	0.653202	CEP57	No	No	No
ENSG00000136051	3042.35	0.0721214	0.0431595	1.67104	0.0947131	0.653202	WASHC4	No	No	No
ENSG00000198862	1857.54	0.0730788	0.0437508	1.67034	0.0948517	0.653202	LTN1	No	No	No
ENSG00000163558	1780.21	0.0629404	0.0376873	1.67007	0.0949059	0.653202	PRKCI	No	No	No
ENSG00000015133	7857.72	-0.0675123	0.0404716	-1.66814	0.0952875	0.653202	CCDC88C	No	No	No
ENSG00000184900	5605.27	0.0769334	0.0461271	1.66786	0.0953444	0.653202	SUMO3	No	No	No
ENSG00000026103	1974.15	-0.158206	0.094883	-1.66738	0.0954394	0.653202	FAS	No	No	No
ENSG00000127022	21866.1	0.0504684	0.0302818	1.66663	0.0955885	0.653202	CANX	No	No	No
ENSG00000127526	2217.98	-0.0514526	0.0308785	-1.66629	0.0956553	0.653202	SLC35E1	No	No	No
ENSG00000158195	11167.2	0.0487023	0.0292586	1.66455	0.0960036	0.653202	WASF2	No	No	No
ENSG00000128294	2250.58	-0.110147	0.0661871	-1.66418	0.0960767	0.653202	TPST2	No	No	No
ENSG00000153201	6610.78	0.0707773	0.0425304	1.66416	0.0960809	0.653202	RANBP2	No	No	No
ENSG00000153094	2696.68	0.128445	0.0772659	1.66237	0.0964384	0.653202	BCL2L11	No	No	No
ENSG00000104325	3087.93	-0.0533356	0.0320854	-1.6623	0.0964526	0.653202	DECR1	No	No	No
ENSG00000070814	2668.21	-0.075343	0.045328	-1.66217	0.0964781	0.653202	TCOF1	No	No	No
ENSG00000114354	1614.5	-0.0418103	0.0251582	-1.6619	0.0965336	0.653202	TFG	No	No	No
ENSG00000153487	1837.46	-0.0554521	0.0333732	-1.66157	0.0965983	0.653202	ING1	No	No	No
ENSG00000198399	4463.55	0.046592	0.028042	1.6615	0.0966121	0.653202	ITSN2	No	No	No
ENSG00000105866	2680.65	0.0735431	0.0442724	1.66115	0.0966832	0.653202	SP4	No	No	No
ENSG00000052723	1519.57	0.0805929	0.0485205	1.66101	0.0967123	0.653202	SIKE1	No	No	No
ENSG00000164172	1674.69	0.066358	0.0399709	1.66016	0.0968831	0.653202	MOCS2	No	No	No
ENSG00000172466	5465.51	0.0623895	0.0376013	1.65924	0.0970684	0.653202	ZNF24	No	No	No
ENSG00000205250	3952.02	-0.0478469	0.0288547	-1.6582	0.0972771	0.653202	E2F4	No	No	No
ENSG00000140374	2881.19	-0.0509952	0.0307639	-1.65763	0.0973919	0.653202	ETFA	No	No	No
ENSG00000096717	3800.09	0.0425233	0.0256622	1.65704	0.097512	0.653202	SIRT1	No	No	No
ENSG00000154124	1481.28	0.0688697	0.0415638	1.65696	0.0975271	0.653202	OTULIN	No	No	No
ENSG00000006451	3894.12	0.0614003	0.037059	1.65683	0.0975546	0.653202	RALA	No	No	No
ENSG00000056558	2036.78	-0.127755	0.0771991	-1.65488	0.0979491	0.653202	TRAF1	No	No	No
ENSG00000108465	1681.11	-0.085703	0.0518292	-1.65357	0.0982158	0.653202	CDK5RAP3	No	No	No
ENSG00000167671	3556.83	-0.0635553	0.0384395	-1.65339	0.0982524	0.653202	UBXN6	No	No	No
ENSG00000122299	3574.64	0.0729474	0.044134	1.65286	0.0983589	0.653202	ZC3H7A	No	No	No
ENSG00000144560	1502.33	-0.0989527	0.0598746	-1.65266	0.0983991	0.653202	VGLL4	No	No	No
ENSG00000005810	8671.18	0.0699992	0.0423625	1.65239	0.0984558	0.653202	MYCBP2	No	No	No
ENSG00000085117	4574.37	-0.10643	0.0644306	-1.65185	0.0985649	0.653202	CD82	No	No	No
ENSG00000105063	11079.2	-0.0510435	0.0309406	-1.64972	0.0989994	0.653202	PPP6R1	No	No	No
ENSG00000121749	3645.78	0.0503455	0.0305181	1.64969	0.0990057	0.653202	TBC1D15	No	No	No
ENSG00000164329	3120.32	0.0436872	0.0264858	1.64946	0.099054	0.653202	PAPD4	No	No	No
ENSG00000089280	13695.8	-0.0910206	0.0552503	-1.64742	0.0994713	0.653202	FUS	No	No	No
ENSG00000014641	5108.53	-0.0461541	0.0280275	-1.64674	0.0996111	0.653202	MDH1	No	No	No
ENSG00000211714	1601.25	0.154265	0.0936892	1.64656	0.0996491	0.653202	TRBV7-3	No	No	No
ENSG00000005302	4345.57	0.0715236	0.0434473	1.64622	0.0997195	0.653202	MSL3	No	No	No
ENSG00000090686	2729.21	-0.0454286	0.0275978	-1.6461	0.0997441	0.653202	USP48	No	No	No
ENSG00000156411	3383.1	-0.0535516	0.0325372	-1.64586	0.099793	0.653202	C14orf2	No	No	No
ENSG00000149541	2216.52	-0.0688473	0.0418355	-1.64567	0.0998325	0.653202	B3GAT3	No	No	No
ENSG00000268861	1661.42	-0.196844	0.119636	-1.64535	0.0998978	0.653202	AC008878.3	No	No	No
ENSG00000139737	1886.69	0.0606094	0.0368398	1.64522	0.0999253	0.653202	SLAIN1	No	No	No
ENSG00000111669	11068.9	-0.0538299	0.0327343	-1.64445	0.100084	0.653202	TPI1	No	No	No
ENSG00000145220	2011.44	-0.0970876	0.0590467	-1.64425	0.100125	0.653202	LYAR	No	No	No
ENSG00000215030	1662.11	-1.0779	0.655561	-1.64424	0.100126	0.653202	AC073621.1	No	No	No
ENSG00000109390	1452.68	-0.0587157	0.0357421	-1.64276	0.100433	0.653202	NDUFC1	No	No	No
ENSG00000070367	3512.24	0.046759	0.0284824	1.64168	0.100656	0.653202	EXOC5	No	No	No
ENSG00000127334	9111.31	0.0590209	0.0359572	1.64142	0.10071	0.653202	DYRK2	No	No	No
ENSG00000170248	6352.77	0.0550135	0.0335187	1.64128	0.10074	0.653202	PDCD6IP	No	No	No
ENSG00000160991	2226.82	-0.0951505	0.0580161	-1.64007	0.100991	0.653202	ORAI2	No	No	No
ENSG00000132254	1493.18	0.0525283	0.0320465	1.63913	0.101186	0.653202	ARFIP2	No	No	No
ENSG00000151690	2171.18	-0.0764432	0.046673	-1.63785	0.101453	0.653202	MFSD6	No	No	No
ENSG00000113522	2152.9	0.0609349	0.0372056	1.63779	0.101466	0.653202	RAD50	No	No	No
ENSG00000133639	45303	0.093206	0.0569207	1.63747	0.101532	0.653202	BTG1	No	No	No
ENSG00000167077	1522.86	0.0852022	0.052038	1.63731	0.101566	0.653202	MEI1	No	No	No
ENSG00000170873	2192.5	-0.226533	0.138381	-1.63702	0.101626	0.653202	MTSS1	No	No	No
ENSG00000142227	9761.65	-0.0579512	0.0354069	-1.63672	0.101689	0.653202	EMP3	No	No	No
ENSG00000280433	1672.18	-0.155134	0.0947884	-1.63663	0.101707	0.653202	FP565260.7	No	No	No
ENSG00000171206	2627.19	-0.0567296	0.0346626	-1.63662	0.10171	0.653202	TRIM8	No	No	No
ENSG00000105699	2261.76	-0.141405	0.0864143	-1.63636	0.101764	0.653202	LSR	No	No	No
ENSG00000182004	3721.2	-0.0731421	0.0446994	-1.63631	0.101775	0.653202	SNRPE	No	No	No
ENSG00000109736	1750.09	-0.0920628	0.0563389	-1.63409	0.10224	0.655427	MFSD10	No	No	No
ENSG00000085377	2126.17	-0.04266	0.0261204	-1.6332	0.102426	0.655861	PREP	No	No	No
ENSG00000135677	3967.84	0.0784842	0.0481262	1.6308	0.102933	0.658341	GNS	No	No	No
ENSG00000213930	1403.52	-0.0950521	0.0583591	-1.62875	0.103367	0.659566	GALT	No	No	No
ENSG00000225553	4355.92	-0.195354	0.119967	-1.62839	0.103442	0.659566	PHF1	No	No	No
ENSG00000148218	2456.21	-0.0691668	0.0424879	-1.62792	0.103542	0.659566	ALAD	No	No	No
ENSG00000133641	1368.4	0.0662	0.0406946	1.62675	0.10379	0.659566	C12orf29	No	No	No
ENSG00000160208	4530.41	0.0424652	0.0261181	1.62589	0.103973	0.659566	RRP1B	No	No	No
ENSG00000146083	6422.64	-0.0782465	0.0481279	-1.6258	0.103992	0.659566	RNF44	No	No	No
ENSG00000103342	6362.75	0.0435652	0.0268083	1.62506	0.104149	0.659566	GSPT1	No	No	No
ENSG00000163344	1853.42	-0.0523314	0.0322114	-1.62462	0.104243	0.659566	PMVK	No	No	No
ENSG00000129515	6980.71	0.0427167	0.0262959	1.62446	0.104277	0.659566	SNX6	No	No	No
ENSG00000128731	1712.66	0.0929374	0.0572531	1.62327	0.104531	0.659566	HERC2	No	No	No
ENSG00000153250	6611.1	0.0932554	0.057453	1.62316	0.104555	0.659566	RBMS1	No	No	No
ENSG00000122026	138412	0.0902962	0.0556301	1.62315	0.104557	0.659566	RPL21	No	No	No
ENSG00000028277	1655.19	-0.102343	0.0631538	-1.62054	0.105116	0.66234	POU2F2	No	No	No
ENSG00000244045	1535.06	0.0471263	0.0291274	1.61793	0.105677	0.662813	TMEM199	No	No	No
ENSG00000110048	2908.44	0.0544152	0.0336358	1.61777	0.105711	0.662813	OSBP	No	No	No
ENSG00000124209	2052.16	0.051624	0.0319645	1.61504	0.106302	0.662813	RAB22A	No	No	No
ENSG00000120942	2854.96	0.058747	0.0363833	1.61467	0.106382	0.662813	UBIAD1	No	No	No
ENSG00000130165	2188.47	-0.0564609	0.0349698	-1.61456	0.106406	0.662813	ELOF1	No	No	No
ENSG00000132017	1461.29	-0.0731259	0.0452957	-1.61441	0.106438	0.662813	DCAF15	No	No	No
ENSG00000103363	4254.09	-0.0557628	0.0345413	-1.61438	0.106445	0.662813	ELOB	No	No	No
ENSG00000147168	35133.4	-0.0512512	0.0317642	-1.61349	0.106639	0.662813	IL2RG	No	No	No
ENSG00000227097	16853.8	-0.170875	0.105909	-1.61341	0.106656	0.662813	RPS28P7	No	No	No
ENSG00000171843	2978.74	0.0805671	0.0499481	1.61302	0.106741	0.662813	MLLT3	No	No	No
ENSG00000100028	4317.95	-0.0375871	0.0233051	-1.61283	0.106782	0.662813	SNRPD3	No	No	No
ENSG00000131018	8183.86	0.0596745	0.0370079	1.61248	0.106857	0.662813	SYNE1	No	No	No
ENSG00000183049	2458.87	0.064938	0.0402751	1.61236	0.106883	0.662813	CAMK1D	No	No	No
ENSG00000119446	2035.39	0.040074	0.0248642	1.61171	0.107024	0.662813	RBM18	No	No	No
ENSG00000142166	3744.47	0.0557338	0.034594	1.61108	0.107162	0.662813	IFNAR1	No	No	No
ENSG00000149499	3185.58	-0.0758737	0.0471184	-1.61028	0.107337	0.662813	EML3	No	No	No
ENSG00000139725	6118.12	-0.0537871	0.0334156	-1.60964	0.107477	0.662813	RHOF	No	No	No
ENSG00000025796	4247.25	0.0450269	0.0279868	1.60887	0.107646	0.662813	SEC63	No	No	No
ENSG00000048405	2334.48	0.0648665	0.0403289	1.60844	0.10774	0.662813	ZNF800	No	No	No
ENSG00000119414	6775.1	0.0389896	0.0242453	1.60813	0.107806	0.662813	PPP6C	No	No	No
ENSG00000164463	3025.88	0.0859406	0.053457	1.60766	0.10791	0.662813	CREBRF	No	No	No
ENSG00000143033	2206.61	0.0445018	0.0277057	1.60623	0.108223	0.662813	MTF2	No	No	No
ENSG00000118181	78940.8	-0.0466384	0.0290528	-1.6053	0.108429	0.662813	RPS25	No	No	No
ENSG00000280831	78940.8	-0.0466384	0.0290528	-1.6053	0.108429	0.662813	RPS25	No	No	No
ENSG00000197694	16369.2	0.0604921	0.0376856	1.60518	0.108454	0.662813	SPTAN1	No	No	No
ENSG00000165272	13723	-0.0827137	0.0515628	-1.60413	0.108684	0.662813	AQP3	No	No	No
ENSG00000115866	5347.09	0.0646382	0.0403075	1.60363	0.108796	0.662813	DARS	No	No	No
ENSG00000273673	133972	0.522542	0.325989	1.60294	0.108947	0.662813	RPL9P9	No	No	No
ENSG00000172673	2960.92	0.0788327	0.0491838	1.60282	0.108975	0.662813	THEMIS	No	No	No
ENSG00000164091	22015.2	0.056589	0.0353171	1.60231	0.109087	0.662813	WDR82	No	No	No
ENSG00000158435	3205.55	-0.0506169	0.031595	-1.60205	0.109144	0.662813	CNOT11	No	No	No
ENSG00000135905	7933.82	0.0822703	0.0513831	1.60112	0.109351	0.662813	DOCK10	No	No	No
ENSG00000116171	5090.24	-0.0544639	0.0340846	-1.5979	0.110065	0.662813	SCP2	No	No	No
ENSG00000184575	4863.61	0.0597535	0.0374195	1.59685	0.110298	0.662813	XPOT	No	No	No
ENSG00000159079	1798	-0.0592852	0.0371313	-1.59664	0.110346	0.662813	C21orf59	No	No	No
ENSG00000156171	2410.46	0.087524	0.054821	1.59654	0.110368	0.662813	DRAM2	No	No	No
ENSG00000173812	29646.6	-0.0496382	0.0310977	-1.5962	0.110444	0.662813	EIF1	No	No	No
ENSG00000123575	3183.07	0.0509862	0.0319581	1.59541	0.110621	0.662813	FAM199X	No	No	No
ENSG00000119314	11530.4	0.0641252	0.0402124	1.59466	0.110787	0.662813	PTBP3	No	No	No
ENSG00000164649	1607.71	0.155695	0.0976424	1.59454	0.110815	0.662813	CDCA7L	No	No	No
ENSG00000149231	1833.64	0.0541831	0.0339818	1.59447	0.11083	0.662813	CCDC82	No	No	No
ENSG00000167664	1903.4	0.113046	0.0709455	1.59342	0.111066	0.662813	TMIGD2	No	No	No
ENSG00000136807	2101.01	-0.0428123	0.0268726	-1.59316	0.111124	0.662813	CDK9	No	No	No
ENSG00000186111	1541.39	-0.0757667	0.0475978	-1.59181	0.111427	0.662813	PIP5K1C	No	No	No
ENSG00000204138	1418.83	-0.0925782	0.058176	-1.59135	0.111532	0.662813	PHACTR4	No	No	No
ENSG00000135316	10727.7	0.0425419	0.0267405	1.59092	0.111628	0.662813	SYNCRIP	No	No	No
ENSG00000121104	5420.17	-0.0572806	0.0360208	-1.59021	0.111787	0.662813	FAM117A	No	No	No
ENSG00000015285	8017.79	-0.0605037	0.0380571	-1.58981	0.111877	0.662813	WAS	No	No	No
ENSG00000033800	4713.16	0.0514716	0.0323828	1.58947	0.111954	0.662813	PIAS1	No	No	No
ENSG00000139645	1695.78	-0.0605882	0.038123	-1.58928	0.111997	0.662813	ANKRD52	No	No	No
ENSG00000119638	6204.49	0.0492432	0.0310234	1.58729	0.112446	0.662813	NEK9	No	No	No
ENSG00000100105	3215.04	0.053074	0.0334397	1.58716	0.112477	0.662813	PATZ1	No	No	No
ENSG00000257093	2321.2	0.0836375	0.0526984	1.5871	0.11249	0.662813	KIAA1147	No	No	No
ENSG00000262599	2321.2	0.0836375	0.0526984	1.5871	0.11249	0.662813	KIAA1147	No	No	No
ENSG00000174106	2476.89	0.0692473	0.0436346	1.58698	0.112517	0.662813	LEMD3	No	No	No
ENSG00000166501	8822.96	-0.11663	0.0735026	-1.58675	0.112569	0.662813	PRKCB	No	No	No
ENSG00000138821	2761.85	-0.0734858	0.0463139	-1.58669	0.112583	0.662813	SLC39A8	No	No	No
ENSG00000124151	4425.26	0.062105	0.0391471	1.58645	0.112637	0.662813	NCOA3	No	No	No
ENSG00000181350	11009.9	0.0706058	0.0445122	1.58621	0.112691	0.662813	LRRC75A	No	No	No
ENSG00000070610	1420.08	-0.0724822	0.0457011	-1.586	0.112738	0.662813	GBA2	No	No	No
ENSG00000182979	1913.73	-0.0605612	0.0381875	-1.58589	0.112764	0.662813	MTA1	No	No	No
ENSG00000165943	1665.36	0.0503346	0.0317396	1.58586	0.112771	0.662813	MOAP1	No	No	No
ENSG00000278268	1665.36	0.0503346	0.0317396	1.58586	0.112771	0.662813	MOAP1	No	No	No
ENSG00000274803	1602.55	0.234211	0.147736	1.58533	0.112891	0.662813	BDP1	No	No	No
ENSG00000089916	1728.05	0.0518408	0.0327158	1.58458	0.113061	0.662813	GPATCH2L	No	No	No
ENSG00000129255	1374.78	-0.064637	0.0408171	-1.58358	0.11329	0.662813	MPDU1	No	No	No
ENSG00000023287	3056.45	0.053839	0.0340048	1.58328	0.113358	0.662813	RB1CC1	No	No	No
ENSG00000130803	2100.42	0.045734	0.0288907	1.583	0.113422	0.662813	ZNF317	No	No	No
ENSG00000134371	2753.86	0.0491137	0.0310297	1.5828	0.113467	0.662813	CDC73	No	No	No
ENSG00000152332	11922.3	0.0567985	0.0359058	1.58187	0.113678	0.663342	UHMK1	No	No	No
ENSG00000100796	7682.03	0.0472324	0.0298752	1.58099	0.113879	0.663405	PPP4R3A	No	No	No
ENSG00000162869	1858.81	0.0503471	0.0318509	1.58071	0.113944	0.663405	PPP1R21	No	No	No
ENSG00000140262	3342.42	0.0535348	0.0338774	1.58025	0.114049	0.663405	TCF12	No	No	No
ENSG00000133773	1829.01	0.0401881	0.0254573	1.57865	0.114416	0.663459	CCDC59	No	No	No
ENSG00000123416	16939.3	-0.0888847	0.0563235	-1.57811	0.114541	0.663459	TUBA1B	No	No	No
ENSG00000174917	1972.7	-0.0623853	0.0395373	-1.57789	0.114592	0.663459	C19orf70	No	No	No
ENSG00000196262	43816.2	-0.0440705	0.027932	-1.57777	0.114617	0.663459	PPIA	No	No	No
ENSG00000169093	1795.57	-0.0630938	0.0399936	-1.5776	0.114659	0.663459	ASMTL	No	No	No
ENSG00000140577	7065.86	0.0721479	0.0457878	1.5757	0.115094	0.664131	CRTC3	No	No	No
ENSG00000166855	2169.46	0.0473639	0.0300827	1.57446	0.115381	0.664131	CLPX	No	No	No
ENSG00000125630	1669.28	0.0732683	0.0465417	1.57425	0.11543	0.664131	POLR1B	No	No	No
ENSG00000162511	74682.7	0.0520683	0.0330813	1.57395	0.115499	0.664131	LAPTM5	No	No	No
ENSG00000156697	1421.23	0.050903	0.0323906	1.57153	0.116059	0.664131	UTP14A	No	No	No
ENSG00000175470	2373.43	0.0451041	0.0287038	1.57136	0.116098	0.664131	PPP2R2D	No	No	No
ENSG00000123104	2374.83	0.0666243	0.0423998	1.57133	0.116105	0.664131	ITPR2	No	No	No
ENSG00000067057	2859.61	-0.141747	0.0902814	-1.57006	0.116402	0.664131	PFKP	No	No	No
ENSG00000162852	4146.58	0.0719006	0.0458211	1.56916	0.116611	0.664131	CNST	No	No	No
ENSG00000139437	1550.18	-0.0621334	0.0396002	-1.56902	0.116644	0.664131	TCHP	No	No	No
ENSG00000126524	3093.46	-0.0455206	0.0290235	-1.56841	0.116786	0.664131	SBDS	No	No	No
ENSG00000173597	2496.09	0.121875	0.077707	1.5684	0.116788	0.664131	SULT1B1	No	No	No
ENSG00000141582	2556.04	-0.0608194	0.0387804	-1.5683	0.116811	0.664131	CBX4	No	No	No
ENSG00000165168	2653.17	0.178137	0.113605	1.56805	0.116871	0.664131	CYBB	No	No	No
ENSG00000162613	5292.52	0.0570141	0.0363679	1.5677	0.11695	0.664131	FUBP1	No	No	No
ENSG00000139687	2265.81	0.0590121	0.0376499	1.56739	0.117023	0.664131	RB1	No	No	No
ENSG00000115464	7112.05	0.0614481	0.0392086	1.56721	0.117066	0.664131	USP34	No	No	No
ENSG00000197136	1962.19	-0.073456	0.0468821	-1.56682	0.117156	0.664131	PCNX3	No	No	No
ENSG00000100380	12002.2	0.0702463	0.044838	1.56667	0.117192	0.664131	ST13	No	No	No
ENSG00000173660	7559.29	-0.0660063	0.0421509	-1.56595	0.11736	0.664131	UQCRH	No	No	No
ENSG00000065518	3048.69	-0.0464729	0.0296803	-1.56578	0.1174	0.664131	NDUFB4	No	No	No
ENSG00000089234	1467.02	0.0387474	0.0247666	1.5645	0.117699	0.664131	BRAP	No	No	No
ENSG00000174197	2845.9	0.0602647	0.0385224	1.5644	0.117723	0.664131	MGA	No	No	No
ENSG00000079432	4093.7	-0.0744987	0.04763	-1.56411	0.117791	0.664131	CIC	No	No	No
ENSG00000129071	1747.26	-0.0508499	0.032515	-1.56389	0.117843	0.664131	MBD4	No	No	No
ENSG00000129003	5304.33	0.0815885	0.0521868	1.56339	0.11796	0.664131	VPS13C	No	No	No
ENSG00000105887	12438	-0.0556079	0.0355815	-1.56283	0.118092	0.664131	MTPN	No	No	No
ENSG00000154174	3915.76	0.0443043	0.0283524	1.56263	0.11814	0.664131	TOMM70	No	No	No
ENSG00000186298	11867.4	0.0539192	0.0345264	1.56168	0.118363	0.664197	PPP1CC	No	No	No
ENSG00000121766	1868.68	-0.0475915	0.0304769	-1.56156	0.118392	0.664197	ZCCHC17	No	No	No
ENSG00000198960	1460.49	-0.0471708	0.0302331	-1.56024	0.118704	0.664405	ARMCX6	No	No	No
ENSG00000185344	1454.14	0.0843644	0.0540884	1.55975	0.118819	0.664405	ATP6V0A2	No	No	No
ENSG00000068394	1739.96	-0.0507374	0.0325363	-1.55941	0.1189	0.664405	GPKOW	No	No	No
ENSG00000077684	3395.94	0.0567029	0.0363628	1.55937	0.11891	0.664405	JADE1	No	No	No
ENSG00000034510	106657	0.0544294	0.0349249	1.55847	0.119122	0.664918	TMSB10	No	No	No
ENSG00000126067	2814.72	-0.0463925	0.0297883	-1.55741	0.119374	0.664987	PSMB2	No	No	No
ENSG00000173114	4936.37	0.323318	0.207601	1.5574	0.119375	0.664987	LRRN3	No	No	No
ENSG00000155307	2622.94	-0.0744677	0.0479246	-1.55385	0.120219	0.667514	SAMSN1	No	No	No
ENSG00000214113	1973.41	0.107305	0.0690956	1.553	0.120424	0.667514	LYRM4	No	No	No
ENSG00000241468	4024.48	-0.0611631	0.0393841	-1.55299	0.120425	0.667514	ATP5J2	No	No	No
ENSG00000217555	1554.53	-0.0669363	0.0431024	-1.55296	0.120433	0.667514	CKLF	No	No	No
ENSG00000013306	3225.96	-0.0652016	0.0419993	-1.55245	0.120556	0.667514	SLC25A39	No	No	No
ENSG00000144028	12612.1	0.0622348	0.0401103	1.55159	0.12076	0.667514	SNRNP200	No	No	No
ENSG00000061936	1912.34	-0.0678483	0.0437375	-1.55126	0.120839	0.667514	SFSWAP	No	No	No
ENSG00000179912	3172.31	-0.0798764	0.051492	-1.55124	0.120844	0.667514	R3HDM2	No	No	No
ENSG00000183726	8157.04	-0.0496533	0.0320234	-1.55053	0.121014	0.667514	TMEM50A	No	No	No
ENSG00000196961	2526.71	-0.0654174	0.0421929	-1.55044	0.121037	0.667514	AP2A1	No	No	No
ENSG00000175768	2291.47	-0.0436819	0.028198	-1.54911	0.121354	0.668006	TOMM5	No	No	No
ENSG00000099204	21950.7	0.0696927	0.0449904	1.54906	0.121368	0.668006	ABLIM1	No	No	No
ENSG00000112695	4926.47	-0.0519675	0.0335726	-1.54792	0.121642	0.668851	COX7A2	No	No	No
ENSG00000153914	1837.41	0.0590155	0.0381709	1.54609	0.122084	0.669261	SREK1	No	No	No
ENSG00000116005	2647.18	0.0657419	0.0425496	1.54507	0.12233	0.669261	PCYOX1	No	No	No
ENSG00000120910	2999.99	0.0678701	0.0439381	1.54468	0.122425	0.669261	PPP3CC	No	No	No
ENSG00000163960	2440.38	0.0606928	0.0393056	1.54413	0.122558	0.669261	UBXN7	No	No	No
ENSG00000127054	2823.98	-0.04299	0.0278457	-1.54387	0.122621	0.669261	INTS11	No	No	No
ENSG00000180628	8536.61	0.0630501	0.0408409	1.5438	0.122638	0.669261	PCGF5	No	No	No
ENSG00000227507	6396.9	-0.0745232	0.0482818	-1.5435	0.122709	0.669261	LTB	No	No	No
ENSG00000101911	2230.51	0.0678608	0.0439896	1.54265	0.122915	0.669261	PRPS2	No	No	No
ENSG00000132824	7397.36	0.0546001	0.0354165	1.54166	0.123157	0.669261	SERINC3	No	No	No
ENSG00000176407	2669.45	-0.0432414	0.028049	-1.54163	0.123163	0.669261	KCMF1	No	No	No
ENSG00000112339	2051.64	0.0537818	0.0349001	1.54102	0.123312	0.669261	HBS1L	No	No	No
ENSG00000173473	7829.29	0.0428765	0.0278245	1.54096	0.123327	0.669261	SMARCC1	No	No	No
ENSG00000051523	13489.1	-0.0689328	0.0447436	-1.54062	0.12341	0.669261	CYBA	No	No	No
ENSG00000143799	10842.5	-0.0552977	0.0358981	-1.54041	0.123461	0.669261	PARP1	No	No	No
ENSG00000034152	2820.55	-0.0665644	0.0432206	-1.54011	0.123534	0.669261	MAP2K3	No	No	No
ENSG00000106052	7714.68	0.046799	0.030406	1.53914	0.12377	0.669826	TAX1BP1	No	No	No
ENSG00000172292	2272.19	0.100962	0.0656154	1.53869	0.12388	0.669826	CERS6	No	No	No
ENSG00000172831	1929.28	-0.0541662	0.0352316	-1.53743	0.124187	0.669902	CES2	No	No	No
ENSG00000146247	2969.01	0.0750816	0.0488586	1.53671	0.124364	0.669902	PHIP	No	No	No
ENSG00000241978	1894.53	0.164073	0.106788	1.53643	0.124432	0.669902	AKAP2	No	No	No
ENSG00000101361	5158.67	0.0436614	0.0284216	1.5362	0.124488	0.669902	NOP56	No	No	No
ENSG00000009307	37174.7	0.0431775	0.0281075	1.53615	0.1245	0.669902	CSDE1	No	No	No
ENSG00000188229	2262.35	-0.10491	0.0683208	-1.53555	0.124649	0.670048	TUBB4B	No	No	No
ENSG00000138246	2849.81	0.0540451	0.0352325	1.53395	0.125041	0.671224	DNAJC13	No	No	No
ENSG00000114744	1849.3	0.0522535	0.0340709	1.53367	0.125111	0.671224	COMMD2	No	No	No
ENSG00000244509	3617.25	-0.114491	0.0747304	-1.53206	0.125508	0.672704	APOBEC3C	No	No	No
ENSG00000140320	2958.23	-0.060751	0.0396914	-1.53058	0.125872	0.674003	BAHD1	No	No	No
ENSG00000114316	4169.86	-0.0321756	0.0210574	-1.52799	0.126514	0.676782	USP4	No	No	No
ENSG00000069974	3950.03	-0.0736597	0.0482402	-1.52694	0.126777	0.677122	RAB27A	No	No	No
ENSG00000162191	10082.9	0.0539485	0.0353413	1.5265	0.126885	0.677122	UBXN1	No	No	No
ENSG00000106723	2576.19	0.0508643	0.0333261	1.52626	0.126945	0.677122	SPIN1	No	No	No
ENSG00000151353	1847.36	0.0670507	0.0439484	1.52567	0.127092	0.677252	TMEM18	No	No	No
ENSG00000123472	2321.99	-0.0418829	0.0274648	-1.52496	0.127268	0.677537	ATPAF1	No	No	No
ENSG00000167220	2092.38	0.0529461	0.0347316	1.52444	0.1274	0.677586	HDHD2	No	No	No
ENSG00000114353	29049.8	-0.0423676	0.0278132	-1.52329	0.127686	0.678454	GNAI2	No	No	No
ENSG00000149357	4796.87	-0.05935	0.0389936	-1.52205	0.127998	0.679457	LAMTOR1	No	No	No
ENSG00000089060	3064.53	0.0805603	0.0530024	1.51994	0.128527	0.681061	SLC8B1	No	No	No
ENSG00000196544	1459.47	-0.0712171	0.0468577	-1.51986	0.128546	0.681061	BORCS6	No	No	No
ENSG00000164346	13725.7	0.102224	0.0674176	1.51628	0.129449	0.685186	NSA2	No	No	No
ENSG00000198791	7888.73	0.046655	0.0307883	1.51535	0.129684	0.685774	CNOT7	No	No	No
ENSG00000143851	4287.23	-0.0692528	0.0457851	-1.51256	0.130391	0.68773	PTPN7	No	No	No
ENSG00000267216	2003.95	-0.0521626	0.0344968	-1.5121	0.130509	0.68773	AC020915.2	No	No	No
ENSG00000172086	2999.49	0.0637321	0.0421541	1.51188	0.130564	0.68773	KRCC1	No	No	No
ENSG00000149823	12191.1	0.055641	0.0368059	1.51174	0.1306	0.68773	VPS51	No	No	No
ENSG00000125844	1621.96	-0.0851173	0.0563455	-1.51063	0.130882	0.68773	RRBP1	No	No	No
ENSG00000104870	2473.3	0.107979	0.071501	1.51018	0.130997	0.68773	FCGRT	No	No	No
ENSG00000120709	1927.79	0.059996	0.0397304	1.51008	0.131023	0.68773	FAM53C	No	No	No
ENSG00000123106	2292.04	0.0525904	0.0348286	1.50998	0.131049	0.68773	CCDC91	No	No	No
ENSG00000172932	2234.22	-0.128132	0.0848917	-1.50936	0.131208	0.687845	ANKRD13D	No	No	No
ENSG00000178607	3481.25	-0.170388	0.112921	-1.50892	0.13132	0.687845	ERN1	No	No	No
ENSG00000140943	5661.81	0.0505172	0.0335182	1.50716	0.131771	0.689551	MBTPS1	No	No	No
ENSG00000081237	92997.8	0.0492225	0.0327164	1.50452	0.132447	0.691772	PTPRC	No	No	No
ENSG00000120437	1560.93	0.0812666	0.0540528	1.50347	0.132719	0.691772	ACAT2	No	No	No
ENSG00000167716	1811.26	-0.158858	0.105661	-1.50346	0.13272	0.691772	WDR81	No	No	No
ENSG00000166925	7721.92	-0.0614434	0.0408768	-1.50314	0.132804	0.691772	TSC22D4	No	No	No
ENSG00000102172	2216.68	0.0551386	0.036684	1.50307	0.132821	0.691772	SMS	No	No	No
ENSG00000135870	2354.94	0.0610221	0.0406303	1.50189	0.133126	0.692407	RC3H1	No	No	No
ENSG00000136536	7389.54	0.0809507	0.0539403	1.50075	0.133421	0.692407	MARCH7	No	No	No
ENSG00000112159	3189.3	0.0907266	0.0604662	1.50045	0.133498	0.692407	MDN1	No	No	No
ENSG00000240972	3696.27	-0.0531872	0.0354541	-1.50017	0.13357	0.692407	MIF	No	No	No
ENSG00000276701	3696.27	-0.0531872	0.0354541	-1.50017	0.13357	0.692407	MIF	No	No	No
ENSG00000124356	1438.6	-0.0466253	0.0311045	-1.49899	0.133876	0.692622	STAMBP	No	No	No
ENSG00000147905	1945.54	0.0508103	0.0338999	1.49883	0.133917	0.692622	ZCCHC7	No	No	No
ENSG00000062725	1958.18	0.0557446	0.0372022	1.49842	0.134024	0.692622	APPBP2	No	No	No
ENSG00000117280	4455.18	-0.0554848	0.0370461	-1.49772	0.134205	0.692622	RAB29	No	No	No
ENSG00000092847	2433.12	0.0395046	0.0263787	1.4976	0.134238	0.692622	AGO1	No	No	No
ENSG00000153207	3824.24	0.0657209	0.0439106	1.4967	0.134472	0.693183	AHCTF1	No	No	No
ENSG00000085788	2762.34	0.047729	0.0319161	1.49545	0.134797	0.693495	DDHD2	No	No	No
ENSG00000175756	2735.78	-0.0427609	0.0285995	-1.49516	0.134873	0.693495	AURKAIP1	No	No	No
ENSG00000213516	1576.54	0.0566228	0.0378743	1.49502	0.134909	0.693495	RBMXL1	No	No	No
ENSG00000122707	1763.2	0.064048	0.042876	1.4938	0.135229	0.694239	RECK	No	No	No
ENSG00000173511	1948.99	-0.083393	0.0558569	-1.49298	0.135444	0.694239	VEGFB	No	No	No
ENSG00000126261	7555.77	0.0468645	0.0313957	1.49271	0.135514	0.694239	UBA2	No	No	No
ENSG00000135776	1670.13	0.0750019	0.0502579	1.49234	0.135609	0.694239	ABCB10	No	No	No
ENSG00000155876	3022.64	-0.0586405	0.0393094	-1.49177	0.13576	0.694239	RRAGA	No	No	No
ENSG00000095574	1759.64	0.0571661	0.0383257	1.49159	0.135807	0.694239	IKZF5	No	No	No
ENSG00000198728	4075.44	-0.062312	0.0418533	-1.48882	0.136535	0.696956	LDB1	No	No	No
ENSG00000196072	2638.62	-0.0425644	0.0285939	-1.48858	0.136597	0.696956	BLOC1S2	No	No	No
ENSG00000074695	4527	0.068727	0.0461836	1.48813	0.136717	0.696956	LMAN1	No	No	No
ENSG00000134255	2087.21	0.0702986	0.0472574	1.48757	0.136865	0.697066	CEPT1	No	No	No
ENSG00000197329	1556.35	0.0770573	0.0518582	1.48592	0.137299	0.697849	PELI1	No	No	No
ENSG00000104679	1449.35	0.0585523	0.0394483	1.48428	0.137735	0.697849	R3HCC1	No	No	No
ENSG00000131469	132242	0.0600698	0.0404875	1.48366	0.137898	0.697849	RPL27	No	No	No
ENSG00000168918	4776.7	-0.0442941	0.0298582	-1.48348	0.137947	0.697849	INPP5D	No	No	No
ENSG00000281614	4776.7	-0.0442941	0.0298582	-1.48348	0.137947	0.697849	INPP5D	No	No	No
ENSG00000094916	2944.05	0.0646433	0.0435788	1.48337	0.137977	0.697849	CBX5	No	No	No
ENSG00000086598	9103.06	0.0519288	0.0350673	1.48083	0.138651	0.697849	TMED2	No	No	No
ENSG00000163946	6736.34	0.0613048	0.0414076	1.48052	0.138734	0.697849	FAM208A	No	No	No
ENSG00000215193	1741.66	-0.0444032	0.029994	-1.48041	0.138765	0.697849	PEX26	No	No	No
ENSG00000114023	1890.2	-0.0579793	0.0391806	-1.47979	0.138928	0.697849	FAM162A	No	No	No
ENSG00000129675	11339.5	0.0601866	0.0406785	1.47957	0.138989	0.697849	ARHGEF6	No	No	No
ENSG00000101843	1986.54	-0.0517082	0.0349496	-1.47951	0.139004	0.697849	PSMD10	No	No	No
ENSG00000167118	3240.71	-0.0594039	0.040153	-1.47944	0.139024	0.697849	URM1	No	No	No
ENSG00000089775	1800.49	0.0600842	0.040613	1.47943	0.139025	0.697849	ZBTB25	No	No	No
ENSG00000068903	1879.63	-0.0585081	0.0395503	-1.47933	0.139051	0.697849	SIRT2	No	No	No
ENSG00000072864	1570.68	0.0761528	0.0514894	1.479	0.13914	0.697849	NDE1	No	No	No
ENSG00000118260	4026.71	0.0487483	0.0329662	1.47873	0.139211	0.697849	CREB1	No	No	No
ENSG00000022267	2240.07	-0.142863	0.0966311	-1.47843	0.139292	0.697849	FHL1	No	No	No
ENSG00000172795	2980.11	0.0722503	0.0488892	1.47784	0.139451	0.698015	DCP2	No	No	No
ENSG00000090266	3402.97	-0.0634353	0.0429544	-1.4768	0.139728	0.698125	NDUFB2	No	No	No
ENSG00000075303	1415.03	0.0559588	0.0379003	1.47648	0.139816	0.698125	SLC25A40	No	No	No
ENSG00000105723	3074.9	-0.0537989	0.0364634	-1.47542	0.1401	0.698125	GSK3A	No	No	No
ENSG00000138796	1551.14	-0.0482284	0.0326897	-1.47534	0.140121	0.698125	HADH	No	No	No
ENSG00000166908	1401.22	-0.0427711	0.028992	-1.47527	0.140139	0.698125	PIP4K2C	No	No	No
ENSG00000128989	6013.3	0.0710757	0.0481892	1.47493	0.140231	0.698125	ARPP19	No	No	No
ENSG00000139182	1877.74	-0.169025	0.114697	-1.47367	0.140571	0.698801	CLSTN3	No	No	No
ENSG00000151500	1900.15	-0.0362964	0.0246394	-1.4731	0.140723	0.698801	THYN1	No	No	No
ENSG00000005483	7819.93	0.0540206	0.0366839	1.4726	0.14086	0.698801	KMT2E	No	No	No
ENSG00000153922	2753.76	0.0642923	0.0436606	1.47255	0.140873	0.698801	CHD1	No	No	No
ENSG00000101695	2894.98	0.0788268	0.0535948	1.47079	0.141347	0.70027	RNF125	No	No	No
ENSG00000084072	2630.96	-0.0648388	0.0440933	-1.47049	0.141429	0.70027	PPIE	No	No	No
ENSG00000035403	4323.54	-0.143562	0.0976883	-1.4696	0.141671	0.70027	VCL	No	No	No
ENSG00000164209	3694.49	0.0521464	0.0354839	1.46958	0.141676	0.70027	SLC25A46	No	No	No
ENSG00000113391	1841.58	0.0509462	0.0346911	1.46857	0.14195	0.700999	FAM172A	No	No	No
ENSG00000111775	5789.64	-0.0472273	0.0321722	-1.46795	0.142118	0.701198	COX6A1	No	No	No
ENSG00000146535	2096.45	-0.0520453	0.0354773	-1.467	0.142376	0.701846	GNA12	No	No	No
ENSG00000090273	3762.48	-0.0489415	0.0333823	-1.46609	0.142624	0.702443	NUDC	No	No	No
ENSG00000187688	4170.39	-0.0489513	0.0334383	-1.46393	0.143214	0.704252	TRPV2	No	No	No
ENSG00000141030	3050.77	0.0334286	0.0228419	1.46348	0.143336	0.704252	COPS3	No	No	No
ENSG00000172345	2908.97	0.0953402	0.065176	1.46281	0.143519	0.704252	STARD5	No	No	No
ENSG00000131236	33823.6	0.0373064	0.0255162	1.46207	0.143723	0.704252	CAP1	No	No	No
ENSG00000126391	2343.72	0.0542885	0.0371458	1.4615	0.143879	0.704252	FRMD8	No	No	No
ENSG00000100023	2203.79	-0.0644068	0.0440801	-1.46113	0.14398	0.704252	PPIL2	No	No	No
ENSG00000113811	2244.92	-0.0579373	0.0396601	-1.46085	0.144058	0.704252	SELENOK	No	No	No
ENSG00000231631	1912.97	0.235094	0.160956	1.46061	0.144124	0.704252	PSMB8	No	No	No
ENSG00000175826	6425.83	-0.0523551	0.0358461	-1.46055	0.144138	0.704252	CTDNEP1	No	No	No
ENSG00000130429	21183.1	-0.0565731	0.0387631	-1.45946	0.144439	0.705099	ARPC1B	No	No	No
ENSG00000179134	1415.64	-0.0609345	0.0417724	-1.45873	0.14464	0.705458	SAMD4B	No	No	No
ENSG00000077458	1542	0.0590053	0.0405156	1.45636	0.145293	0.707489	FAM76B	No	No	No
ENSG00000065000	4056.2	-0.0436501	0.0299736	-1.45629	0.145313	0.707489	AP3D1	No	No	No
ENSG00000136950	2345.64	-0.0462518	0.0317764	-1.45554	0.14552	0.707727	ARPC5L	No	No	No
ENSG00000176915	3547.4	0.0413962	0.0284474	1.45519	0.145618	0.707727	ANKLE2	No	No	No
ENSG00000276016	2610.4	-0.0975411	0.067066	-1.4544	0.145834	0.708155	ABR	No	No	No
ENSG00000172890	1676.68	-0.0650233	0.0447394	-1.45338	0.146119	0.708193	NADSYN1	No	No	No
ENSG00000116747	1841.36	0.0748862	0.0515368	1.45306	0.146206	0.708193	TROVE2	No	No	No
ENSG00000067167	18845.5	0.0455369	0.0313402	1.45299	0.146227	0.708193	TRAM1	No	No	No
ENSG00000061273	5250.69	-0.062085	0.042744	-1.45248	0.146367	0.708222	HDAC7	No	No	No
ENSG00000146112	6510.66	-0.163213	0.112402	-1.45205	0.146489	0.708222	PPP1R18	No	No	No
ENSG00000104960	2066.36	-0.0678662	0.0467621	-1.45131	0.146694	0.708544	PTOV1	No	No	No
ENSG00000197324	11116	-0.042506	0.0292966	-1.45088	0.146812	0.708544	LRP10	No	No	No
ENSG00000085719	5557.99	0.0635694	0.0438724	1.44896	0.147349	0.70951	CPNE3	No	No	No
ENSG00000167553	1685	-0.0929754	0.0641816	-1.44863	0.147441	0.70951	TUBA1C	No	No	No
ENSG00000007923	1411.97	-0.0476239	0.0328768	-1.44855	0.147462	0.70951	DNAJC11	No	No	No
ENSG00000137478	2162.52	0.0524815	0.0362359	1.44833	0.147526	0.70951	FCHSD2	No	No	No
ENSG00000198932	1686.71	0.0869942	0.0601215	1.44697	0.147904	0.709714	GPRASP1	No	No	No
ENSG00000105122	7671.27	-0.0869764	0.0601151	-1.44683	0.147944	0.709714	RASAL3	No	No	No
ENSG00000189339	6107.22	-0.0843762	0.058328	-1.44658	0.148014	0.709714	SLC35E2B	No	No	No
ENSG00000136040	1671.52	-0.104383	0.0721703	-1.44634	0.148082	0.709714	PLXNC1	No	No	No
ENSG00000043093	1632.76	0.0527652	0.0365433	1.44391	0.148764	0.711089	DCUN1D1	No	No	No
ENSG00000117091	44980	0.0664448	0.0460301	1.44351	0.148878	0.711089	CD48	No	No	No
ENSG00000083312	4507.51	0.0559819	0.0387848	1.4434	0.148908	0.711089	TNPO1	No	No	No
ENSG00000080345	2379.27	0.0860304	0.059603	1.44339	0.148911	0.711089	RIF1	No	No	No
ENSG00000135049	2411.7	0.0685476	0.0475696	1.44099	0.149586	0.711089	AGTPBP1	No	No	No
ENSG00000166313	5515.86	0.0607117	0.0421324	1.44097	0.149592	0.711089	APBB1	No	No	No
ENSG00000100138	6990.28	-0.0403313	0.0280021	-1.44029	0.149785	0.711089	SNU13	No	No	No
ENSG00000142546	19825.4	0.0718741	0.0499078	1.44014	0.149828	0.711089	NOSIP	No	No	No
ENSG00000148175	5362.79	-0.119454	0.0829466	-1.44013	0.149831	0.711089	STOM	No	No	No
ENSG00000168209	3171.59	0.328327	0.228055	1.43968	0.149958	0.711089	DDIT4	No	No	No
ENSG00000142002	2237.44	-0.0512002	0.0355869	-1.43874	0.150225	0.711089	DPP9	No	No	No
ENSG00000116128	1621.87	-0.0878372	0.0610526	-1.43871	0.150231	0.711089	BCL9	No	No	No
ENSG00000136888	10169.8	0.0486893	0.0338598	1.43797	0.150443	0.711089	ATP6V1G1	No	No	No
ENSG00000169446	2358.51	0.0560934	0.039055	1.43627	0.150926	0.711089	MMGT1	No	No	No
ENSG00000205744	5396.3	-0.0646061	0.0450065	-1.43548	0.151149	0.711089	DENND1C	No	No	No
ENSG00000173674	9619.26	0.047982	0.0334264	1.43545	0.151159	0.711089	EIF1AX	No	No	No
ENSG00000101966	2179.51	0.0690114	0.0481392	1.43358	0.151692	0.711089	XIAP	No	No	No
ENSG00000168395	1401.74	0.0461085	0.0321636	1.43356	0.151697	0.711089	ING5	No	No	No
ENSG00000112992	4239.96	0.05057	0.0352775	1.43349	0.151718	0.711089	NNT	No	No	No
ENSG00000182827	2135.74	0.0466983	0.0325922	1.43281	0.151913	0.711089	ACBD3	No	No	No
ENSG00000171490	13932.6	0.0561738	0.039207	1.43275	0.151929	0.711089	RSL1D1	No	No	No
ENSG00000140299	6460.52	0.0404627	0.0282418	1.43272	0.151936	0.711089	BNIP2	No	No	No
ENSG00000151923	3848.07	0.0471993	0.0329783	1.43122	0.152366	0.711089	TIAL1	No	No	No
ENSG00000160752	2936.95	-0.0470354	0.0328783	-1.43059	0.152547	0.711089	FDPS	No	No	No
ENSG00000197442	1608.79	-0.10807	0.0755526	-1.4304	0.152602	0.711089	MAP3K5	No	No	No
ENSG00000163348	4448.96	-0.052587	0.0367645	-1.43038	0.152609	0.711089	PYGO2	No	No	No
ENSG00000116685	3068.82	-0.0394541	0.0275921	-1.42991	0.152743	0.711089	KIAA2013	No	No	No
ENSG00000134996	4781.11	-0.062164	0.0434892	-1.42941	0.152886	0.711089	OSTF1	No	No	No
ENSG00000123146	15276	0.0695773	0.0486961	1.42881	0.15306	0.711089	ADGRE5	No	No	No
ENSG00000122692	4223.27	0.0537379	0.0376192	1.42847	0.153157	0.711089	SMU1	No	No	No
ENSG00000058453	1407.25	-0.0883672	0.0618644	-1.4284	0.153176	0.711089	CROCC	No	No	No
ENSG00000148229	5240.78	0.0448073	0.0313701	1.42834	0.153193	0.711089	POLE3	No	No	No
ENSG00000130770	3706.61	-0.0464744	0.0325481	-1.42787	0.153329	0.711089	ATPIF1	No	No	No
ENSG00000089006	2970.15	-0.0453776	0.0317921	-1.42732	0.153487	0.711089	SNX5	No	No	No
ENSG00000084093	3458.65	0.0751027	0.0526186	1.4273	0.153493	0.711089	REST	No	No	No
ENSG00000111913	32613.7	0.0597796	0.0418902	1.42705	0.153565	0.711089	RIPOR2	No	No	No
ENSG00000106348	2097.14	-0.074098	0.0519405	-1.42659	0.153697	0.711089	IMPDH1	No	No	No
ENSG00000147010	11661	0.0414249	0.0290414	1.42641	0.153751	0.711089	SH3KBP1	No	No	No
ENSG00000083896	4034.7	0.0361169	0.0253289	1.42592	0.153893	0.711089	YTHDC1	No	No	No
ENSG00000275272	4034.7	0.0361169	0.0253289	1.42592	0.153893	0.711089	YTHDC1	No	No	No
ENSG00000106560	12318.7	0.0763565	0.0535633	1.42554	0.154002	0.711089	GIMAP2	No	No	No
ENSG00000152242	1555.13	0.0908174	0.06371	1.42548	0.154018	0.711089	C18orf25	No	No	No
ENSG00000165156	1511.89	0.0524625	0.0368092	1.42526	0.154083	0.711089	ZHX1	No	No	No
ENSG00000132182	14282	-0.0477088	0.0334773	-1.42511	0.154126	0.711089	NUP210	No	No	No
ENSG00000197381	1890.06	-0.0794283	0.0557394	-1.42499	0.154159	0.711089	ADARB1	No	No	No
ENSG00000008083	1568.25	-0.0676695	0.0475252	-1.42387	0.154485	0.711698	JARID2	No	No	No
ENSG00000085224	4975.61	0.0754117	0.0529708	1.42365	0.154549	0.711698	ATRX	No	No	No
ENSG00000262919	1485.77	0.0462344	0.0325081	1.42224	0.154956	0.712484	FAM58A	No	No	No
ENSG00000142347	5372.85	-0.0681931	0.0479598	-1.42188	0.155061	0.712484	MYO1F	No	No	No
ENSG00000105402	4290.18	-0.0468454	0.0329497	-1.42172	0.155106	0.712484	NAPA	No	No	No
ENSG00000214114	1576.95	-0.0426883	0.0300525	-1.42046	0.155474	0.712927	MYCBP	No	No	No
ENSG00000006831	2149.57	-0.0549547	0.0386963	-1.42015	0.155563	0.712927	ADIPOR2	No	No	No
ENSG00000147548	8434.9	0.0546178	0.0384616	1.42006	0.15559	0.712927	NSD3	No	No	No
ENSG00000177600	147267	-0.0634924	0.0447536	-1.41871	0.155984	0.71334	RPLP2	No	No	No
ENSG00000117676	4499.05	0.050178	0.0353759	1.41842	0.156067	0.71334	RPS6KA1	No	No	No
ENSG00000281877	4499.05	0.050178	0.0353759	1.41842	0.156067	0.71334	RPS6KA1	No	No	No
ENSG00000180644	5141.84	-0.243988	0.172186	-1.417	0.156481	0.713873	PRF1	No	No	No
ENSG00000090382	27856.9	0.184502	0.130423	1.41465	0.157172	0.713873	LYZ	No	No	No
ENSG00000005175	2655.77	0.0612357	0.0432957	1.41436	0.157257	0.713873	RPAP3	No	No	No
ENSG00000165929	12089.8	0.0651784	0.0460921	1.41409	0.157336	0.713873	TC2N	No	No	No
ENSG00000122068	5862.93	0.0439748	0.0311042	1.41379	0.157424	0.713873	FYTTD1	No	No	No
ENSG00000120656	1546.51	-0.0356093	0.0251897	-1.41365	0.157466	0.713873	TAF12	No	No	No
ENSG00000090581	2026.93	-0.0406962	0.02879	-1.41355	0.157494	0.713873	GNPTG	No	No	No
ENSG00000164916	2066.96	0.0796284	0.0563465	1.41319	0.157599	0.713873	FOXK1	No	No	No
ENSG00000069702	2100.95	-0.108947	0.0771017	-1.41303	0.157648	0.713873	TGFBR3	No	No	No
ENSG00000170542	3184.66	0.142754	0.101045	1.41277	0.157722	0.713873	SERPINB9	No	No	No
ENSG00000168944	3544.68	0.0791519	0.056034	1.41257	0.157782	0.713873	CEP120	No	No	No
ENSG00000117523	6524.9	-0.0739494	0.0523532	-1.41251	0.1578	0.713873	PRRC2C	No	No	No
ENSG00000054267	5666.45	0.0513734	0.0363969	1.41148	0.158103	0.713873	ARID4B	No	No	No
ENSG00000185721	2485.67	0.0483457	0.0342557	1.41132	0.15815	0.713873	DRG1	No	No	No
ENSG00000180096	10162.5	-0.0492838	0.0349302	-1.41092	0.158268	0.713873	SEPT1	No	No	No
ENSG00000135272	11635.5	0.0900178	0.0638092	1.41073	0.158323	0.713873	MDFIC	No	No	No
ENSG00000086189	3956.85	0.0537874	0.0381387	1.41031	0.158449	0.713873	DIMT1	No	No	No
ENSG00000063177	104923	-0.0568895	0.0403442	-1.4101	0.158509	0.713873	RPL18	No	No	No
ENSG00000125870	3705.03	-0.0384788	0.0273155	-1.40868	0.158929	0.714609	SNRPB2	No	No	No
ENSG00000254999	8399.41	-0.0348051	0.0247119	-1.40843	0.159003	0.714609	BRK1	No	No	No
ENSG00000171824	2822.75	0.0359298	0.025514	1.40824	0.159061	0.714609	EXOSC10	No	No	No
ENSG00000123338	11110	0.0396133	0.0281525	1.4071	0.159398	0.714901	NCKAP1L	No	No	No
ENSG00000140199	3143.09	0.0719751	0.0511521	1.40708	0.159404	0.714901	SLC12A6	No	No	No
ENSG00000080546	2423.09	0.163822	0.116458	1.40671	0.159514	0.714901	SESN1	No	No	No
ENSG00000138777	2118.93	-0.058883	0.0418917	-1.4056	0.159843	0.715677	PPA2	No	No	No
ENSG00000154370	1636.06	-0.0593833	0.0422593	-1.40521	0.159958	0.715677	TRIM11	No	No	No
ENSG00000013523	1808.54	0.075089	0.053451	1.40482	0.160075	0.715677	ANGEL1	No	No	No
ENSG00000130939	2473.24	-0.0343055	0.0244329	-1.40407	0.160298	0.716091	UBE4B	No	No	No
ENSG00000188404	72492.9	0.113922	0.0811643	1.40359	0.16044	0.716147	SELL	No	No	No
ENSG00000093144	2725.53	0.0473685	0.0337975	1.40154	0.161053	0.717681	ECHDC1	No	No	No
ENSG00000143891	1810.81	-0.0738601	0.0527075	-1.40132	0.161118	0.717681	GALM	No	No	No
ENSG00000068650	1701.03	0.06524	0.0465636	1.4011	0.161186	0.717681	ATP11A	No	No	No
ENSG00000197323	2981.76	0.0344015	0.0245732	1.39996	0.161525	0.717681	TRIM33	No	No	No
ENSG00000183617	1883.93	-0.060558	0.0432571	-1.39995	0.161527	0.717681	MRPL54	No	No	No
ENSG00000179918	4998.93	-0.0524545	0.0375052	-1.39859	0.161935	0.717681	SEPHS2	No	No	No
ENSG00000155366	1896.39	-0.1295	0.0926365	-1.39794	0.162131	0.717681	RHOC	No	No	No
ENSG00000183530	1514.45	0.0706807	0.0505632	1.39787	0.162152	0.717681	PRR14L	No	No	No
ENSG00000174840	1540.72	0.0748443	0.0535596	1.3974	0.162293	0.717681	PDE12	No	No	No
ENSG00000123684	2862.46	0.0870972	0.0623395	1.39714	0.16237	0.717681	LPGAT1	No	No	No
ENSG00000173486	1492.42	-0.0766569	0.0548747	-1.39694	0.162431	0.717681	FKBP2	No	No	No
ENSG00000110011	1546.42	-0.0657996	0.0471049	-1.39687	0.162452	0.717681	DNAJC4	No	No	No
ENSG00000140455	3297.36	0.0480667	0.0344145	1.3967	0.162505	0.717681	USP3	No	No	No
ENSG00000135940	3920.82	-0.0388372	0.0278136	-1.39634	0.162612	0.717681	COX5B	No	No	No
ENSG00000112182	2551.52	0.1033	0.0740086	1.39579	0.162779	0.717681	BACH2	No	No	No
ENSG00000110395	4868.51	0.0622928	0.0446618	1.39477	0.163086	0.717681	CBL	No	No	No
ENSG00000109332	23205.6	0.0406218	0.0291324	1.39439	0.163201	0.717681	UBE2D3	No	No	No
ENSG00000160818	1725.55	0.0516499	0.0370526	1.39396	0.163329	0.717681	GPATCH4	No	No	No
ENSG00000136381	3508.95	0.0472047	0.0338667	1.39384	0.163366	0.717681	IREB2	No	No	No
ENSG00000103549	3424.72	-0.0321624	0.0230758	-1.39377	0.163387	0.717681	RNF40	No	No	No
ENSG00000068400	1685.6	-0.0513587	0.0368596	-1.39336	0.163511	0.717681	GRIPAP1	No	No	No
ENSG00000156675	1552.09	-0.089282	0.0641102	-1.39263	0.163731	0.717845	RAB11FIP1	No	No	No
ENSG00000150991	78195.7	0.0475117	0.0341227	1.39238	0.163808	0.717845	UBC	No	No	No
ENSG00000108599	2027.66	0.0427089	0.0306867	1.39177	0.163992	0.718083	AKAP10	No	No	No
ENSG00000274081	2992.18	0.0718604	0.0516675	1.39083	0.164278	0.71811	PUF60	No	No	No
ENSG00000100644	4056.94	0.069818	0.0502089	1.39055	0.164362	0.71811	HIF1A	No	No	No
ENSG00000149925	26426.1	-0.0405363	0.0291536	-1.39044	0.164396	0.71811	ALDOA	No	No	No
ENSG00000137509	2822.88	0.046813	0.0336776	1.39004	0.164518	0.71811	PRCP	No	No	No
ENSG00000115561	5530.9	0.0367316	0.0264502	1.38871	0.164922	0.719052	CHMP3	No	No	No
ENSG00000100335	2950.08	0.0368293	0.0265266	1.38839	0.165018	0.719052	MIEF1	No	No	No
ENSG00000140983	1918.73	-0.056785	0.0409101	-1.38804	0.165124	0.719052	RHOT2	No	No	No
ENSG00000111801	6149.43	0.1008	0.0726943	1.38662	0.165557	0.720139	BTN3A3	No	No	No
ENSG00000123091	5261.85	-0.0952319	0.0686916	-1.38637	0.165635	0.720139	RNF11	No	No	No
ENSG00000108375	1558.94	-0.0819628	0.0591525	-1.38562	0.165863	0.720548	RNF43	No	No	No
ENSG00000278458	1506.61	-1.40851	1.01714	-1.38478	0.16612	0.720548	KANSL1	No	No	No
ENSG00000138614	1464.84	-0.0882465	0.063726	-1.38478	0.16612	0.720548	INTS14	No	No	No
ENSG00000133706	5835.04	0.0592971	0.0428552	1.38366	0.166462	0.721467	LARS	No	No	No
ENSG00000067334	3941.85	0.0387779	0.0280363	1.38313	0.166625	0.721608	DNTTIP2	No	No	No
ENSG00000001629	2391.86	0.0552418	0.0399575	1.38251	0.166814	0.721858	ANKIB1	No	No	No
ENSG00000134107	1557.6	-0.178522	0.129228	-1.38145	0.167141	0.72271	BHLHE40	No	No	No
ENSG00000133561	18123.6	0.0706526	0.0511783	1.38052	0.167427	0.722736	GIMAP6	No	No	No
ENSG00000170004	14674.6	0.0364815	0.0264416	1.3797	0.167678	0.722736	CHD3	No	No	No
ENSG00000198624	9804.61	0.0609039	0.0441497	1.37949	0.167745	0.722736	CCDC69	No	No	No
ENSG00000154153	3364.87	0.0822124	0.0595969	1.37948	0.167748	0.722736	RETREG1	No	No	No
ENSG00000120913	3048.98	-0.0656678	0.0476256	-1.37883	0.167946	0.722736	PDLIM2	No	No	No
ENSG00000137815	3505.1	-0.0317019	0.022992	-1.37883	0.167948	0.722736	RTF1	No	No	No
ENSG00000142657	3576.81	0.0824355	0.0598279	1.37788	0.168241	0.722736	PGD	No	No	No
ENSG00000167182	1943.13	-0.0753914	0.0547319	-1.37747	0.168368	0.722736	SP2	No	No	No
ENSG00000132383	8422.58	-0.0532985	0.0387172	-1.37661	0.168633	0.722736	RPA1	No	No	No
ENSG00000159363	2318.78	-0.0645456	0.0468885	-1.37658	0.168643	0.722736	ATP13A2	No	No	No
ENSG00000145494	1869.65	-0.0429036	0.0311904	-1.37554	0.168965	0.722736	NDUFS6	No	No	No
ENSG00000139726	4906.14	0.0500124	0.0363619	1.37541	0.169006	0.722736	DENR	No	No	No
ENSG00000151239	1872.35	0.0417229	0.0303393	1.37521	0.169067	0.722736	TWF1	No	No	No
ENSG00000003056	13945.8	-0.0440951	0.0320664	-1.37512	0.169095	0.722736	M6PR	No	No	No
ENSG00000186918	4310.58	0.0583361	0.0424603	1.3739	0.169474	0.722736	ZNF395	No	No	No
ENSG00000196498	5059.18	-0.0861815	0.0627352	-1.37374	0.169524	0.722736	NCOR2	No	No	No
ENSG00000077984	2311.85	-0.184731	0.134493	-1.37354	0.169584	0.722736	CST7	No	No	No
ENSG00000105401	6910.14	-0.0436041	0.0317489	-1.37341	0.169626	0.722736	CDC37	No	No	No
ENSG00000125484	1489.06	0.0464078	0.0338013	1.37296	0.169764	0.722736	GTF3C4	No	No	No
ENSG00000143761	16534.1	-0.0280365	0.0204267	-1.37254	0.169896	0.722736	ARF1	No	No	No
ENSG00000154001	3063.95	0.0514702	0.0375051	1.37235	0.169954	0.722736	PPP2R5E	No	No	No
ENSG00000168234	5110.28	0.060117	0.0438185	1.37196	0.170077	0.722736	TTC39C	No	No	No
ENSG00000106554	1599.83	0.0448512	0.0326974	1.3717	0.170155	0.722736	CHCHD3	No	No	No
ENSG00000107021	1791.2	-0.0438083	0.0319652	-1.3705	0.17053	0.723772	TBC1D13	No	No	No
ENSG00000100888	4350.04	0.0357314	0.0260883	1.36964	0.1708	0.724313	CHD8	No	No	No
ENSG00000055070	9101.65	0.0315143	0.0230157	1.36925	0.17092	0.724313	SZRD1	No	No	No
ENSG00000162434	26353.8	0.0443997	0.0324739	1.36725	0.171549	0.725117	JAK1	No	No	No
ENSG00000179364	1562.19	-0.0602476	0.0440773	-1.36686	0.171668	0.725117	PACS2	No	No	No
ENSG00000162909	12387.3	-0.0491156	0.0359457	-1.36638	0.171818	0.725117	CAPN2	No	No	No
ENSG00000139719	2406.46	-0.0432508	0.0316746	-1.36547	0.172105	0.725117	VPS33A	No	No	No
ENSG00000215788	1645.55	-0.098382	0.0720942	-1.36463	0.172369	0.725117	TNFRSF25	No	No	No
ENSG00000132155	4485.95	-0.0281139	0.0206034	-1.36453	0.172401	0.725117	RAF1	No	No	No
ENSG00000132406	1396.14	-0.0644025	0.0472033	-1.36437	0.172452	0.725117	TMEM128	No	No	No
ENSG00000115306	8326.26	0.079853	0.0585299	1.36431	0.172469	0.725117	SPTBN1	No	No	No
ENSG00000136100	3421.31	-0.0349239	0.0256123	-1.36356	0.172706	0.725117	VPS36	No	No	No
ENSG00000131023	3092.56	0.047161	0.0345907	1.3634	0.172756	0.725117	LATS1	No	No	No
ENSG00000157106	8058.26	0.0781693	0.057401	1.36181	0.173258	0.725117	SMG1	No	No	No
ENSG00000040633	1816.69	-0.0563416	0.0413793	-1.36159	0.173328	0.725117	PHF23	No	No	No
ENSG00000188641	3931.52	0.0741788	0.0544802	1.36157	0.173332	0.725117	DPYD	No	No	No
ENSG00000089154	4374.69	0.0480413	0.0352857	1.3615	0.173357	0.725117	GCN1	No	No	No
ENSG00000197930	4613.56	0.0477711	0.0350981	1.36107	0.173491	0.725117	ERO1A	No	No	No
ENSG00000125651	4915.82	0.0424101	0.0311596	1.36106	0.173495	0.725117	GTF2F1	No	No	No
ENSG00000148484	5829.46	-0.0678262	0.0498527	-1.36053	0.173662	0.725117	RSU1	No	No	No
ENSG00000105372	122115	-0.050988	0.0374768	-1.36052	0.173665	0.725117	RPS19	No	No	No
ENSG00000142784	4249.72	-0.0566109	0.0416427	-1.35945	0.174006	0.725117	WDTC1	No	No	No
ENSG00000148834	3811.05	-0.0539162	0.039661	-1.35943	0.174011	0.725117	GSTO1	No	No	No
ENSG00000163444	4006.04	0.0310408	0.0228365	1.35926	0.174063	0.725117	TMEM183A	No	No	No
ENSG00000159348	2231.56	-0.052983	0.0389909	-1.35886	0.174192	0.725117	CYB5R1	No	No	No
ENSG00000032389	1439.68	0.0502368	0.0369744	1.35869	0.174244	0.725117	TSSC1	No	No	No
ENSG00000159840	12650.5	-0.0889647	0.0654804	-1.35864	0.174259	0.725117	ZYX	No	No	No
ENSG00000163322	2024.87	0.0551231	0.0405984	1.35777	0.174538	0.725696	FAM175A	No	No	No
ENSG00000013374	6310.86	0.0753624	0.0555205	1.35738	0.174661	0.725696	NUB1	No	No	No
ENSG00000159202	5692.52	0.0372491	0.0274562	1.35667	0.174885	0.725765	UBE2Z	No	No	No
ENSG00000160908	1705.87	0.0601024	0.044307	1.3565	0.17494	0.725765	ZNF394	No	No	No
ENSG00000117298	6454.84	-0.0333855	0.0246271	-1.35564	0.175213	0.725766	ECE1	No	No	No
ENSG00000165119	43433.2	0.0373415	0.0275532	1.35525	0.175337	0.725766	HNRNPK	No	No	No
ENSG00000144840	1807.23	0.0541096	0.0399311	1.35507	0.175394	0.725766	RABL3	No	No	No
ENSG00000111640	47295.7	-0.0705813	0.0520954	-1.35485	0.175466	0.725766	GAPDH	No	No	No
ENSG00000131508	8755.75	0.0444493	0.0328393	1.35354	0.175884	0.726515	UBE2D2	No	No	No
ENSG00000129518	3420.97	0.0372513	0.027525	1.35336	0.17594	0.726515	EAPP	No	No	No
ENSG00000103490	1686.43	0.0492561	0.0364153	1.35262	0.176177	0.726515	PYCARD	No	No	No
ENSG00000215021	11860.8	0.0452449	0.0334516	1.35255	0.1762	0.726515	PHB2	No	No	No
ENSG00000164327	2259.69	0.0730723	0.0540387	1.35222	0.176304	0.726515	RICTOR	No	No	No
ENSG00000239713	3038.75	-0.0877024	0.0648795	-1.35177	0.176448	0.726567	APOBEC3G	No	No	No
ENSG00000111716	67158.7	0.0517732	0.0383127	1.35133	0.176589	0.726605	LDHB	No	No	No
ENSG00000125386	2015.67	-0.0623717	0.0461737	-1.3508	0.176758	0.72676	FAM193A	No	No	No
ENSG00000159720	2586.37	-0.0411922	0.0305114	-1.35006	0.176997	0.727043	ATP6V0D1	No	No	No
ENSG00000124228	3640.29	-0.0415101	0.0307535	-1.34977	0.17709	0.727043	DDX27	No	No	No
ENSG00000108021	1811.41	0.0761706	0.0564997	1.34816	0.177608	0.728627	FAM208B	No	No	No
ENSG00000171314	11172.3	-0.0406586	0.0301775	-1.34732	0.177878	0.729059	PGAM1	No	No	No
ENSG00000177565	4004.65	0.071681	0.0532149	1.34701	0.177977	0.729059	TBL1XR1	No	No	No
ENSG00000146872	2023.4	0.0314755	0.0233742	1.34659	0.178111	0.729067	TLK2	No	No	No
ENSG00000133321	7799.43	-0.0704896	0.0524139	-1.34487	0.178669	0.729787	RARRES3	No	No	No
ENSG00000214753	10707.6	-0.0419247	0.031174	-1.34486	0.17867	0.729787	HNRNPUL2	No	No	No
ENSG00000163743	2391.57	0.0519059	0.0385968	1.34482	0.178683	0.729787	RCHY1	No	No	No
ENSG00000000419	2183.54	-0.0368975	0.0274654	-1.34342	0.179136	0.730467	DPM1	No	No	No
ENSG00000163754	1871.41	-0.0893245	0.0665217	-1.34279	0.179341	0.730467	GYG1	No	No	No
ENSG00000182568	14765.9	0.067252	0.0500935	1.34253	0.179425	0.730467	SATB1	No	No	No
ENSG00000134910	3460.5	-0.0503012	0.0374741	-1.34229	0.179501	0.730467	STT3A	No	No	No
ENSG00000269713	1497.5	0.0856981	0.0638584	1.342	0.179595	0.730467	NBPF9	No	No	No
ENSG00000111707	2436.98	0.0446834	0.0333058	1.34161	0.179722	0.730467	SUDS3	No	No	No
ENSG00000140526	4171.27	0.0453438	0.0338021	1.34145	0.179775	0.730467	ABHD2	No	No	No
ENSG00000187764	14103.6	0.0698246	0.0521015	1.34016	0.180192	0.731125	SEMA4D	No	No	No
ENSG00000187742	1997	-0.0466615	0.0348494	-1.33895	0.180588	0.731125	SECISBP2	No	No	No
ENSG00000159792	1529.96	0.0585036	0.0436984	1.3388	0.180634	0.731125	PSKH1	No	No	No
ENSG00000125457	1632.67	-0.0424123	0.0316832	-1.33864	0.180688	0.731125	MIF4GD	No	No	No
ENSG00000173821	15086.5	0.0806037	0.0602447	1.33794	0.180916	0.731125	RNF213	No	No	No
ENSG00000140443	1789.25	0.0860061	0.0643038	1.3375	0.181061	0.731125	IGF1R	No	No	No
ENSG00000124406	2182.84	0.0861475	0.064422	1.33724	0.181145	0.731125	ATP8A1	No	No	No
ENSG00000237889	2267.84	-0.0903454	0.0675658	-1.33715	0.181174	0.731125	DDX39B	No	No	No
ENSG00000116221	2018.55	-0.0342476	0.0256154	-1.33699	0.181225	0.731125	MRPL37	No	No	No
ENSG00000138674	7057.15	0.0392631	0.0293691	1.33689	0.18126	0.731125	SEC31A	No	No	No
ENSG00000270629	1637.9	-0.120799	0.0904174	-1.33602	0.181543	0.731733	NBPF14	No	No	No
ENSG00000134291	1391.79	-0.063671	0.0477032	-1.33473	0.181963	0.732463	TMEM106C	No	No	No
ENSG00000125148	1601.54	-0.149427	0.111965	-1.33458	0.182013	0.732463	MT2A	No	No	No
ENSG00000115295	1637.29	0.0664538	0.0498171	1.33396	0.182218	0.732463	CLIP4	No	No	No
ENSG00000100441	3967.31	-0.0532151	0.039896	-1.33385	0.182254	0.732463	KHNYN	No	No	No
ENSG00000130764	2303.36	0.0424414	0.0318347	1.33318	0.182474	0.732812	LRRC47	No	No	No
ENSG00000145349	2150.51	0.0515202	0.0386717	1.33225	0.182779	0.733506	CAMK2D	No	No	No
ENSG00000160685	4467.02	-0.0530124	0.0398212	-1.33126	0.183103	0.733991	ZBTB7B	No	No	No
ENSG00000149547	1739.77	0.0378341	0.0284311	1.33073	0.183278	0.733991	EI24	No	No	No
ENSG00000211455	1366.19	0.0672792	0.0505605	1.33067	0.183299	0.733991	STK38L	No	No	No
ENSG00000115687	4188.26	0.213627	0.160631	1.32993	0.183543	0.734437	PASK	No	No	No
ENSG00000134285	1687.86	-0.0959356	0.0722333	-1.32814	0.184133	0.736267	FKBP11	No	No	No
ENSG00000198589	4597.59	0.0603179	0.0454373	1.3275	0.184345	0.736328	LRBA	No	No	No
ENSG00000133112	685540	0.056845	0.0428591	1.32632	0.184733	0.736328	TPT1	No	No	No
ENSG00000174606	1645.04	0.0552898	0.0416923	1.32614	0.184794	0.736328	ANGEL2	No	No	No
ENSG00000164603	1377.78	0.0712712	0.0537618	1.32568	0.184944	0.736328	BMT2	No	No	No
ENSG00000166734	4837.87	0.0462118	0.0348694	1.32528	0.185078	0.736328	CASC4	No	No	No
ENSG00000128739	11068.9	-0.0438412	0.0330882	-1.32498	0.185177	0.736328	SNRPN	No	No	No
ENSG00000188042	25355.6	-0.047483	0.0358472	-1.3246	0.185305	0.736328	ARL4C	No	No	No
ENSG00000169714	27375.4	0.0400101	0.0302059	1.32458	0.18531	0.736328	CNBP	No	No	No
ENSG00000196998	1499.15	0.0547332	0.0413247	1.32447	0.185348	0.736328	WDR45	No	No	No
ENSG00000223496	1900.66	-0.0860245	0.0649792	-1.32388	0.185544	0.736578	EXOSC6	No	No	No
ENSG00000141580	2191.93	0.0588791	0.044496	1.32325	0.185754	0.736881	WDR45B	No	No	No
ENSG00000128908	2130.87	0.0401591	0.0303654	1.32253	0.185992	0.737298	INO80	No	No	No
ENSG00000169740	1742.14	0.0526472	0.0398551	1.32096	0.186514	0.737703	ZNF32	No	No	No
ENSG00000103496	2035.21	-0.0505565	0.0382894	-1.32038	0.186708	0.737703	STX4	No	No	No
ENSG00000072364	2849.71	0.0627022	0.0474882	1.32037	0.18671	0.737703	AFF4	No	No	No
ENSG00000117450	5977.38	-0.0528759	0.0400468	-1.32035	0.186718	0.737703	PRDX1	No	No	No
ENSG00000184897	12045	-0.0793384	0.0600949	-1.32022	0.186762	0.737703	H1FX	No	No	No
ENSG00000106683	1481.19	-0.0622765	0.0472161	-1.31897	0.18718	0.738602	LIMK1	No	No	No
ENSG00000184708	1371.97	-0.03553	0.0269521	-1.31827	0.187414	0.738602	EIF4ENIF1	No	No	No
ENSG00000135837	4494.52	0.0591444	0.04488	1.31783	0.187559	0.738602	CEP350	No	No	No
ENSG00000124155	2624.25	-0.0393345	0.0298626	-1.31718	0.187777	0.738602	PIGT	No	No	No
ENSG00000233276	7875.66	-0.119754	0.0909344	-1.31692	0.187864	0.738602	GPX1	No	No	No
ENSG00000134153	2162.8	-0.0398909	0.030297	-1.31666	0.187951	0.738602	EMC7	No	No	No
ENSG00000185129	2329.4	0.0601948	0.0457301	1.31631	0.188071	0.738602	PURA	No	No	No
ENSG00000088930	6880.1	0.0364402	0.0277157	1.31478	0.188583	0.738602	XRN2	No	No	No
ENSG00000167460	9595.32	-0.107667	0.0819389	-1.31399	0.188849	0.738602	TPM4	No	No	No
ENSG00000204160	3080.06	-0.0669553	0.0509658	-1.31373	0.188937	0.738602	ZDHHC18	No	No	No
ENSG00000147403	296863	-0.0477691	0.0363643	-1.31363	0.188971	0.738602	RPL10	No	No	No
ENSG00000075239	1643.49	0.0736093	0.0560526	1.31322	0.18911	0.738602	ACAT1	No	No	No
ENSG00000102317	16932.6	0.0807503	0.0614907	1.31321	0.189112	0.738602	RBM3	No	No	No
ENSG00000146729	2040.16	0.038635	0.0294205	1.3132	0.189116	0.738602	NIPSNAP2	No	No	No
ENSG00000115085	8001.9	-0.0487384	0.0371271	-1.31274	0.18927	0.738602	ZAP70	No	No	No
ENSG00000100596	2613.31	0.0552983	0.0421341	1.31244	0.189373	0.738602	SPTLC2	No	No	No
ENSG00000166478	1540.31	0.0571617	0.0435735	1.31185	0.189572	0.738602	ZNF143	No	No	No
ENSG00000111860	1777.97	0.0514239	0.0392019	1.31177	0.189598	0.738602	CEP85L	No	No	No
ENSG00000092199	40009.7	-0.0402273	0.03068	-1.31119	0.189794	0.738602	HNRNPC	No	No	No
ENSG00000138688	3041.53	0.0665053	0.0507455	1.31057	0.190004	0.738602	KIAA1109	No	No	No
ENSG00000088888	2477.51	-0.0525268	0.0400897	-1.31023	0.190117	0.738602	MAVS	No	No	No
ENSG00000122034	10445.5	0.0506109	0.0386277	1.31022	0.19012	0.738602	GTF3A	No	No	No
ENSG00000173327	3455.53	-0.0625154	0.0477181	-1.3101	0.190163	0.738602	MAP3K11	No	No	No
ENSG00000061794	2707.17	0.0356076	0.027187	1.30973	0.190288	0.738602	MRPS35	No	No	No
ENSG00000104946	1693.86	-0.0705736	0.0539013	-1.30931	0.190428	0.738602	TBC1D17	No	No	No
ENSG00000168172	1389.86	0.0727292	0.0555521	1.30921	0.190465	0.738602	HOOK3	No	No	No
ENSG00000134516	10327	0.0376616	0.0287924	1.30804	0.190861	0.738924	DOCK2	No	No	No
ENSG00000116679	6159.4	-0.072245	0.0552476	-1.30766	0.19099	0.738924	IVNS1ABP	No	No	No
ENSG00000126432	4772.52	-0.0419461	0.0320791	-1.30759	0.191014	0.738924	PRDX5	No	No	No
ENSG00000133226	4936.22	-0.0473687	0.0362587	-1.30641	0.191414	0.738924	SRRM1	No	No	No
ENSG00000175073	2600.09	0.080576	0.0617008	1.30592	0.191581	0.738924	VCPIP1	No	No	No
ENSG00000089820	7030.5	-0.0403811	0.0309236	-1.30583	0.191609	0.738924	ARHGAP4	No	No	No
ENSG00000241343	63344.9	-0.0504355	0.0386241	-1.3058	0.191619	0.738924	RPL36A	No	No	No
ENSG00000182162	16254.1	0.0608915	0.0466322	1.30578	0.191627	0.738924	P2RY8	No	No	No
ENSG00000014919	1426.16	0.0534365	0.0409344	1.30542	0.191751	0.738924	COX15	No	No	No
ENSG00000082701	3192.72	0.0482344	0.0369931	1.30388	0.192276	0.739951	GSK3B	No	No	No
ENSG00000206527	3005.71	0.0578262	0.0443504	1.30385	0.192285	0.739951	HACD2	No	No	No
ENSG00000114978	9874.14	0.0480064	0.0368519	1.30269	0.192682	0.74059	MOB1A	No	No	No
ENSG00000024048	2335.61	0.0672887	0.0516581	1.30258	0.19272	0.74059	UBR2	No	No	No
ENSG00000134109	7023.5	0.056291	0.0432411	1.30179	0.192987	0.741102	EDEM1	No	No	No
ENSG00000185658	2588.08	0.0521816	0.0401113	1.30092	0.193286	0.741733	BRWD1	No	No	No
ENSG00000088038	2106.77	-0.0902638	0.0694115	-1.30042	0.193459	0.741883	CNOT3	No	No	No
ENSG00000164597	2207.11	0.121194	0.0932499	1.29967	0.193715	0.74235	COG5	No	No	No
ENSG00000120802	8757.14	0.0591648	0.0455461	1.29901	0.193941	0.742496	TMPO	No	No	No
ENSG00000067955	6681.82	0.0419703	0.0323154	1.29877	0.194022	0.742496	CBFB	No	No	No
ENSG00000147679	1712.5	0.0576544	0.0444055	1.29836	0.194163	0.742521	UTP23	No	No	No
ENSG00000115232	12451.2	-0.0995734	0.0767557	-1.29728	0.194536	0.743434	ITGA4	No	No	No
ENSG00000126107	1446.94	-0.0653681	0.0504188	-1.2965	0.194802	0.743768	HECTD3	No	No	No
ENSG00000124299	2536.09	-0.0421758	0.032537	-1.29624	0.194892	0.743768	PEPD	No	No	No
ENSG00000143442	3418.62	0.0462372	0.0357209	1.2944	0.195527	0.745246	POGZ	No	No	No
ENSG00000126353	20629	0.128884	0.0995754	1.29434	0.19555	0.745246	CCR7	No	No	No
ENSG00000117222	1729.12	0.063194	0.0488392	1.29392	0.195694	0.745281	RBBP5	No	No	No
ENSG00000127884	2502.26	-0.0321895	0.0249057	-1.29245	0.196201	0.746698	ECHS1	No	No	No
ENSG00000166889	3074.84	-0.0463993	0.0359805	-1.28957	0.197201	0.749548	PATL1	No	No	No
ENSG00000115966	2603.06	0.0558152	0.0432963	1.28914	0.197348	0.749548	ATF2	No	No	No
ENSG00000143222	6414.12	-0.0300903	0.023344	-1.28899	0.197401	0.749548	UFC1	No	No	No
ENSG00000134287	7918.1	-0.0411323	0.0319262	-1.28836	0.197621	0.749548	ARF3	No	No	No
ENSG00000070061	2292.77	-0.0438838	0.0341035	-1.28678	0.19817	0.749548	IKBKAP	No	No	No
ENSG00000114796	1956.24	0.0998015	0.0775622	1.28673	0.198188	0.749548	KLHL24	No	No	No
ENSG00000119013	2160.05	-0.0415852	0.0323288	-1.28632	0.198332	0.749548	NDUFB3	No	No	No
ENSG00000108344	3934.11	-0.0382132	0.0297093	-1.28624	0.198361	0.749548	PSMD3	No	No	No
ENSG00000081019	3318.77	0.0595654	0.0463257	1.2858	0.198514	0.749548	RSBN1	No	No	No
ENSG00000179409	1646.17	0.0613394	0.0477099	1.28567	0.198557	0.749548	GEMIN4	No	No	No
ENSG00000109685	1678.1	-0.0465955	0.036243	-1.28564	0.198568	0.749548	NSD2	No	No	No
ENSG00000135441	2189.94	-0.052536	0.0408645	-1.28562	0.198577	0.749548	BLOC1S1	No	No	No
ENSG00000186063	6049.04	0.0434294	0.0338077	1.2846	0.198932	0.74994	AIDA	No	No	No
ENSG00000100813	5801.09	-0.0401256	0.0312394	-1.28445	0.198983	0.74994	ACIN1	No	No	No
ENSG00000213246	4253.57	-0.0331484	0.0258134	-1.28415	0.199088	0.74994	SUPT4H1	No	No	No
ENSG00000111796	8280.28	-0.197316	0.153727	-1.28355	0.1993	0.750225	KLRB1	No	No	No
ENSG00000161203	10377.2	-0.0396428	0.0309035	-1.28279	0.199566	0.750254	AP2M1	No	No	No
ENSG00000117625	1761.57	0.0490847	0.0382651	1.28275	0.199579	0.750254	RCOR3	No	No	No
ENSG00000160185	4249.68	0.0596017	0.0464854	1.28216	0.199787	0.75032	UBASH3A	No	No	No
ENSG00000116984	2187.69	0.067179	0.0524222	1.2815	0.200018	0.75032	MTR	No	No	No
ENSG00000168685	97182.7	0.111886	0.0873184	1.28136	0.200069	0.75032	IL7R	No	No	No
ENSG00000197037	1800.36	0.0514727	0.04018	1.28105	0.200175	0.75032	ZSCAN25	No	No	No
ENSG00000230989	1788.58	-0.0462966	0.0361489	-1.28072	0.200292	0.75032	HSBP1	No	No	No
ENSG00000150995	2219	0.0553717	0.0432463	1.28038	0.200411	0.75032	ITPR1	No	No	No
ENSG00000146859	1565.47	-0.130311	0.101811	-1.27993	0.200569	0.750403	TMEM140	No	No	No
ENSG00000166340	7844.02	-0.0504981	0.0395169	-1.27789	0.201289	0.751642	TPP1	No	No	No
ENSG00000106244	4942.78	-0.0439702	0.0344116	-1.27777	0.20133	0.751642	PDAP1	No	No	No
ENSG00000126561	7687.36	0.0519241	0.0406405	1.27765	0.201374	0.751642	STAT5A	No	No	No
ENSG00000132718	1611.58	-0.0877905	0.0687234	-1.27745	0.201444	0.751642	SYT11	No	No	No
ENSG00000170291	1374.69	-0.0432517	0.0338873	-1.27634	0.201835	0.752273	ELP5	No	No	No
ENSG00000145649	3569.72	-0.15759	0.123484	-1.2762	0.201886	0.752273	GZMA	No	No	No
ENSG00000137100	2472.28	-0.0404637	0.0317237	-1.2755	0.202132	0.752502	DCTN3	No	No	No
ENSG00000101544	1996.16	0.043833	0.034372	1.27525	0.202219	0.752502	ADNP2	No	No	No
ENSG00000151502	4666.5	-0.0422326	0.0331439	-1.27422	0.202585	0.752912	VPS26B	No	No	No
ENSG00000143924	5263.65	0.0544391	0.042733	1.27393	0.202687	0.752912	EML4	No	No	No
ENSG00000128340	38832.1	-0.0524334	0.0411677	-1.27365	0.202786	0.752912	RAC2	No	No	No
ENSG00000161013	2522.88	-0.087227	0.0685099	-1.2732	0.202946	0.752912	MGAT4B	No	No	No
ENSG00000036549	2555.04	0.0358045	0.0281256	1.27302	0.203011	0.752912	ZZZ3	No	No	No
ENSG00000167085	4467.69	0.0405782	0.0318903	1.27243	0.20322	0.753181	PHB	No	No	No
ENSG00000196843	3313.2	0.0560227	0.0440596	1.27152	0.203543	0.753597	ARID5A	No	No	No
ENSG00000147649	9258.33	0.0350805	0.0275931	1.27135	0.203605	0.753597	MTDH	No	No	No
ENSG00000182866	29289.9	0.041021	0.0323004	1.26999	0.20409	0.754886	LCK	No	No	No
ENSG00000160216	3935.98	-0.0355054	0.0279804	-1.26894	0.204463	0.755759	AGPAT3	No	No	No
ENSG00000275122	2337.78	0.0551723	0.0435015	1.26829	0.204696	0.756116	THEMIS	No	No	No
ENSG00000161091	1700.54	-0.0744413	0.0588314	-1.26533	0.205752	0.758058	MFSD12	No	No	No
ENSG00000256618	13082.5	-0.15767	0.124632	-1.26509	0.20584	0.758058	MTRNR2L1	No	No	No
ENSG00000187601	2325.16	-0.0486732	0.0384818	-1.26484	0.20593	0.758058	MAGEH1	No	No	No
ENSG00000178764	2863.52	0.048677	0.0384893	1.26469	0.205982	0.758058	ZHX2	No	No	No
ENSG00000171311	1391.41	-0.0424741	0.0335872	-1.26459	0.206017	0.758058	EXOSC1	No	No	No
ENSG00000102753	2978.57	0.0477207	0.0377383	1.26452	0.206045	0.758058	KPNA3	No	No	No
ENSG00000154767	4283.55	-0.0407176	0.0322218	-1.26367	0.20635	0.758111	XPC	No	No	No
ENSG00000122741	1644.67	0.0420354	0.0332647	1.26366	0.206351	0.758111	DCAF10	No	No	No
ENSG00000165209	1383.53	0.0484175	0.0383364	1.26297	0.206601	0.758111	STRBP	No	No	No
ENSG00000186810	1770.43	-0.165178	0.130789	-1.26294	0.206612	0.758111	CXCR3	No	No	No
ENSG00000140395	1924.75	0.043012	0.0340671	1.26257	0.206745	0.758111	WDR61	No	No	No
ENSG00000140740	8447.93	0.0378434	0.0299869	1.262	0.20695	0.758361	UQCRC2	No	No	No
ENSG00000090863	15705.2	0.0368348	0.0292078	1.26113	0.207261	0.758997	GLG1	No	No	No
ENSG00000169221	2444.06	-0.0465118	0.036916	-1.25993	0.207693	0.760012	TBC1D10B	No	No	No
ENSG00000146701	6862.82	-0.0440232	0.0349501	-1.2596	0.207814	0.760012	MDH2	No	No	No
ENSG00000117395	1637.11	-0.0445847	0.0354244	-1.25859	0.20818	0.760847	EBNA1BP2	No	No	No
ENSG00000116560	10189.1	0.0408796	0.032499	1.25787	0.208438	0.760995	SFPQ	No	No	No
ENSG00000185262	8002.86	-0.0893138	0.0710128	-1.25771	0.208496	0.760995	UBALD2	No	No	No
ENSG00000163159	2274.21	-0.0424754	0.0338192	-1.25596	0.209132	0.762815	VPS72	No	No	No
ENSG00000077147	8531.18	0.0329726	0.0263037	1.25354	0.21001	0.765283	TM9SF3	No	No	No
ENSG00000099341	4297.29	-0.0325043	0.0259418	-1.25297	0.210217	0.765283	PSMD8	No	No	No
ENSG00000130024	3559.5	0.0376835	0.030076	1.25295	0.210226	0.765283	PHF10	No	No	No
ENSG00000131467	5120.97	-0.0301671	0.0240887	-1.25234	0.210447	0.765283	PSME3	No	No	No
ENSG00000104765	3509.48	0.0628217	0.0501746	1.25206	0.210548	0.765283	BNIP3L	No	No	No
ENSG00000172943	1975.14	-0.0468707	0.0374424	-1.25181	0.21064	0.765283	PHF8	No	No	No
ENSG00000176542	1513.22	0.0715553	0.0572171	1.25059	0.211083	0.76639	USF3	No	No	No
ENSG00000119041	1543.57	-0.0480316	0.0384238	-1.25005	0.211281	0.766558	GTF3C3	No	No	No
ENSG00000120129	4125.51	0.355502	0.284535	1.24941	0.211514	0.766558	DUSP1	No	No	No
ENSG00000184557	1764.69	-0.295525	0.236547	-1.24933	0.211546	0.766558	SOCS3	No	No	No
ENSG00000174437	2820.8	-0.0450816	0.0361045	-1.24864	0.211796	0.766689	ATP2A2	No	No	No
ENSG00000162368	16086.9	0.0536389	0.0429637	1.24847	0.211859	0.766689	CMPK1	No	No	No
ENSG00000174780	7054.18	0.0426249	0.0341601	1.2478	0.212105	0.767076	SRP72	No	No	No
ENSG00000104998	5933.19	-0.0540214	0.0433243	-1.24691	0.212432	0.767262	IL27RA	No	No	No
ENSG00000198252	4367.66	0.0843957	0.0677094	1.24644	0.212603	0.767262	STYX	No	No	No
ENSG00000153560	5123.9	0.0426205	0.0342074	1.24595	0.212784	0.767262	UBP1	No	No	No
ENSG00000096070	2211.05	-0.0561213	0.0450519	-1.2457	0.212873	0.767262	BRPF3	No	No	No
ENSG00000152409	1768.24	0.0663282	0.0532534	1.24552	0.21294	0.767262	JMY	No	No	No
ENSG00000149084	1612.71	0.154707	0.124226	1.24537	0.212996	0.767262	HSD17B12	No	No	No
ENSG00000100554	1382.86	-0.0533765	0.0428827	-1.24471	0.213238	0.767262	ATP6V1D	No	No	No
ENSG00000074356	2317.2	0.0378383	0.0304012	1.24463	0.213267	0.767262	NCBP3	No	No	No
ENSG00000128050	2641.52	0.05889	0.0473635	1.24336	0.213734	0.768164	PAICS	No	No	No
ENSG00000186222	1749.74	-0.0515338	0.0414566	-1.24308	0.213839	0.768164	BLOC1S4	No	No	No
ENSG00000089220	10298.2	0.0395251	0.031816	1.24231	0.214124	0.768164	PEBP1	No	No	No
ENSG00000119725	2553.59	0.0309762	0.0249387	1.24209	0.214202	0.768164	ZNF410	No	No	No
ENSG00000108946	9682.65	-0.0477156	0.0384245	-1.2418	0.21431	0.768164	PRKAR1A	No	No	No
ENSG00000187778	2502.03	-0.0268887	0.0216573	-1.24155	0.214402	0.768164	MCRS1	No	No	No
ENSG00000071626	4912.74	-0.047601	0.0383569	-1.241	0.214605	0.768164	DAZAP1	No	No	No
ENSG00000127995	1586.03	0.0442609	0.0356674	1.24093	0.21463	0.768164	CASD1	No	No	No
ENSG00000154059	1385.38	0.0718262	0.0579191	1.24011	0.214934	0.768754	IMPACT	No	No	No
ENSG00000132128	2031.2	0.0358231	0.0288963	1.23971	0.215083	0.768789	LRRC41	No	No	No
ENSG00000164164	3754.7	0.0511689	0.0413029	1.23887	0.215394	0.769405	OTUD4	No	No	No
ENSG00000107745	1761.78	-0.0417843	0.0337891	-1.23662	0.216228	0.771885	MICU1	No	No	No
ENSG00000107625	3708.08	0.0307934	0.0249326	1.23507	0.216805	0.771921	DDX50	No	No	No
ENSG00000196591	3548.96	0.0383727	0.0310698	1.23505	0.216813	0.771921	HDAC2	No	No	No
ENSG00000197312	2353.96	0.0426721	0.0345529	1.23498	0.216839	0.771921	DDI2	No	No	No
ENSG00000154305	4695.94	0.0457753	0.0370992	1.23386	0.217254	0.771921	MIA3	No	No	No
ENSG00000101146	1681.11	-0.0439022	0.0355833	-1.23379	0.217282	0.771921	RAE1	No	No	No
ENSG00000033867	1913.45	0.0607024	0.0492339	1.23294	0.217598	0.771921	SLC4A7	No	No	No
ENSG00000104823	5892.81	-0.0439053	0.0356262	-1.23239	0.217805	0.771921	ECH1	No	No	No
ENSG00000079263	2692.77	-0.0708866	0.0575238	-1.2323	0.217837	0.771921	SP140	No	No	No
ENSG00000095139	9004.68	0.0273002	0.0221622	1.23184	0.21801	0.771921	ARCN1	No	No	No
ENSG00000168488	8028.11	-0.0701338	0.0569457	-1.23159	0.218102	0.771921	ATXN2L	No	No	No
ENSG00000102804	2221.12	-0.121697	0.0988429	-1.23122	0.218241	0.771921	TSC22D1	No	No	No
ENSG00000169217	3255.5	-0.0505794	0.0410869	-1.23103	0.21831	0.771921	CD2BP2	No	No	No
ENSG00000141564	2652.32	0.0678543	0.0551262	1.23089	0.218364	0.771921	RPTOR	No	No	No
ENSG00000143553	1366.25	-0.0404021	0.032852	-1.22982	0.218763	0.771921	SNAPIN	No	No	No
ENSG00000103249	1674.17	0.0392463	0.0319489	1.22841	0.219293	0.771921	CLCN7	No	No	No
ENSG00000118855	2996.15	-0.0610532	0.0497013	-1.2284	0.219296	0.771921	MFSD1	No	No	No
ENSG00000147419	2828.62	0.0436118	0.0355083	1.22821	0.219366	0.771921	CCDC25	No	No	No
ENSG00000115808	2663.99	0.0514438	0.0419056	1.22761	0.219593	0.771921	STRN	No	No	No
ENSG00000165802	1594.49	-0.0885416	0.0721332	-1.22747	0.219644	0.771921	NSMF	No	No	No
ENSG00000153107	2990.54	0.0364705	0.0297191	1.22717	0.219757	0.771921	ANAPC1	No	No	No
ENSG00000144021	3589.51	0.0368848	0.0300573	1.22715	0.219766	0.771921	CIAO1	No	No	No
ENSG00000139746	3036.74	0.0396871	0.0323461	1.22695	0.21984	0.771921	RBM26	No	No	No
ENSG00000139697	3520.15	0.0423101	0.0344992	1.22641	0.220045	0.771921	SBNO1	No	No	No
ENSG00000118503	4395.77	-0.0859634	0.0701243	-1.22587	0.220247	0.771921	TNFAIP3	No	No	No
ENSG00000158828	1370.7	0.045238	0.0369037	1.22584	0.220259	0.771921	PINK1	No	No	No
ENSG00000162413	2703.03	-0.0521913	0.0425942	-1.22531	0.220457	0.771921	KLHL21	No	No	No
ENSG00000142168	11263.8	-0.0420442	0.0343131	-1.22531	0.220458	0.771921	SOD1	No	No	No
ENSG00000151623	2008.23	0.0534241	0.0436034	1.22523	0.220489	0.771921	NR3C2	No	No	No
ENSG00000132341	12939.2	0.0379212	0.0309513	1.22519	0.220504	0.771921	RAN	No	No	No
ENSG00000159256	4578.55	0.0487702	0.0398085	1.22512	0.22053	0.771921	MORC3	No	No	No
ENSG00000170185	2616.08	0.0355431	0.0290323	1.22426	0.220855	0.771921	USP38	No	No	No
ENSG00000152270	7486	0.0882512	0.0721279	1.22354	0.221127	0.771921	PDE3B	No	No	No
ENSG00000141560	1562.92	-0.164663	0.134581	-1.22353	0.22113	0.771921	FN3KRP	No	No	No
ENSG00000077721	2046.71	-0.0351497	0.0287284	-1.22352	0.221135	0.771921	UBE2A	No	No	No
ENSG00000100359	1827.08	-0.0519792	0.0424956	-1.22317	0.221267	0.771921	SGSM3	No	No	No
ENSG00000164022	3124.64	0.0562626	0.0459975	1.22317	0.221267	0.771921	AIMP1	No	No	No
ENSG00000023330	1403.16	-0.0441076	0.0360785	-1.22255	0.221501	0.771948	ALAS1	No	No	No
ENSG00000270188	2114.42	-0.16187	0.132448	-1.22214	0.221653	0.771948	MTRNR2L11	No	No	No
ENSG00000135387	7234.89	0.0416226	0.0340601	1.22204	0.221694	0.771948	CAPRIN1	No	No	No
ENSG00000163512	1803.27	0.0642978	0.0526849	1.22042	0.222305	0.773346	AZI2	No	No	No
ENSG00000213639	10267	0.0497522	0.0407821	1.21995	0.222483	0.773346	PPP1CB	No	No	No
ENSG00000131174	3172.52	-0.038722	0.0317428	-1.21987	0.222515	0.773346	COX7B	No	No	No
ENSG00000137414	1923.12	0.051245	0.0420562	1.21849	0.223038	0.774148	FAM8A1	No	No	No
ENSG00000137075	4340.64	0.0455169	0.0373673	1.21809	0.223189	0.774148	RNF38	No	No	No
ENSG00000138071	35301.5	0.0416223	0.0341787	1.21778	0.223306	0.774148	ACTR2	No	No	No
ENSG00000251369	1404.23	0.0729584	0.0599108	1.21778	0.223307	0.774148	ZNF550	No	No	No
ENSG00000164933	1391.74	-0.0398497	0.032738	-1.21723	0.223517	0.774326	SLC25A32	No	No	No
ENSG00000116260	1968.91	-0.0424915	0.0349175	-1.21691	0.223638	0.774326	QSOX1	No	No	No
ENSG00000138600	1406.09	0.0692606	0.0569525	1.21611	0.223942	0.774893	SPPL2A	No	No	No
ENSG00000151835	1729.05	0.0700705	0.0576466	1.21552	0.224169	0.775191	SACS	No	No	No
ENSG00000106948	20945.7	-0.0543603	0.044766	-1.21432	0.224625	0.776283	AKNA	No	No	No
ENSG00000174021	2402.85	-0.0511104	0.0421028	-1.21394	0.22477	0.7763	GNG5	No	No	No
ENSG00000277791	3275.07	-0.0498866	0.0411508	-1.21229	0.225403	0.777998	PSMB3	No	No	No
ENSG00000198830	20515.2	-0.0553312	0.0456965	-1.21084	0.225956	0.778639	HMGN2	No	No	No
ENSG00000185989	9152	0.0604145	0.0499005	1.2107	0.226011	0.778639	RASA3	No	No	No
ENSG00000280477	9152	0.0604145	0.0499005	1.2107	0.226011	0.778639	RASA3	No	No	No
ENSG00000205542	288256	-0.0377028	0.03116	-1.20997	0.226289	0.779111	TMSB4X	No	No	No
ENSG00000164574	2466.98	-0.0675364	0.055856	-1.20912	0.226618	0.77952	GALNT10	No	No	No
ENSG00000107099	10755.1	0.0575895	0.0476368	1.20893	0.22669	0.77952	DOCK8	No	No	No
ENSG00000239697	3018.02	-0.0708509	0.0586389	-1.20826	0.226948	0.779625	TNFSF12	No	No	No
ENSG00000086758	8337.79	0.0498537	0.0412656	1.20812	0.227003	0.779625	HUWE1	No	No	No
ENSG00000185164	4340.52	0.0835092	0.0691455	1.20773	0.227151	0.779649	NOMO2	No	No	No
ENSG00000197756	100542	-0.0451538	0.0374052	-1.20715	0.227373	0.77984	RPL37A	No	No	No
ENSG00000136628	7787.04	0.0412716	0.0342236	1.20594	0.227841	0.77984	EPRS	No	No	No
ENSG00000112365	1803.54	0.0473011	0.0392247	1.2059	0.227855	0.77984	ZBTB24	No	No	No
ENSG00000141480	8467.2	-0.0492414	0.0408642	-1.205	0.228203	0.77984	ARRB2	No	No	No
ENSG00000197860	2431.91	0.0726266	0.0602765	1.20489	0.228246	0.77984	SGTB	No	No	No
ENSG00000166579	2788.73	0.0313905	0.0260684	1.20416	0.228527	0.77984	NDEL1	No	No	No
ENSG00000078061	3428.61	-0.0460269	0.0382464	-1.20343	0.228809	0.77984	ARAF	No	No	No
ENSG00000072501	6998.36	0.0524991	0.0436399	1.20301	0.228974	0.77984	SMC1A	No	No	No
ENSG00000186854	6963.26	0.0758238	0.0630338	1.20291	0.229012	0.77984	TRABD2A	No	No	No
ENSG00000006007	2158.93	-0.0374067	0.0311124	-1.20231	0.229244	0.77984	GDE1	No	No	No
ENSG00000166986	2886.44	-0.0438114	0.0364644	-1.20148	0.229564	0.77984	MARS	No	No	No
ENSG00000164031	2944.83	0.0607151	0.0505337	1.20148	0.229566	0.77984	DNAJB14	No	No	No
ENSG00000102900	1837.8	-0.0408932	0.0340548	-1.20081	0.229826	0.77984	NUP93	No	No	No
ENSG00000234704	4229.86	0.539768	0.44977	1.2001	0.230101	0.77984	BRD2	No	No	No
ENSG00000130382	2149.54	-0.0461429	0.0384537	-1.19996	0.230154	0.77984	MLLT1	No	No	No
ENSG00000134248	2327.17	-0.0348202	0.0290587	-1.19827	0.230812	0.77984	LAMTOR5	No	No	No
ENSG00000160695	1487.67	0.0420519	0.0351003	1.19805	0.230897	0.77984	VPS11	No	No	No
ENSG00000280616	1487.67	0.0420519	0.0351003	1.19805	0.230897	0.77984	VPS11	No	No	No
ENSG00000161016	156766	0.0599265	0.0500373	1.19764	0.231059	0.77984	RPL8	No	No	No
ENSG00000139514	2015.25	-0.0514475	0.0429938	-1.19663	0.231452	0.77984	SLC7A1	No	No	No
ENSG00000176986	4568.68	-0.0504135	0.042143	-1.19625	0.2316	0.77984	SEC24C	No	No	No
ENSG00000102978	4281.98	0.0342205	0.0286113	1.19605	0.231677	0.77984	POLR2C	No	No	No
ENSG00000175727	2108.81	-0.0587062	0.0491312	-1.19489	0.232131	0.77984	MLXIP	No	No	No
ENSG00000281178	2108.81	-0.0587062	0.0491312	-1.19489	0.232131	0.77984	MLXIP	No	No	No
ENSG00000198887	3630.63	0.0425564	0.0356413	1.19402	0.232471	0.77984	SMC5	No	No	No
ENSG00000103202	1444.52	0.0941038	0.0788227	1.19387	0.23253	0.77984	NME4	No	No	No
ENSG00000118007	2662.23	0.0417885	0.0350034	1.19384	0.23254	0.77984	STAG1	No	No	No
ENSG00000094975	1915.03	0.051148	0.0428588	1.19341	0.23271	0.77984	SUCO	No	No	No
ENSG00000160803	2185.88	-0.0597545	0.0500727	-1.19336	0.23273	0.77984	UBQLN4	No	No	No
ENSG00000215251	1679.46	-0.0613294	0.0514155	-1.19282	0.23294	0.77984	FASTKD5	No	No	No
ENSG00000102786	2944.33	0.0480319	0.0403084	1.19161	0.233415	0.77984	INTS6	No	No	No
ENSG00000141644	3190.85	-0.0304938	0.0255912	-1.19158	0.233427	0.77984	MBD1	No	No	No
ENSG00000168090	3122.23	-0.036777	0.0308658	-1.19151	0.233453	0.77984	COPS6	No	No	No
ENSG00000211592	7855.99	0.22166	0.186046	1.19143	0.233486	0.77984	IGKC	No	No	No
ENSG00000160633	7865.46	0.0403444	0.0338773	1.1909	0.233694	0.77984	SAFB	No	No	No
ENSG00000135334	2210.42	-0.0434973	0.0365377	-1.19048	0.23386	0.77984	AKIRIN2	No	No	No
ENSG00000078140	4014.65	0.0370683	0.0311406	1.19035	0.233908	0.77984	UBE2K	No	No	No
ENSG00000167470	1697.69	-0.0779551	0.0655156	-1.18987	0.234098	0.77984	MIDN	No	No	No
ENSG00000131196	3426.46	-0.0615286	0.0517299	-1.18942	0.234274	0.77984	NFATC1	No	No	No
ENSG00000117054	2483.33	0.0534815	0.0449722	1.18921	0.234356	0.77984	ACADM	No	No	No
ENSG00000146904	1628.68	0.107668	0.0905577	1.18894	0.234463	0.77984	EPHA1	No	No	No
ENSG00000243147	1834.69	-0.0337256	0.0283732	-1.18864	0.234581	0.77984	MRPL33	No	No	No
ENSG00000189091	7328.48	0.0389503	0.0327748	1.18842	0.234667	0.77984	SF3B3	No	No	No
ENSG00000108961	1747.56	-0.0460559	0.0387574	-1.18831	0.23471	0.77984	RANGRF	No	No	No
ENSG00000143183	3998.6	-0.0434731	0.0365885	-1.18816	0.23477	0.77984	TMCO1	No	No	No
ENSG00000071894	2864.11	-0.0464848	0.0391321	-1.18789	0.234876	0.77984	CPSF1	No	No	No
ENSG00000121481	1787.52	0.0438069	0.0368821	1.18776	0.234929	0.77984	RNF2	No	No	No
ENSG00000009954	5968.33	0.0359367	0.0302719	1.18713	0.235175	0.77984	BAZ1B	No	No	No
ENSG00000204487	5959.37	-0.0613478	0.051679	-1.18709	0.23519	0.77984	LTB	No	No	No
ENSG00000206437	5959.37	-0.0613478	0.051679	-1.18709	0.23519	0.77984	LTB	No	No	No
ENSG00000223448	5959.37	-0.0613478	0.051679	-1.18709	0.23519	0.77984	LTB	No	No	No
ENSG00000231314	5959.37	-0.0613478	0.051679	-1.18709	0.23519	0.77984	LTB	No	No	No
ENSG00000236237	5959.37	-0.0613478	0.051679	-1.18709	0.23519	0.77984	LTB	No	No	No
ENSG00000236925	5959.37	-0.0613478	0.051679	-1.18709	0.23519	0.77984	LTB	No	No	No
ENSG00000238114	5959.37	-0.0613478	0.051679	-1.18709	0.23519	0.77984	LTB	No	No	No
ENSG00000214655	1942.74	-0.0499419	0.0420753	-1.18696	0.235242	0.77984	ZSWIM8	No	No	No
ENSG00000172794	3837.43	-0.074641	0.0628888	-1.18687	0.235278	0.77984	RAB37	No	No	No
ENSG00000104904	33176.8	-0.0395064	0.0332942	-1.18658	0.235392	0.77984	OAZ1	No	No	No
ENSG00000156052	2795.11	0.0694343	0.0585399	1.1861	0.235582	0.780005	GNAQ	No	No	No
ENSG00000090006	1831.15	-0.0744608	0.0628351	-1.18502	0.23601	0.780954	LTBP4	No	No	No
ENSG00000139505	2752.66	0.0532511	0.0449772	1.18396	0.23643	0.781432	MTMR6	No	No	No
ENSG00000129245	1402.06	-0.0410497	0.0346848	-1.18351	0.236609	0.781432	FXR2	No	No	No
ENSG00000056097	4773.37	0.0423974	0.0358351	1.18313	0.236759	0.781432	ZFR	No	No	No
ENSG00000103479	19248.6	0.0601396	0.0508352	1.18303	0.236797	0.781432	RBL2	No	No	No
ENSG00000221983	74380	-0.0337081	0.028497	-1.18287	0.236862	0.781432	UBA52	No	No	No
ENSG00000055044	4422.7	0.0383803	0.0324621	1.18231	0.237082	0.781692	NOP58	No	No	No
ENSG00000100354	2623.38	0.0615825	0.0521135	1.1817	0.237324	0.782024	TNRC6B	No	No	No
ENSG00000008128	1377.13	-0.161761	0.136963	-1.18106	0.23758	0.782077	CDK11A	No	No	No
ENSG00000175792	2794.91	-0.0346701	0.0293579	-1.18095	0.237624	0.782077	RUVBL1	No	No	No
ENSG00000088205	8191.01	0.0354979	0.0300796	1.18013	0.237947	0.782464	DDX18	No	No	No
ENSG00000130638	3915.81	-0.0292443	0.0247854	-1.1799	0.23804	0.782464	ATXN10	No	No	No
ENSG00000182774	9346.23	-0.0889859	0.0754384	-1.17958	0.238166	0.782464	RPS17	No	No	No
ENSG00000143870	7057.6	-0.0654722	0.0555367	-1.1789	0.238438	0.782893	PDIA6	No	No	No
ENSG00000163938	3202.55	0.0450307	0.038216	1.17832	0.238669	0.783185	GNL3	No	No	No
ENSG00000118689	1806.67	0.0569989	0.0484838	1.17563	0.239744	0.784898	FOXO3	No	No	No
ENSG00000197386	3398.57	0.0465366	0.0395912	1.17543	0.239823	0.784898	HTT	No	No	No
ENSG00000163931	8364.78	0.058279	0.0495923	1.17516	0.239929	0.784898	TKT	No	No	No
ENSG00000180011	2267.4	-0.0896671	0.0763099	-1.17504	0.239979	0.784898	ZADH2	No	No	No
ENSG00000058729	1415.25	0.0562607	0.0479065	1.17439	0.240241	0.784898	RIOK2	No	No	No
ENSG00000177030	1907.42	-0.0690883	0.0588346	-1.17428	0.240283	0.784898	DEAF1	No	No	No
ENSG00000042753	2135.84	-0.0417092	0.0355211	-1.17421	0.240312	0.784898	AP2S1	No	No	No
ENSG00000100351	7534.87	-0.0827104	0.0704416	-1.17417	0.240327	0.784898	GRAP2	No	No	No
ENSG00000161202	1499.37	-0.0404133	0.0344438	-1.17331	0.240671	0.785041	DVL3	No	No	No
ENSG00000143753	3432.01	-0.0692112	0.0590076	-1.17292	0.240828	0.785041	DEGS1	No	No	No
ENSG00000149792	3962.74	0.0340767	0.0290576	1.17273	0.240905	0.785041	MRPL49	No	No	No
ENSG00000169592	1872.4	-0.0649073	0.0553621	-1.17242	0.24103	0.785041	INO80E	No	No	No
ENSG00000112701	4719.31	0.0444577	0.0379239	1.17229	0.241081	0.785041	SENP6	No	No	No
ENSG00000182117	2545.69	-0.0412874	0.0352496	-1.17129	0.241484	0.785686	NOP10	No	No	No
ENSG00000147654	1702.38	0.0446419	0.0381269	1.17088	0.241648	0.785686	EBAG9	No	No	No
ENSG00000184047	1714.86	-0.0289172	0.0247181	-1.16988	0.24205	0.785686	DIABLO	No	No	No
ENSG00000119801	6618.97	0.0348895	0.0298655	1.16822	0.242717	0.785686	YPEL5	No	No	No
ENSG00000145191	2469.32	0.0366309	0.0313654	1.16788	0.242857	0.785686	EIF2B5	No	No	No
ENSG00000100325	2743.76	-0.0436061	0.0373604	-1.16717	0.24314	0.785686	ASCC2	No	No	No
ENSG00000164134	2311.96	0.0570848	0.0489241	1.1668	0.243289	0.785686	NAA15	No	No	No
ENSG00000091140	2498.19	0.0370954	0.0317999	1.16653	0.243401	0.785686	DLD	No	No	No
ENSG00000179820	3492.16	-0.100512	0.086208	-1.16592	0.243646	0.785686	MYADM	No	No	No
ENSG00000197771	4745.36	0.0353113	0.0302879	1.16586	0.243673	0.785686	MCMBP	No	No	No
ENSG00000120733	4082.05	0.0368474	0.0316284	1.16501	0.244015	0.785686	KDM3B	No	No	No
ENSG00000115286	2184.46	-0.0465096	0.0399258	-1.1649	0.244059	0.785686	NDUFS7	No	No	No
ENSG00000226618	1872.87	-0.801468	0.688217	-1.16456	0.244198	0.785686	PRRC2A	No	No	No
ENSG00000197451	4091.25	-0.0340283	0.029222	-1.16447	0.244232	0.785686	HNRNPAB	No	No	No
ENSG00000142864	17041.8	0.0338304	0.0290541	1.16439	0.244265	0.785686	SERBP1	No	No	No
ENSG00000163399	32813.1	0.0388677	0.0333805	1.16439	0.244268	0.785686	ATP1A1	No	No	No
ENSG00000164258	1552.11	-0.0524675	0.0450742	-1.16402	0.244414	0.785686	NDUFS4	No	No	No
ENSG00000177239	2599.02	0.038505	0.0330873	1.16374	0.244529	0.785686	MAN1B1	No	No	No
ENSG00000166913	27786.3	-0.0287014	0.0246669	-1.16356	0.244603	0.785686	YWHAB	No	No	No
ENSG00000151176	1659.06	-0.0539964	0.0464069	-1.16354	0.244609	0.785686	PLBD2	No	No	No
ENSG00000111726	1472.49	-0.0333571	0.0286703	-1.16347	0.244638	0.785686	CMAS	No	No	No
ENSG00000165637	4964.34	-0.0386735	0.0332442	-1.16332	0.244701	0.785686	VDAC2	No	No	No
ENSG00000105374	5033.55	-0.259702	0.223309	-1.16297	0.244841	0.785686	NKG7	No	No	No
ENSG00000143106	5902.55	-0.0487553	0.0419231	-1.16297	0.244842	0.785686	PSMA5	No	No	No
ENSG00000111670	4192.91	0.047716	0.0410392	1.16269	0.244954	0.785686	GNPTAB	No	No	No
ENSG00000123353	1477.27	-0.040534	0.0348669	-1.16254	0.245017	0.785686	ORMDL2	No	No	No
ENSG00000100575	1487.4	0.0489538	0.0421216	1.1622	0.245154	0.785686	TIMM9	No	No	No
ENSG00000141027	6080.11	0.0502053	0.0432127	1.16182	0.245309	0.785686	NCOR1	No	No	No
ENSG00000154930	3005.2	-0.0325229	0.0279986	-1.16159	0.245402	0.785686	ACSS1	No	No	No
ENSG00000100241	8165.01	-0.0491011	0.0422986	-1.16082	0.245715	0.786003	SBF1	No	No	No
ENSG00000173141	1902.38	-0.0337315	0.0290657	-1.16053	0.245835	0.786003	MRPL57	No	No	No
ENSG00000138430	3885.79	0.0451199	0.0388999	1.1599	0.246091	0.786003	OLA1	No	No	No
ENSG00000115310	7242.4	-0.0431688	0.0372263	-1.15963	0.246198	0.786003	RTN4	No	No	No
ENSG00000188725	1885.19	-0.0586021	0.0505366	-1.1596	0.246213	0.786003	SMIM15	No	No	No
ENSG00000187109	48247.3	0.0490696	0.0423373	1.15901	0.24645	0.786208	NAP1L1	No	No	No
ENSG00000116857	1600.96	0.0434045	0.0374594	1.15871	0.246575	0.786208	TMEM9	No	No	No
ENSG00000211899	1553.09	0.270926	0.233908	1.15826	0.246759	0.786208	IGHM	No	No	No
ENSG00000216490	3072.57	0.207324	0.179064	1.15782	0.246937	0.786208	IFI30	No	No	No
ENSG00000165416	1965.67	-0.0388514	0.0335629	-1.15757	0.24704	0.786208	SUGT1	No	No	No
ENSG00000120896	3137.89	-0.092136	0.0796106	-1.15733	0.247136	0.786208	SORBS3	No	No	No
ENSG00000100934	3044.04	0.03138	0.0271448	1.15602	0.247672	0.786208	SEC23A	No	No	No
ENSG00000120805	2223.7	0.032989	0.0285411	1.15584	0.247746	0.786208	ARL1	No	No	No
ENSG00000198286	7920.61	-0.0492782	0.0426351	-1.15581	0.247758	0.786208	CARD11	No	No	No
ENSG00000127663	1635.26	0.0659468	0.0570567	1.15581	0.247758	0.786208	KDM4B	No	No	No
ENSG00000041802	1806.52	0.0622355	0.0538693	1.15531	0.247965	0.786208	LSG1	No	No	No
ENSG00000105185	1876.57	-0.051029	0.0441764	-1.15512	0.248042	0.786208	PDCD5	No	No	No
ENSG00000135829	10561.1	0.047829	0.0414135	1.15491	0.248126	0.786208	DHX9	No	No	No
ENSG00000144579	8775.68	-0.0386246	0.0335004	-1.15296	0.248926	0.788291	CTDSP1	No	No	No
ENSG00000150403	1450.03	0.0455101	0.0395065	1.15197	0.249335	0.788373	TMCO3	No	No	No
ENSG00000160294	3689.98	0.0508791	0.0441745	1.15178	0.249413	0.788373	MCM3AP	No	No	No
ENSG00000149136	7283.23	-0.0326338	0.0283339	-1.15176	0.24942	0.788373	SSRP1	No	No	No
ENSG00000198087	2430.92	0.0521527	0.0453159	1.15087	0.249787	0.788373	CD2AP	No	No	No
ENSG00000197858	2215.41	0.0395017	0.0343237	1.15086	0.24979	0.788373	GPAA1	No	No	No
ENSG00000257727	2559.94	-0.0399363	0.0347026	-1.15082	0.249808	0.788373	CNPY2	No	No	No
ENSG00000186716	5941.38	-0.0587428	0.051069	-1.15027	0.250035	0.788409	BCR	No	No	No
ENSG00000231370	2637.2	-0.782249	0.680585	-1.14938	0.2504	0.788409	PRRC2A	No	No	No
ENSG00000108312	11006.2	-0.0254521	0.0221517	-1.14899	0.250559	0.788409	UBTF	No	No	No
ENSG00000165512	2903.7	0.0462666	0.0402709	1.14889	0.250603	0.788409	ZNF22	No	No	No
ENSG00000091157	1768.7	0.0441985	0.0384795	1.14863	0.25071	0.788409	WDR7	No	No	No
ENSG00000282812	5214.09	-0.0836802	0.0728929	-1.14799	0.250973	0.788409	TRBV28	No	No	No
ENSG00000101166	4235.19	0.0494623	0.0430954	1.14774	0.251077	0.788409	PRELID3B	No	No	No
ENSG00000088298	1490.96	-0.0479831	0.0418091	-1.14767	0.251104	0.788409	EDEM2	No	No	No
ENSG00000025800	1955.51	0.0689631	0.0601169	1.14715	0.251319	0.788409	KPNA6	No	No	No
ENSG00000164040	3482.55	-0.0379742	0.0331169	-1.14667	0.251517	0.788409	PGRMC2	No	No	No
ENSG00000174238	3593.68	-0.0316962	0.0276519	-1.14626	0.251689	0.788409	PITPNA	No	No	No
ENSG00000169738	2384.18	-0.0594031	0.0518445	-1.14579	0.251881	0.788409	DCXR	No	No	No
ENSG00000135926	9007.29	0.0429119	0.0374567	1.14564	0.251945	0.788409	TMBIM1	No	No	No
ENSG00000175567	22709.9	-0.0877994	0.0766516	-1.14543	0.252029	0.788409	UCP2	No	No	No
ENSG00000198646	2684.35	-0.0508325	0.0443933	-1.14505	0.252188	0.788409	NCOA6	No	No	No
ENSG00000109689	2585.86	0.0366409	0.0320026	1.14494	0.252236	0.788409	STIM2	No	No	No
ENSG00000160410	5144.77	-0.0390324	0.0340985	-1.14469	0.252336	0.788409	SHKBP1	No	No	No
ENSG00000136709	4241.16	0.0303923	0.0265713	1.1438	0.252705	0.788409	WDR33	No	No	No
ENSG00000077420	8228.34	-0.0428253	0.0374565	-1.14333	0.2529	0.788409	APBB1IP	No	No	No
ENSG00000121864	2604.71	0.0496289	0.0434094	1.14328	0.252924	0.788409	ZNF639	No	No	No
ENSG00000067829	2514.87	-0.0483248	0.042269	-1.14327	0.252927	0.788409	IDH3G	No	No	No
ENSG00000117133	2869.78	0.0320367	0.0280315	1.14288	0.253088	0.788409	RPF1	No	No	No
ENSG00000143970	3451.91	0.0561828	0.0491629	1.14279	0.253126	0.788409	ASXL2	No	No	No
ENSG00000214736	5864.63	-0.0389933	0.0341296	-1.14251	0.253244	0.788409	TOMM6	No	No	No
ENSG00000120948	5162.68	-0.0571165	0.0500159	-1.14197	0.253468	0.788661	TARDBP	No	No	No
ENSG00000198925	1482.79	-0.049927	0.0437496	-1.1412	0.253787	0.789211	ATG9A	No	No	No
ENSG00000130787	1439.58	0.0524415	0.0459774	1.14059	0.254039	0.78955	HIP1R	No	No	No
ENSG00000189283	2129.61	0.100676	0.0883538	1.13946	0.254511	0.790573	FHIT	No	No	No
ENSG00000113719	4479.6	-0.0332273	0.0291902	-1.1383	0.254994	0.791363	ERGIC1	No	No	No
ENSG00000137776	4070.32	0.0464271	0.0407912	1.13816	0.255052	0.791363	SLTM	No	No	No
ENSG00000169926	11340.7	0.394559	0.346828	1.13762	0.255279	0.791622	KLF13	No	No	No
ENSG00000213658	12646.5	-0.0498624	0.0438579	-1.13691	0.255577	0.792098	LAT	No	No	No
ENSG00000170515	8664.34	0.0330363	0.0290667	1.13657	0.255719	0.792098	PA2G4	No	No	No
ENSG00000134086	2104.55	-0.0669776	0.0589613	-1.13596	0.255973	0.792441	VHL	No	No	No
ENSG00000170296	10963	-0.0379735	0.0334482	-1.13529	0.256252	0.792793	GABARAP	No	No	No
ENSG00000204387	2936.69	0.0566814	0.0499532	1.13469	0.256505	0.792793	C6orf48	No	No	No
ENSG00000168906	4042.37	-0.0448947	0.0395679	-1.13462	0.256533	0.792793	MAT2A	No	No	No
ENSG00000082212	3329.53	0.033316	0.0293726	1.13426	0.256687	0.792793	ME2	No	No	No
ENSG00000147457	11252.7	0.0885776	0.0781209	1.13385	0.256856	0.792793	CHMP7	No	No	No
ENSG00000115816	3256.65	0.0619668	0.054662	1.13364	0.256947	0.792793	CEBPZ	No	No	No
ENSG00000100890	3522.24	0.0407537	0.0359699	1.13299	0.257217	0.792914	KIAA0391	No	No	No
ENSG00000203896	10128.9	0.0509867	0.0450071	1.13286	0.257274	0.792914	LIME1	No	No	No
ENSG00000188986	3713.03	-0.0300659	0.0265981	-1.13038	0.258318	0.794706	NELFB	No	No	No
ENSG00000007202	6783.95	0.031639	0.0279962	1.13012	0.258428	0.794706	KIAA0100	No	No	No
ENSG00000100346	1476.3	0.122527	0.10843	1.13002	0.258469	0.794706	CACNA1I	No	No	No
ENSG00000067704	6197.68	0.0487724	0.0431629	1.12996	0.258492	0.794706	IARS2	No	No	No
ENSG00000106952	3334.15	0.124365	0.11008	1.12977	0.258574	0.794706	TNFSF8	No	No	No
ENSG00000170871	1664.65	0.0488366	0.0432616	1.12887	0.258954	0.795242	KIAA0232	No	No	No
ENSG00000068024	1600.58	0.0680759	0.060315	1.12867	0.259036	0.795242	HDAC4	No	No	No
ENSG00000135486	102092	0.0435222	0.0385893	1.12783	0.259392	0.795892	HNRNPA1	No	No	No
ENSG00000262246	5143.88	-0.0611709	0.0542543	-1.12748	0.259538	0.795896	CORO7	No	No	No
ENSG00000068323	1618.52	-0.0460467	0.0408953	-1.12597	0.26018	0.797333	TFE3	No	No	No
ENSG00000123444	1644.45	-0.0397208	0.0353034	-1.12513	0.260535	0.797333	KBTBD4	No	No	No
ENSG00000184743	2797.11	0.074867	0.0665779	1.1245	0.2608	0.797333	ATL3	No	No	No
ENSG00000135048	3392.38	0.0881574	0.0784049	1.12439	0.260849	0.797333	TMEM2	No	No	No
ENSG00000141959	6826.69	0.039312	0.0349905	1.1235	0.261224	0.797333	PFKL	No	No	No
ENSG00000101752	2440.62	0.0559704	0.0498311	1.1232	0.261351	0.797333	MIB1	No	No	No
ENSG00000163950	2980.97	-0.0302746	0.0269574	-1.12305	0.261415	0.797333	SLBP	No	No	No
ENSG00000086232	7694.44	-0.0508739	0.0453025	-1.12298	0.261445	0.797333	EIF2AK1	No	No	No
ENSG00000110934	2106.13	0.0927192	0.0825735	1.12287	0.261493	0.797333	BIN2	No	No	No
ENSG00000142634	6235.2	-0.0737018	0.0656498	-1.12265	0.261586	0.797333	EFHD2	No	No	No
ENSG00000132294	4665.36	0.0649621	0.0578658	1.12263	0.261593	0.797333	EFR3A	No	No	No
ENSG00000156639	3157.91	-0.0342211	0.0305278	-1.12098	0.262295	0.798845	ZFAND3	No	No	No
ENSG00000106608	1628.93	0.0454289	0.0405529	1.12024	0.262612	0.798845	URGCP	No	No	No
ENSG00000113384	6277.37	0.0234167	0.0209199	1.11935	0.262991	0.798845	GOLPH3	No	No	No
ENSG00000156471	7256.42	0.0332193	0.0296786	1.1193	0.263012	0.798845	PTDSS1	No	No	No
ENSG00000162298	1725.06	-0.0487245	0.0435394	-1.11909	0.263102	0.798845	SYVN1	No	No	No
ENSG00000131143	23427.3	0.0396142	0.0354198	1.11842	0.263388	0.798845	COX4I1	No	No	No
ENSG00000115165	11382.4	0.0566332	0.0506553	1.11801	0.263562	0.798845	CYTIP	No	No	No
ENSG00000136997	14629.1	0.0682568	0.0610679	1.11772	0.263687	0.798845	MYC	No	No	No
ENSG00000188612	12726.4	0.031584	0.0282619	1.11755	0.263761	0.798845	SUMO2	No	No	No
ENSG00000100994	3510.06	0.0616155	0.0551709	1.11681	0.264075	0.798845	PYGB	No	No	No
ENSG00000184730	2931.18	-0.119095	0.106653	-1.11666	0.26414	0.798845	APOBR	No	No	No
ENSG00000135632	1391.82	0.0400913	0.0359208	1.1161	0.264378	0.798845	SMYD5	No	No	No
ENSG00000102401	1594.53	-0.0535451	0.0479771	-1.11606	0.264399	0.798845	ARMCX3	No	No	No
ENSG00000154978	8962.46	0.0446879	0.0400475	1.11587	0.264477	0.798845	VOPP1	No	No	No
ENSG00000160654	10762	0.0326537	0.0292723	1.11552	0.26463	0.798845	CD3G	No	No	No
ENSG00000011600	1937.06	0.171696	0.153963	1.11518	0.264773	0.798845	TYROBP	No	No	No
ENSG00000073050	1918.93	-0.038816	0.0348184	-1.11481	0.26493	0.798845	XRCC1	No	No	No
ENSG00000118816	26583.5	0.0523612	0.0469767	1.11462	0.265013	0.798845	CCNI	No	No	No
ENSG00000004700	4307.09	-0.0360537	0.032358	-1.11421	0.265188	0.798845	RECQL	No	No	No
ENSG00000131401	1446.2	0.224771	0.201754	1.11408	0.265244	0.798845	NAPSB	No	No	No
ENSG00000151150	1632.24	-0.0802041	0.0719915	-1.11408	0.265246	0.798845	ANK3	No	No	No
ENSG00000137492	8428.77	0.0394204	0.0353934	1.11378	0.265374	0.798845	THAP12	No	No	No
ENSG00000131374	2736.37	0.0450417	0.0404707	1.11295	0.265732	0.798845	TBC1D5	No	No	No
ENSG00000079616	2042.08	-0.0453344	0.0407369	-1.11286	0.265769	0.798845	KIF22	No	No	No
ENSG00000134452	3411.01	0.0299159	0.026906	1.11187	0.266195	0.798845	FBXO18	No	No	No
ENSG00000112078	4723.4	0.0467691	0.0420692	1.11172	0.26626	0.798845	KCTD20	No	No	No
ENSG00000013561	1534.81	-0.0397382	0.0357479	-1.11162	0.266301	0.798845	RNF14	No	No	No
ENSG00000120265	3662.39	-0.023195	0.0208762	-1.11108	0.266535	0.798845	PCMT1	No	No	No
ENSG00000274110	1733.3	0.395588	0.356111	1.11086	0.26663	0.798845	LAIR1	No	No	No
ENSG00000152778	1416.99	0.119148	0.107276	1.11067	0.266709	0.798845	IFIT5	No	No	No
ENSG00000183255	4378.38	-0.0501443	0.0451569	-1.11045	0.266807	0.798845	PTTG1IP	No	No	No
ENSG00000159884	1487.09	-0.0591065	0.053246	-1.11007	0.266971	0.798845	CCDC107	No	No	No
ENSG00000171863	106243	0.0511014	0.0460687	1.10924	0.267325	0.798845	RPS7	No	No	No
ENSG00000134748	4181.37	0.0344028	0.0310163	1.10919	0.26735	0.798845	PRPF38A	No	No	No
ENSG00000135457	2936.01	-0.0309015	0.0278649	-1.10898	0.26744	0.798845	TFCP2	No	No	No
ENSG00000273936	3728.25	0.0569797	0.0513918	1.10873	0.267546	0.798845	TNFRSF14	No	No	No
ENSG00000063601	2832.38	0.0361502	0.0326057	1.10871	0.267556	0.798845	MTMR1	No	No	No
ENSG00000147408	4168.66	-0.0937544	0.0845666	-1.10865	0.267583	0.798845	CSGALNACT1	No	No	No
ENSG00000143167	2382.99	0.112578	0.101613	1.10791	0.2679	0.798961	GPA33	No	No	No
ENSG00000106829	2865.94	-0.0469006	0.0423334	-1.10789	0.267911	0.798961	TLE4	No	No	No
ENSG00000185624	15886.9	-0.0345751	0.0312393	-1.10678	0.268388	0.799953	P4HB	No	No	No
ENSG00000198771	14061.9	0.0563551	0.0509601	1.10587	0.268784	0.8007	RCSD1	No	No	No
ENSG00000115977	4572.51	0.0441043	0.0399242	1.1047	0.269289	0.800723	AAK1	No	No	No
ENSG00000010244	6727.02	0.0380597	0.0344849	1.10366	0.269739	0.800723	ZNF207	No	No	No
ENSG00000206380	2943.01	0.0552617	0.0500787	1.1035	0.269812	0.800723	C6orf48	No	No	No
ENSG00000234728	2943.01	0.0552617	0.0500787	1.1035	0.269812	0.800723	C6orf48	No	No	No
ENSG00000080845	2177.95	-0.0454125	0.0411603	-1.10331	0.269893	0.800723	DLGAP4	No	No	No
ENSG00000168763	1597.84	-0.0457318	0.0414554	-1.10316	0.269959	0.800723	CNNM3	No	No	No
ENSG00000198899	215328	0.0852647	0.0772979	1.10307	0.269998	0.800723	MT-ATP6	No	No	No
ENSG00000172053	8294.4	0.044199	0.0400759	1.10288	0.270078	0.800723	QARS	No	No	No
ENSG00000173889	3703.01	0.0481815	0.0437002	1.10255	0.270225	0.800723	PHC3	No	No	No
ENSG00000090857	2796.26	-0.108629	0.0985612	-1.10215	0.270398	0.800723	PDPR	No	No	No
ENSG00000107485	4942.57	-0.0766821	0.0695973	-1.1018	0.27055	0.800723	GATA3	No	No	No
ENSG00000136261	2356.48	0.0486727	0.0441983	1.10123	0.270795	0.800723	BZW2	No	No	No
ENSG00000280071	3289.85	-0.233784	0.212309	-1.10115	0.270833	0.800723	FP565260.6	No	No	No
ENSG00000176396	1820.83	-0.0475758	0.0432215	-1.10074	0.271008	0.800723	EID2	No	No	No
ENSG00000135269	10420	0.0397224	0.0360897	1.10066	0.271046	0.800723	TES	No	No	No
ENSG00000165526	1496.98	0.0523086	0.0475339	1.10045	0.271136	0.800723	RPUSD4	No	No	No
ENSG00000064115	2130.84	-0.0451617	0.0410728	-1.09955	0.271527	0.800723	TM7SF3	No	No	No
ENSG00000109046	2910.66	0.0477551	0.0434378	1.09939	0.271598	0.800723	WSB1	No	No	No
ENSG00000138279	7473.5	-0.0194674	0.0177141	-1.09898	0.271776	0.800723	ANXA7	No	No	No
ENSG00000063322	3443.9	0.0305221	0.0277843	1.09854	0.271969	0.800723	MED29	No	No	No
ENSG00000198176	3761.29	0.0489245	0.0445443	1.09833	0.272059	0.800723	TFDP1	No	No	No
ENSG00000109670	1494.53	-0.0400726	0.0365328	-1.09689	0.272689	0.800723	FBXW7	No	No	No
ENSG00000160408	3075.86	-0.0569414	0.0519118	-1.09689	0.27269	0.800723	ST6GALNAC6	No	No	No
ENSG00000099800	1616.55	0.0589023	0.053704	1.09679	0.272731	0.800723	TIMM13	No	No	No
ENSG00000133265	1394.6	-0.0407563	0.0371677	-1.09655	0.272838	0.800723	HSPBP1	No	No	No
ENSG00000196642	3801.88	-0.0326849	0.0298084	-1.0965	0.272861	0.800723	RABL6	No	No	No
ENSG00000173598	5308.46	0.0446167	0.0407039	1.09613	0.273023	0.800723	NUDT4	No	No	No
ENSG00000157450	1622.09	0.0437206	0.0398886	1.09607	0.27305	0.800723	RNF111	No	No	No
ENSG00000093183	2349.29	0.0355369	0.0324235	1.09602	0.273068	0.800723	SEC22C	No	No	No
ENSG00000015475	1649.01	0.0537887	0.0491064	1.09535	0.273363	0.800723	BID	No	No	No
ENSG00000157873	3721.4	0.0567505	0.0518198	1.09515	0.27345	0.800723	TNFRSF14	No	No	No
ENSG00000140750	2281.14	-0.0432462	0.0394955	-1.09496	0.273532	0.800723	ARHGAP17	No	No	No
ENSG00000124201	4360.83	0.0513887	0.0469432	1.0947	0.273648	0.800723	ZNFX1	No	No	No
ENSG00000136286	8965.6	-0.0584683	0.0534313	-1.09427	0.273836	0.800723	MYO1G	No	No	No
ENSG00000119689	3891.02	-0.0289303	0.0264395	-1.09421	0.273863	0.800723	DLST	No	No	No
ENSG00000116062	2510.8	0.0440333	0.0402826	1.09311	0.274346	0.801308	MSH6	No	No	No
ENSG00000174373	1538.42	0.0408474	0.0373686	1.09309	0.274353	0.801308	RALGAPA1	No	No	No
ENSG00000105355	1650.6	0.0389868	0.0356919	1.09232	0.274694	0.801438	PLIN3	No	No	No
ENSG00000159753	3177.84	-0.0504438	0.0461851	-1.09221	0.27474	0.801438	CARMIL2	No	No	No
ENSG00000177000	1516.9	-0.0490559	0.0449351	-1.09171	0.274963	0.801438	MTHFR	No	No	No
ENSG00000164543	9081.12	0.0492974	0.0451666	1.09146	0.275072	0.801438	STK17A	No	No	No
ENSG00000105700	2554.79	-0.0366965	0.0336494	-1.09055	0.275469	0.801438	KXD1	No	No	No
ENSG00000118454	1541.07	0.0266255	0.0244147	1.09055	0.275469	0.801438	ANKRD13C	No	No	No
ENSG00000172725	3597.08	-0.0820917	0.0752788	-1.0905	0.275492	0.801438	CORO1B	No	No	No
ENSG00000166188	1404.56	-0.0418342	0.0383746	-1.09016	0.275645	0.801438	ZNF319	No	No	No
ENSG00000162144	3028.2	0.044067	0.0404496	1.08943	0.275964	0.801438	CYB561A3	No	No	No
ENSG00000175137	1791.42	-0.048736	0.0447485	-1.08911	0.276105	0.801438	SH3BP5L	No	No	No
ENSG00000167578	1743.9	-0.0557553	0.0512005	-1.08896	0.276171	0.801438	RAB4B	No	No	No
ENSG00000170345	2829.7	0.378146	0.347322	1.08875	0.276265	0.801438	FOS	No	No	No
ENSG00000126461	2771.12	-0.0531315	0.0488054	-1.08864	0.276313	0.801438	SCAF1	No	No	No
ENSG00000124532	1492.32	0.0431961	0.0396892	1.08836	0.276436	0.801438	MRS2	No	No	No
ENSG00000213281	3950.76	0.0364403	0.0334914	1.08805	0.276573	0.801438	NRAS	No	No	No
ENSG00000163041	32917.8	-0.0367904	0.033836	-1.08732	0.276896	0.801955	H3F3A	No	No	No
ENSG00000143314	1700.41	-0.041212	0.0379237	-1.08671	0.277166	0.802314	MRPL24	No	No	No
ENSG00000258315	3783.63	-0.0454254	0.0418326	-1.08588	0.27753	0.802949	C17orf49	No	No	No
ENSG00000113643	1511.2	-0.0754337	0.0694918	-1.0855	0.277698	0.803014	RARS	No	No	No
ENSG00000177119	3807.66	-0.0677265	0.062446	-1.08456	0.278116	0.8038	ANO6	No	No	No
ENSG00000104064	2933.88	0.0307436	0.0283666	1.0838	0.278455	0.804081	GABPB1	No	No	No
ENSG00000115935	27688	-0.0359793	0.033203	-1.08362	0.278535	0.804081	WIPF1	No	No	No
ENSG00000234851	55578.9	0.0453779	0.0418863	1.08336	0.278649	0.804081	RPL23AP42	No	No	No
ENSG00000173545	2054.81	0.0308247	0.0284624	1.083	0.278809	0.804123	ZNF622	No	No	No
ENSG00000102898	2851.68	-0.0277595	0.0256428	-1.08254	0.279011	0.804285	NUTF2	No	No	No
ENSG00000140497	7279.01	-0.0359261	0.0332105	-1.08177	0.279356	0.804859	SCAMP2	No	No	No
ENSG00000163655	3397.69	0.0302324	0.0279597	1.08128	0.279571	0.805058	GMPS	No	No	No
ENSG00000158201	1440.06	-0.0544202	0.0504121	-1.07951	0.280362	0.806494	ABHD3	No	No	No
ENSG00000005889	2092	0.0569137	0.0527229	1.07949	0.280371	0.806494	ZFX	No	No	No
ENSG00000150977	2828.8	-0.0524771	0.0486386	-1.07892	0.280624	0.806494	RILPL2	No	No	No
ENSG00000099917	5477.32	-0.0533431	0.0494443	-1.07885	0.280653	0.806494	MED15	No	No	No
ENSG00000170471	3573.63	0.0386271	0.0358259	1.07819	0.280949	0.806903	RALGAPB	No	No	No
ENSG00000097033	5259.07	0.0342434	0.0317692	1.07788	0.281087	0.806903	SH3GLB1	No	No	No
ENSG00000139508	1720.18	-0.0516452	0.0479665	-1.07669	0.281617	0.807363	SLC46A3	No	No	No
ENSG00000164096	12987.6	-0.0347909	0.032324	-1.07632	0.281784	0.807363	C4orf3	No	No	No
ENSG00000167674	1750.86	-0.0341495	0.031739	-1.07595	0.281951	0.807363	AC011498.1	No	No	No
ENSG00000089639	4575.88	-0.0463719	0.0431117	-1.07562	0.282097	0.807363	GMIP	No	No	No
ENSG00000175573	2677.51	-0.0496574	0.0461679	-1.07558	0.282114	0.807363	C11orf68	No	No	No
ENSG00000120616	5550.38	0.0353526	0.0328718	1.07547	0.282165	0.807363	EPC1	No	No	No
ENSG00000074054	1917.69	0.0379373	0.0352829	1.07523	0.28227	0.807363	CLASP1	No	No	No
ENSG00000177700	2436.09	-0.0547021	0.0508964	-1.07477	0.282476	0.807406	POLR2L	No	No	No
ENSG00000144909	1692.07	0.037731	0.0351134	1.07455	0.282578	0.807406	OSBPL11	No	No	No
ENSG00000101158	2867.94	0.0488655	0.0455236	1.07341	0.283087	0.808241	NELFCD	No	No	No
ENSG00000112237	2925.36	0.0468706	0.0436727	1.07322	0.283171	0.808241	CCNC	No	No	No
ENSG00000164054	15284.1	-0.0400924	0.0373712	-1.07282	0.283354	0.808241	SHISA5	No	No	No
ENSG00000168564	4354.14	0.0444578	0.0414779	1.07184	0.283791	0.808241	CDKN2AIP	No	No	No
ENSG00000197746	27853.7	0.0676261	0.0630967	1.07179	0.283816	0.808241	PSAP	No	No	No
ENSG00000127824	8767.9	-0.0649149	0.060574	-1.07166	0.283871	0.808241	TUBA4A	No	No	No
ENSG00000126088	1651.8	-0.0367178	0.034264	-1.07161	0.283894	0.808241	UROD	No	No	No
ENSG00000138617	1411.95	-0.0438217	0.0409434	-1.0703	0.284484	0.809026	PARP16	No	No	No
ENSG00000213465	1660.43	-0.0483357	0.0451765	-1.06993	0.284651	0.809026	ARL2	No	No	No
ENSG00000009790	16278.4	-0.0256219	0.0239479	-1.0699	0.284663	0.809026	TRAF3IP3	No	No	No
ENSG00000131116	2046.23	-0.0502014	0.0469337	-1.06962	0.284789	0.809026	ZNF428	No	No	No
ENSG00000167106	22589.2	0.0582825	0.0545015	1.06937	0.284901	0.809026	FAM102A	No	No	No
ENSG00000130475	1819.35	-0.0607743	0.0569159	-1.06779	0.285615	0.809736	FCHO1	No	No	No
ENSG00000115896	1796.54	0.0942978	0.0883431	1.0674	0.285789	0.809736	PLCL1	No	No	No
ENSG00000171159	2998.88	-0.0474947	0.0444982	-1.06734	0.285819	0.809736	C9orf16	No	No	No
ENSG00000148660	3230.52	0.030905	0.0289743	1.06664	0.286136	0.809736	CAMK2G	No	No	No
ENSG00000088387	5438.8	0.0427812	0.0401245	1.06621	0.286328	0.809736	DOCK9	No	No	No
ENSG00000115947	1917.1	0.0361166	0.0338766	1.06612	0.286368	0.809736	ORC4	No	No	No
ENSG00000162032	1701	-0.0431867	0.0405454	-1.06514	0.286811	0.809736	SPSB3	No	No	No
ENSG00000154222	1871.97	-0.0569965	0.0535123	-1.06511	0.286826	0.809736	CC2D1B	No	No	No
ENSG00000038532	1813.04	-0.0401366	0.0376948	-1.06478	0.286977	0.809736	CLEC16A	No	No	No
ENSG00000065675	3799.79	0.0416068	0.0390782	1.0647	0.28701	0.809736	PRKCQ	No	No	No
ENSG00000135390	16104.1	-0.0425778	0.0399986	-1.06448	0.28711	0.809736	ATP5G2	No	No	No
ENSG00000196182	3120.89	-0.0413168	0.0388207	-1.0643	0.287194	0.809736	STK40	No	No	No
ENSG00000177628	1610.98	-0.0393056	0.0369334	-1.06423	0.287225	0.809736	GBA	No	No	No
ENSG00000114982	2487.98	-0.0408757	0.0384118	-1.06414	0.287263	0.809736	KANSL3	No	No	No
ENSG00000170791	3230.15	0.0446252	0.0419431	1.06395	0.287353	0.809736	CHCHD7	No	No	No
ENSG00000142507	2554.67	-0.0310998	0.0292393	-1.06363	0.287496	0.809736	PSMB6	No	No	No
ENSG00000121644	1447.98	-0.0480321	0.0451745	-1.06326	0.287665	0.8098	DESI2	No	No	No
ENSG00000147130	1543	0.0468645	0.0441189	1.06223	0.288131	0.809827	ZMYM3	No	No	No
ENSG00000160888	5323.82	-0.102097	0.0961303	-1.06207	0.288204	0.809827	IER2	No	No	No
ENSG00000117906	2695.23	0.0403769	0.0380226	1.06192	0.288272	0.809827	RCN2	No	No	No
ENSG00000135801	1602.43	-0.0215932	0.0203418	-1.06152	0.288455	0.809827	TAF5L	No	No	No
ENSG00000152404	1576.88	0.0539537	0.050837	1.06131	0.28855	0.809827	CWF19L2	No	No	No
ENSG00000065357	11448.3	-0.0412674	0.0389153	-1.06044	0.288944	0.809827	DGKA	No	No	No
ENSG00000115762	5100.46	-0.0366192	0.0345389	-1.06023	0.28904	0.809827	PLEKHB2	No	No	No
ENSG00000139163	3560.14	0.0569983	0.0537797	1.05985	0.289213	0.809827	ETNK1	No	No	No
ENSG00000165175	2957.02	-0.0743012	0.0701093	-1.05979	0.28924	0.809827	MID1IP1	No	No	No
ENSG00000067560	29066.2	-0.0261476	0.0246762	-1.05963	0.289314	0.809827	RHOA	No	No	No
ENSG00000175334	4714.63	-0.0549408	0.0518502	-1.05961	0.289324	0.809827	BANF1	No	No	No
ENSG00000134825	3635.44	-0.0448853	0.0423702	-1.05936	0.289436	0.809827	TMEM258	No	No	No
ENSG00000147604	175863	0.0423	0.0399509	1.0588	0.289691	0.809827	RPL7	No	No	No
ENSG00000100219	9698.43	-0.105192	0.0993693	-1.05859	0.289785	0.809827	XBP1	No	No	No
ENSG00000140968	2523.52	0.179586	0.169697	1.05828	0.289929	0.809827	IRF8	No	No	No
ENSG00000132466	4218.99	0.031095	0.0293882	1.05808	0.290019	0.809827	ANKRD17	No	No	No
ENSG00000181061	3345.43	-0.0330014	0.0312269	-1.05682	0.290592	0.811014	HIGD1A	No	No	No
ENSG00000164880	3363.06	-0.0391146	0.03704	-1.05601	0.290964	0.811423	INTS1	No	No	No
ENSG00000198763	262879	0.0881293	0.0834915	1.05555	0.291175	0.811423	MT-ND2	No	No	No
ENSG00000169756	7182.12	-0.0820374	0.0777411	-1.05526	0.291304	0.811423	LIMS1	No	No	No
ENSG00000108389	1557.21	0.0477521	0.0452533	1.05522	0.291325	0.811423	MTMR4	No	No	No
ENSG00000105443	1957.91	-0.0353023	0.0334812	-1.05439	0.291703	0.81151	CYTH2	No	No	No
ENSG00000181896	3985.13	0.0602694	0.0572176	1.05334	0.292187	0.81151	ZNF101	No	No	No
ENSG00000165669	2261.6	0.0299413	0.0284292	1.05319	0.292255	0.81151	FAM204A	No	No	No
ENSG00000177731	6964	-0.0533785	0.0506993	-1.05284	0.292412	0.81151	FLII	No	No	No
ENSG00000108561	6524.01	0.0378099	0.0359194	1.05263	0.292511	0.81151	C1QBP	No	No	No
ENSG00000073921	4524.62	-0.0439899	0.0418194	-1.0519	0.292844	0.81151	PICALM	No	No	No
ENSG00000135250	2971.36	0.0379145	0.0360449	1.05187	0.29286	0.81151	SRPK2	No	No	No
ENSG00000157637	4953.95	-0.0559869	0.0532345	-1.0517	0.292936	0.81151	SLC38A10	No	No	No
ENSG00000173706	1457.41	-0.0650043	0.0618117	-1.05165	0.29296	0.81151	HEG1	No	No	No
ENSG00000053501	1365.44	0.0442464	0.0420738	1.05164	0.292965	0.81151	USE1	No	No	No
ENSG00000196405	20514.3	-0.0394566	0.0375279	-1.05139	0.293079	0.81151	EVL	No	No	No
ENSG00000188322	2335.68	-0.0855651	0.0814275	-1.05081	0.293345	0.81151	SBK1	No	No	No
ENSG00000197223	1505.83	-0.0351933	0.0335051	-1.05038	0.293541	0.81151	C1D	No	No	No
ENSG00000105778	2474.5	0.0294804	0.0280734	1.05012	0.293664	0.81151	AVL9	No	No	No
ENSG00000281766	3081.25	0.0538482	0.0512796	1.05009	0.293676	0.81151	RYBP	No	No	No
[truncated: 10,624 more rows]
